# Supplementary material for: A Bacterial Pathogen Senses Host Mannose to Coordinate Virulence
Source: PubMed Central journal article supplement — iScience. 2019 Sep 25;20:310–23. doi: 10.1016/j.isci.2019.09.028 (PMC6817725; doi:10.1016/j.isci.2019.09.028), 2019-09-25
Supplement: mmc1.pdf [file mmc1.pdf]

**ISCI, Volume 20**

## **Supplemental Information**

### **A Bacterial Pathogen Senses Host Mannose to Coordinate Virulence**

**Lifan Wei, Haoxian Qiao, Brandon Sit, Kaiyu Yin, Guanhua Yang, Ruiqing Ma, Jiabao Ma, Chun Yang, Jun Yao, Yue Ma, Jingfan Xiao, Xiaohong Liu, Yuanxing Zhang, Matthew K. Waldor, and Qiyao Wang**

1 Supplemental Materials

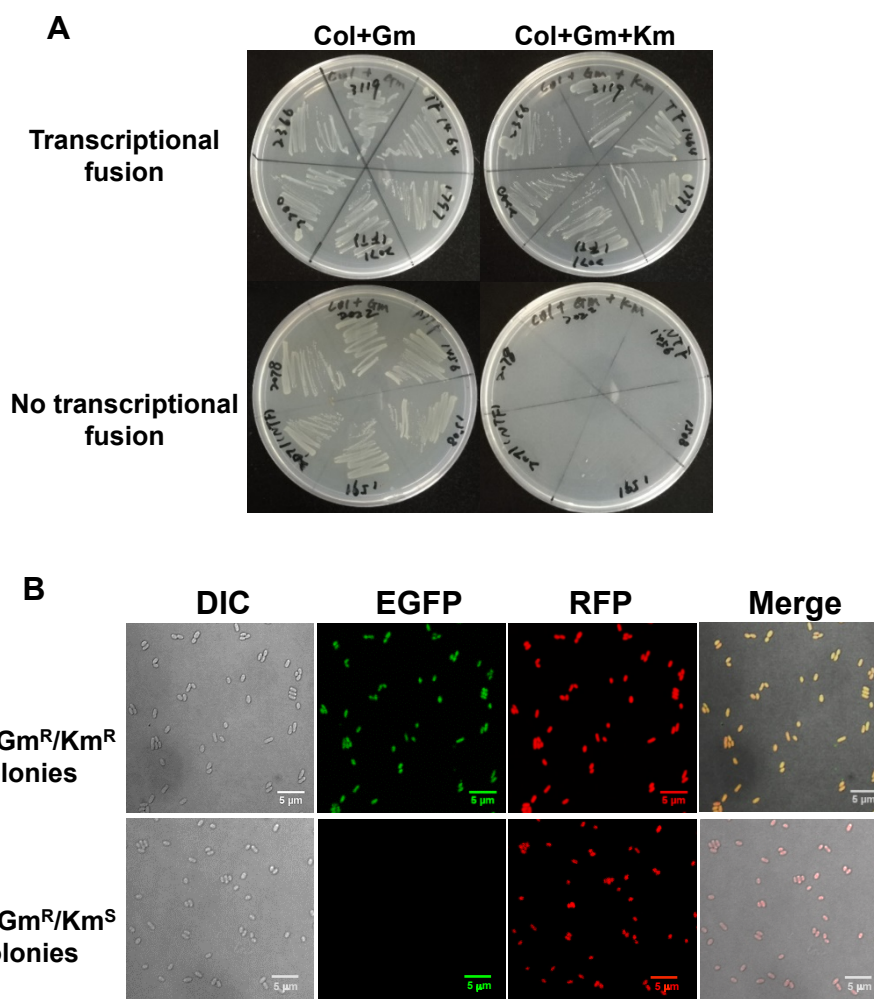

2

3

4 Supplemental Figure S1. Validation of the properties of the MKGR transposon insertion

5 mutants. Related to Figure 1. (A) Antibiotic resistance of 6 insertion mutants (ETA\_E\_1464,

6 ETA\_E\_1797 (*hemR*), ETA\_E\_2071 (*evrA*), ETA\_E\_2200, ETA\_E\_2366 (*hybA*), and EATE\_3119)

7 that are predicted to generate active transcriptional fusions and 6 insertion mutants

8 (ETA\_E\_1456 (*yoaA*), ETA\_E\_1508 (*adhE*), ETA\_E\_1591 (*gloA*), ETA\_E\_2071 (*evrA*),

9 ETA\_E\_2078, and ETA\_E\_2022) that do not create transcriptional fusions. The 6 insertions

10 creating transcriptional fusions are resistant to Km as well as Col and Gm, whereas the latter 6

11 are not resistant to Km. (B) Detection of GFP and RFP fluorescence in Km<sup>R</sup> and Km<sup>S</sup> Tn

12 insertion mutants. Scale bar represents 5 μm.

13

14

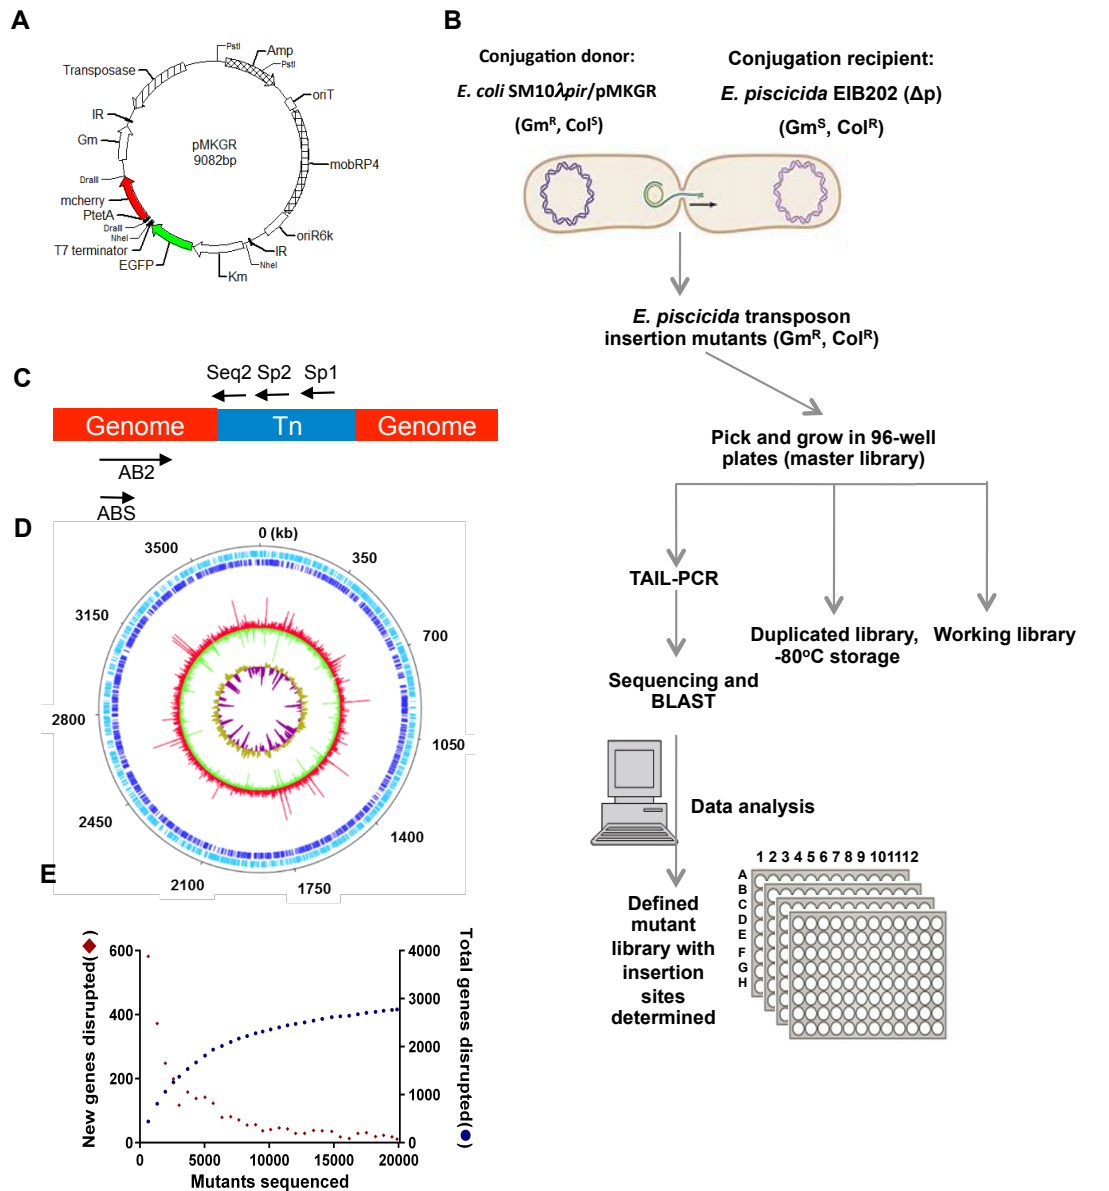

15

16 **Supplemental Figure S2. Work flow for construction of the defined mutant library.**

17 Related to Figure 1. **(A)** Vector map of pMKGR. **(B)** *E. coli* SM10  $\lambda$ pir and *E. piscicida* EIB202  
 18 ( $\Delta$ p) were used as the conjugation donor and recipient strains, respectively. To determine the  
 19 transposon insertion sites, TAIL-PCRs were performed to amplify the junctions of the genome  
 20 and transposon and the PCR products were sequenced and analyzed. The mutants were  
 21 re-arrayed into different subset libraries for various screens. The master libraries and the  
 22 subset libraries were duplicated for -80 °C storage or as working libraries. **(C)** Schematic of  
 23 TAIL-PCR amplification used for determination of the transposon insertion sites. The primer  
 24 pair Sp1/AB2 was used for the first round of PCR and the primer pair Sp2/ABS was used for  
 25 second round of PCR. The Seq2 primer was used for sequencing of the amplification products.  
 26 **(D)** Distribution of mapped transposon insertions on the *E. piscicida* chromosome. The most

27 outward circle represents the genes encoded in the two strands of DNA. The second circle  
 28 displays the distribution of the transposon insertions, with the red and green bars representing  
 29 the forward and reverse orientation of insertions within genes, respectively. The inner purple  
 30 and olive circles corresponded to TA and GC contents on genome, respectively. (E)  
 31 Sequencing saturation plot of the defined mutant library. The number of new ORFs disrupted  
 32 (brown diamonds) and the total number of ORFs disrupted in the library (blue circles) are  
 33 shown.

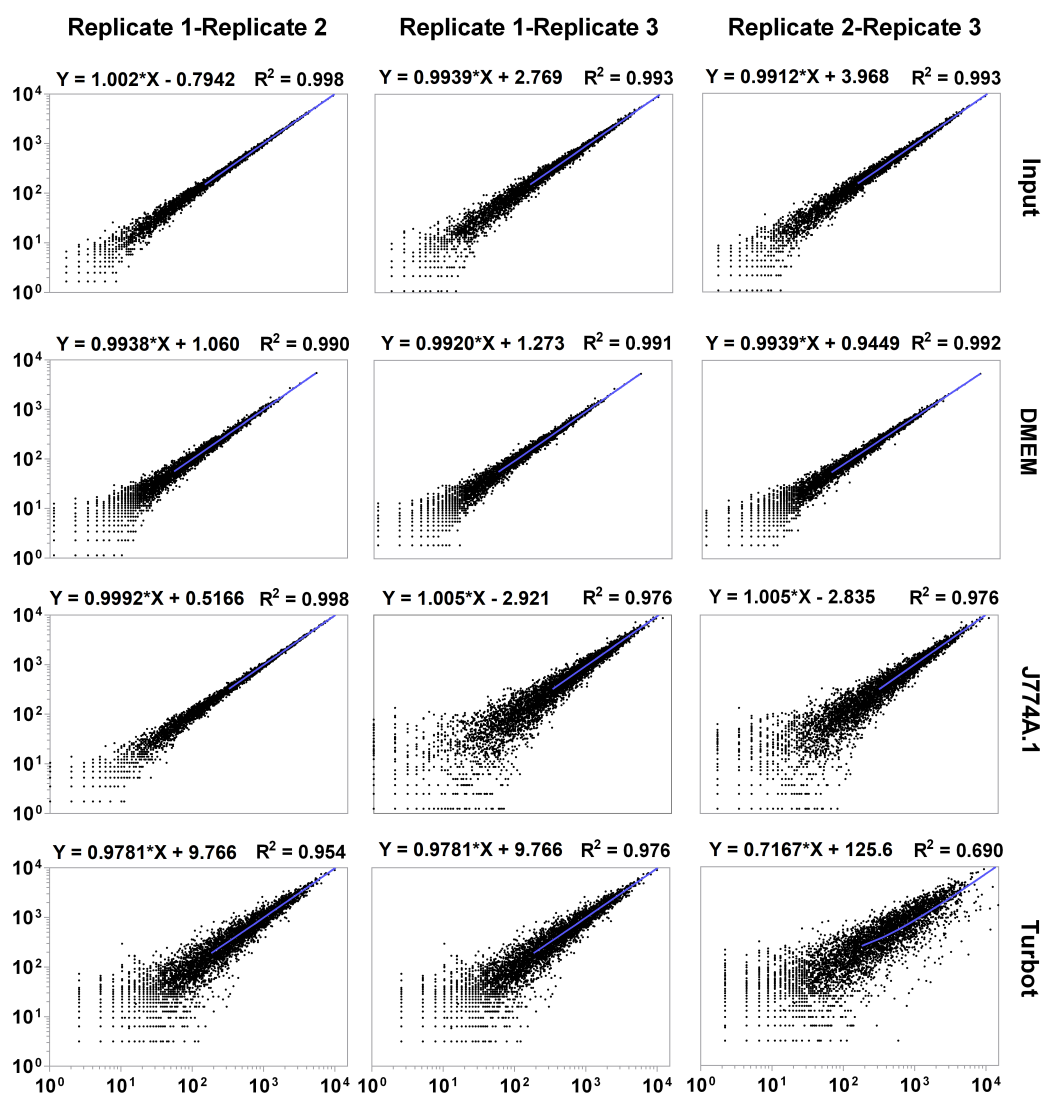

34  
 35 **Supplemental Figure S3. Correlation of experimental replicates from TIS experiments.**  
 36 Related to Figure 1. The sequencing data from experimental replicates of input libraries ( $n = 3$ )  
 37 and output libraries ( $n = 3$ ) recovered after growth in DMEM ( $n = 3$ ), J774A.1 ( $n = 3$ ), and  
 38 turbot ( $n = 3$ ) are shown.  
 39

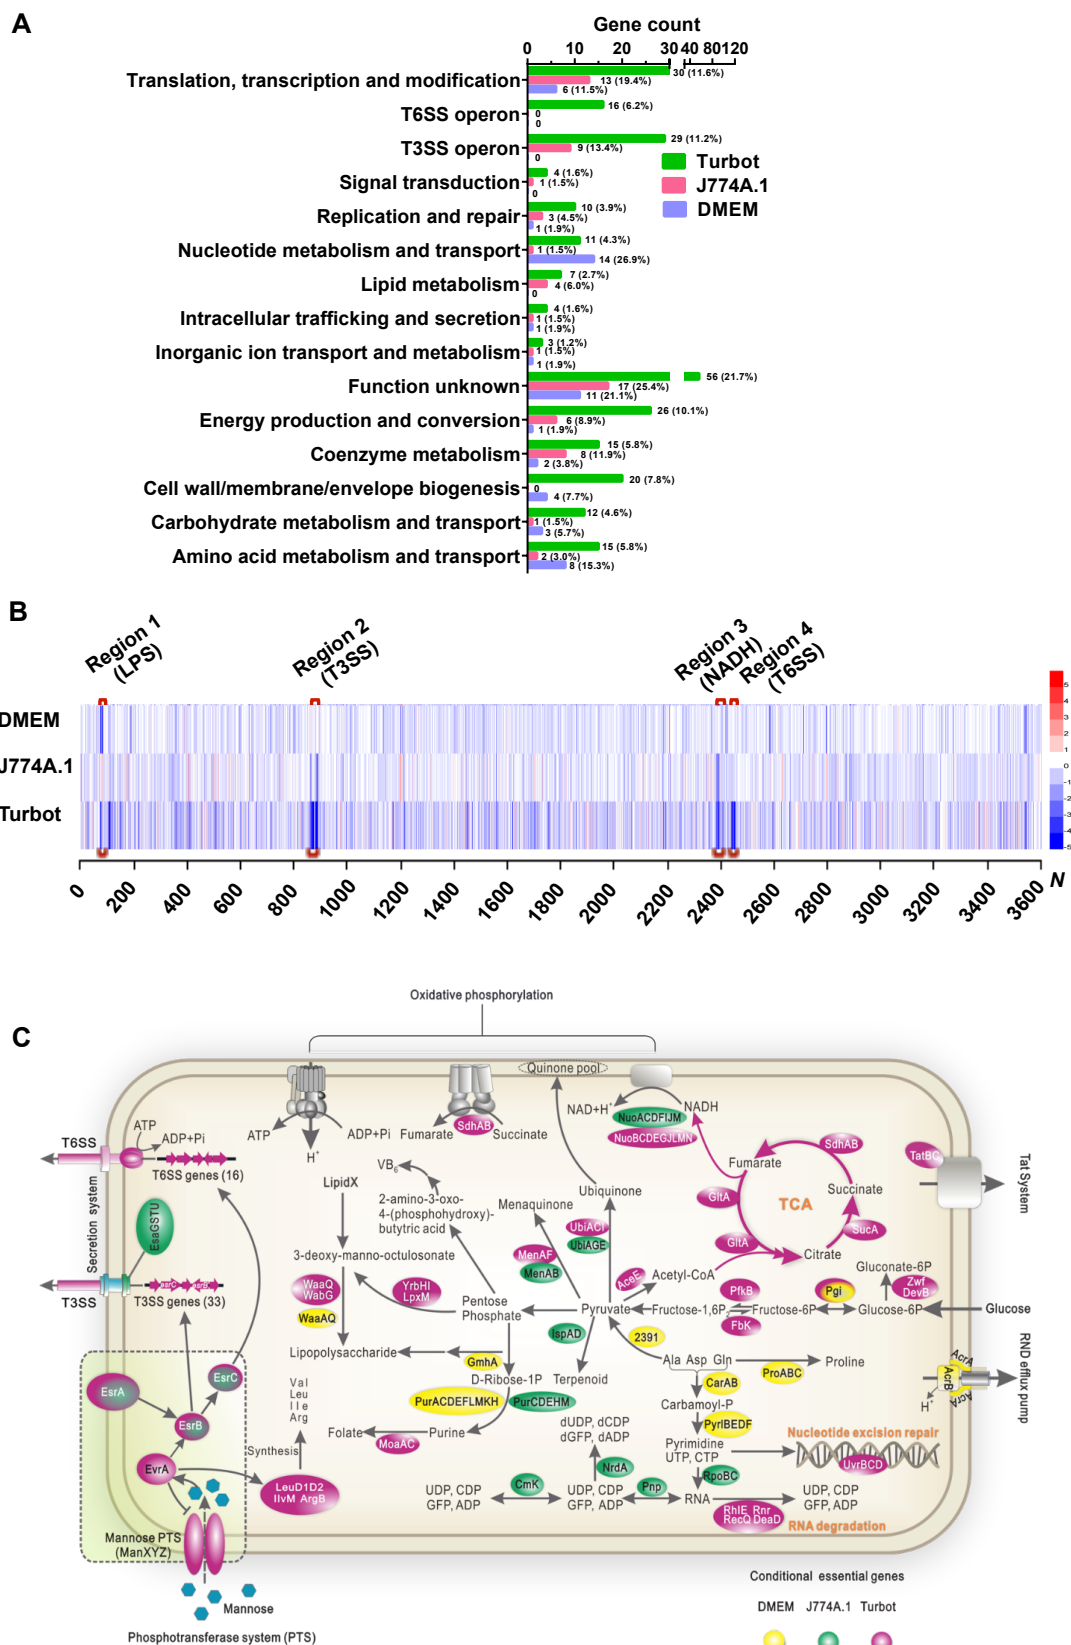

40

41 **Supplemental Figure S4. Fitness of *E. piscicida* transposon mutants in DMEM,**

42 **macrophages and turbot. Related to Figure 1. (A) COG categories of depleted genes in the**

43 **three conditions. The number of depleted genes in each category is shown; the percentages**

44 shown are the fraction of the total number of depleted genes represented by the number of  
 45 depleted genes/category. **(B)** Heatmap of relative abundances of mutants in indicated  
 46 conditions. Colored lines represent FC values of the genes across the genome (N). Four gene  
 47 clusters, associated with LPS synthesis, T3SS, NADH, and T6SS, exhibiting reduced  
 48 abundance in the turbot outputs, are highlighted. **(C)** Schematic model of genes and pathways  
 49 essential for *in vivo* and *in vitro* growth in *E. piscicida*. Yellow, green, and pink colors  
 50 respectively represented the growth conditions of DMEM, J774A.1 cells, and in turbot. The  
 51 genes required for growth in specific conditions were highlighted in the colored ovals. The  
 52 upstream regulatory network of T3/T6SS as well as the putative mannose metabolic pathways  
 53 were highlighted in a dashed box.

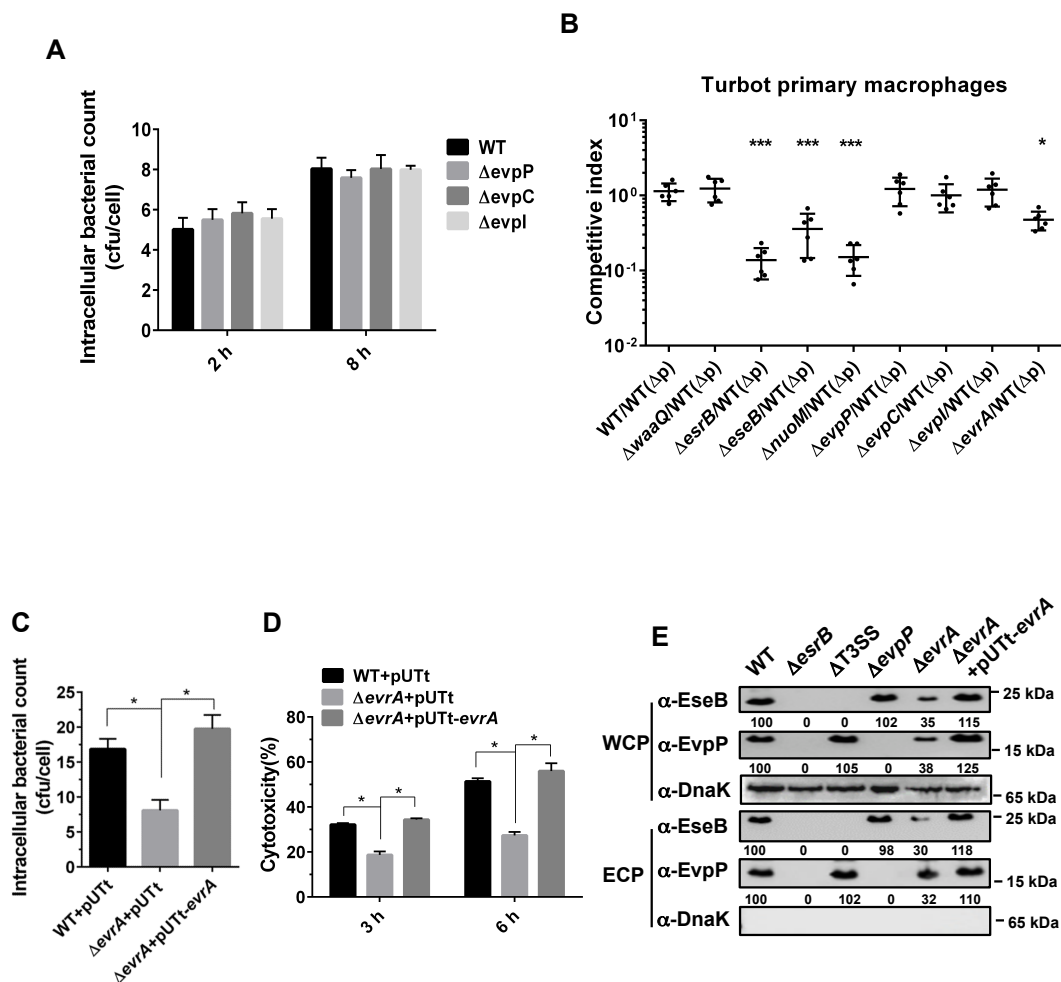

54  
 55 **Supplemental Figure S5. Intracellular growth of various *E. piscicida* mutants in J774A.1**  
 56 **and turbot primary macrophages.** Related to Figure 1. **(A)** Intracellular bacterial counts of  
 57 WT or individual T6SS deletion mutants grown in primary turbot macrophages; the means and  
 58 SD from 3 replicates are shown. **(B)** Competition assays between the indicated deletion  
 59 mutant vs. WT( $\Delta P$ ) in primary turbot macrophages. Data presented are the mean  $\pm$  SD from 6

60 replicates. \* $P < 0.05$ , \*\*\*  $P < 0.001$  based on ANOVA followed by Bonferroni's  
61 multiple-comparison post-test comparing the data to the values from the WT/ WT $\Delta$ p  
62 competitions. **(C-D)** Intracellular *E. piscicida* CFU recovered (C), and cytotoxicity (D) of WT,  
63  $\Delta evrA$  and the complemented strain towards J774A.1 cells. After incubation in DMEM for 12 h,  
64 WT,  $\Delta evrA$  and the complemented strain were used to infect J774A.1 cells at an MOI of 10.  
65 Cytotoxicity was detected at 3 and 6 hours post infection using an LDH assay. Data were  
66 shown as the mean  $\pm$  SEM of results for triplicate cultures or assays. \*,  $P < 0.05$  based on  
67 student's *t*-test. **(E)** Western blot analysis of EseB and EvpP expression and secretion in the  
68 indicated strains. The cell lysates (WCP) and extracellular proteins (ECPs) were analyzed by  
69 western blotting with the indicated antibodies. DnaK levels were used as the loading control.

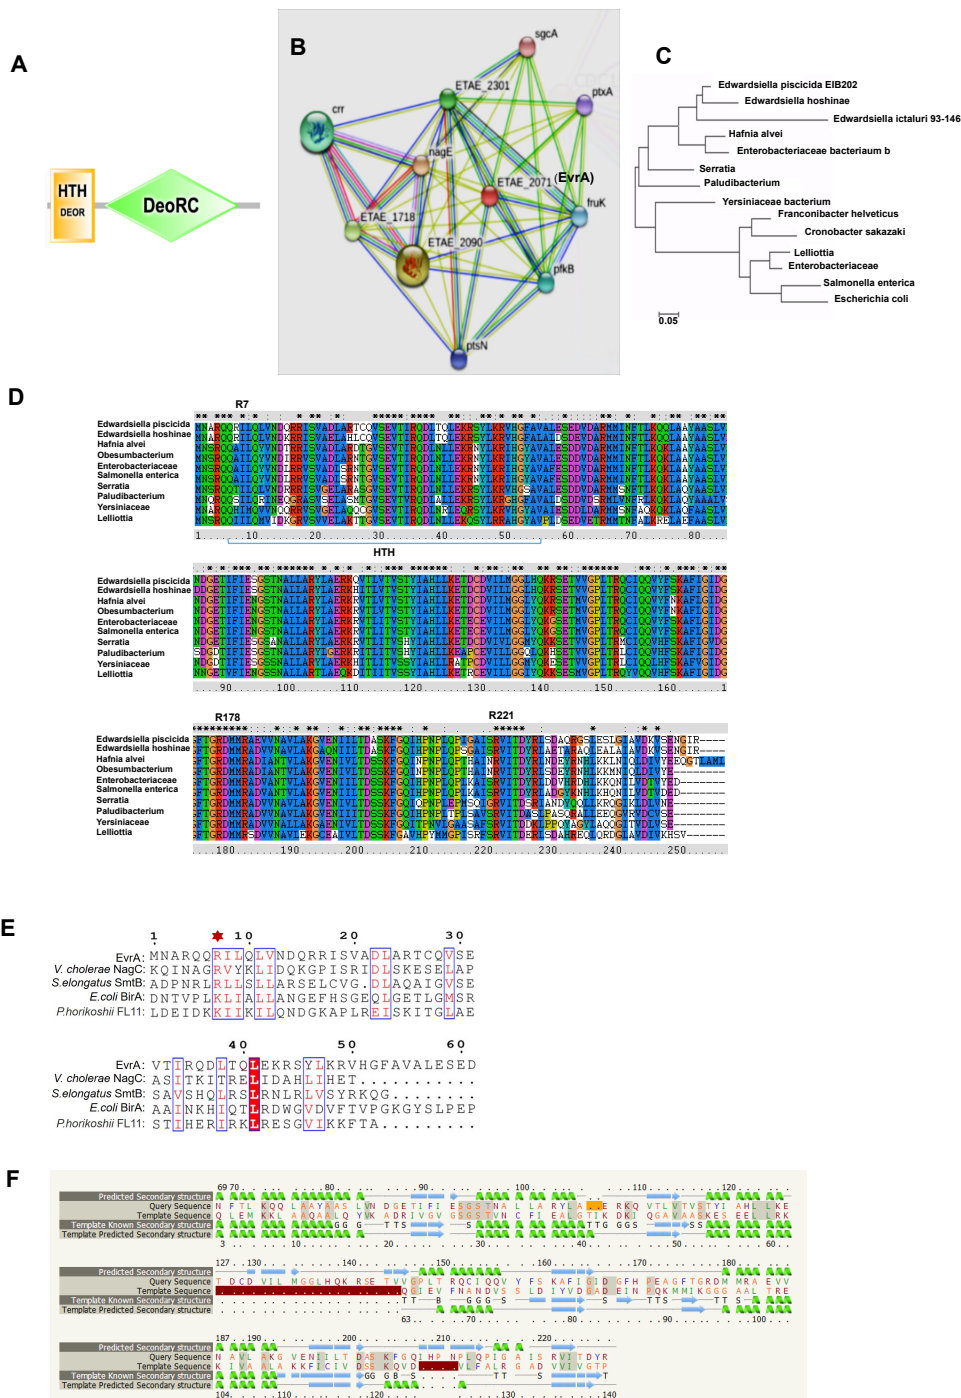

70

71 **Supplemental Figure S6. EvrA is a DeoR family protein.** Related to Figure 3. **(A)** Domain  
72 structure of EvrA. **(B)** The protein network of EvrA as predicted by STRING includes  
73 PTS-related proteins, e.g. *crr*, *nagE*, *fruK*, *ptkB*, *ptsN*, *sgcA*, 2301 (Fructose-specific PTS  
74 system IIBC component), 2090 (glucose-specific IIBC subunit), and 1718  
75 (Beta-glucoside-specific PTS system components IIABC). **(C)** Phylogenetic tree of EvrA  
76 multiple sequence alignments. The phylogenetic tree was inferred with a Neighbor-Joining  
77 algorithm built in MEGA (v6.0.6). **(D)** Conservation of EvrA in other bacterial species. The  
78 conserved residues are highlighted with various colors. The residues R7, R178 and R221 as



79 well as the N-terminal HTH were as indicated. (E) The sequence alignment of the N-terminal  
 80 HTH domain of EvrA. The conserved R7 residue was indicated by an asterisk. (F) Sequence  
 81 alignment and predicted secondary structures between the indicated regions of EvrA (query)  
 82 with the model RpiA (1LK7) (template).

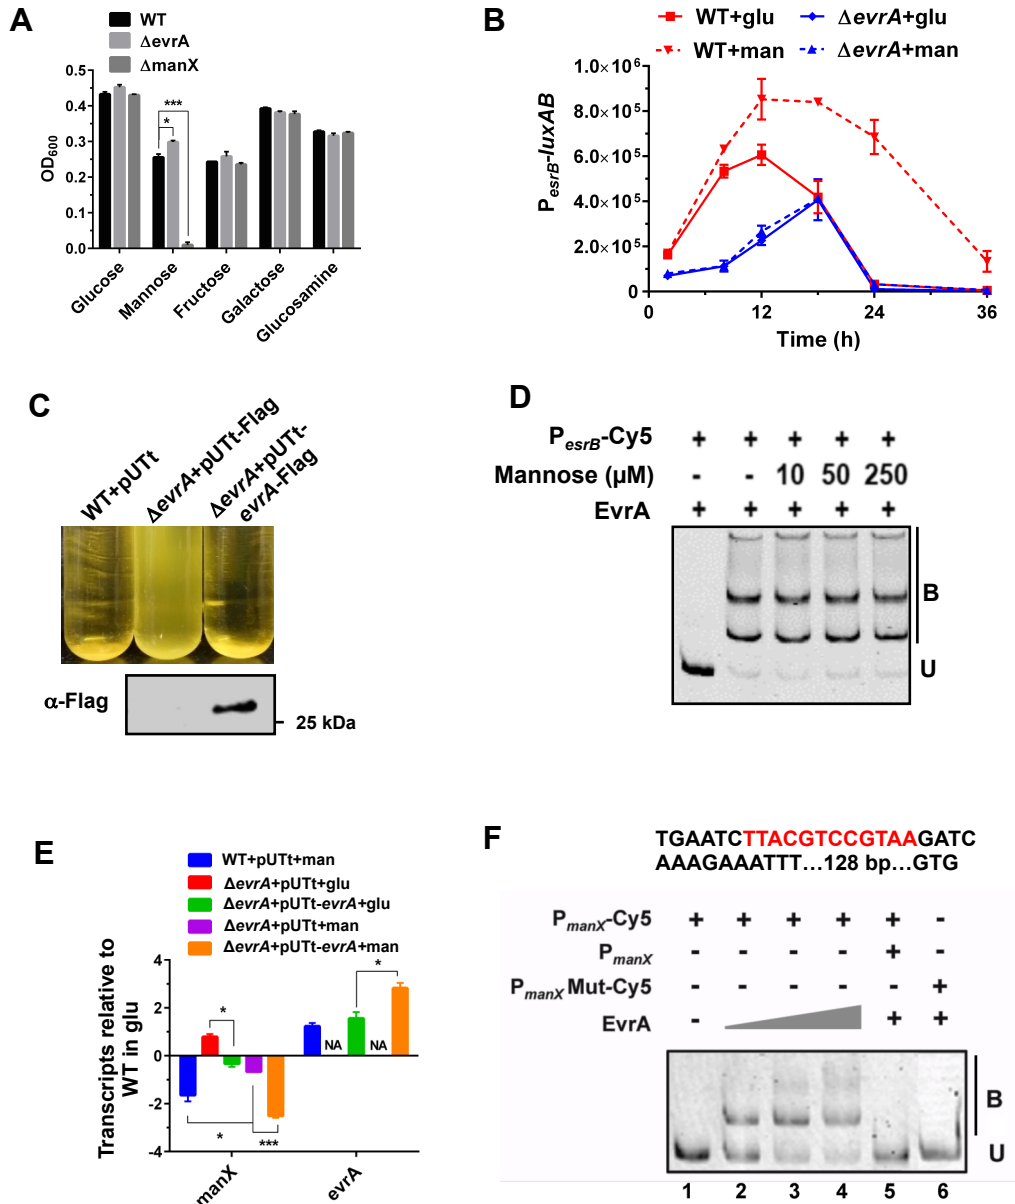

83  
 84 **Supplemental Figure S7. Mannose stimulates evrA-dependent induction of espB**  
 85 **expression.** Related to Figure 4. (A) Optical density at 600 nm (OD<sub>600</sub>) of 24 h cultures of WT,  
 86 ΔevrA and ΔmanX in DMEM medium supplemented with 5 mg/mL of the indicated sugar.  
 87 Results shown are mean ± SD from 3 replicates, \* *P* < 0.05; \*\*\*, *P* < 0.001 based on the  
 88 student's *t*-test. (B) P<sub>espB</sub>-luxAB activity in the indicated strains grown in DMEM supplemented  
 89 with glucose (glu) or mannose (man). (C) Auto-aggregation and protein expression in *E.*  
 90 *piscicida* strains bearing an empty FLAG vector or a vector with EvrA-FLAG. (D) EMSA of

91 EvrA binding to *esrB* promoter in the presence of increasing concentrations of mannose. **(E)**  
92 qRT-PCR analyses of *manX* and *evrA* transcript levels in cells grown in glucose or mannose  
93 compared to those in WT cells grown in glucose. *gyrB* was used as a control.  $n = 3$ , \*  $P < 0.05$   
94 based on Student's *t*-test. NA, not applicable. **(F)** EMSA of EvrA binding to the predicted *manX*  
95 promoter ( $P_{manX}$ ). 5-fold excess of un-labeled  $P_{manX}$  probe was added to lane to confirm the  
96 specificity of the mobility shift. The putative binding motif in  $P_{manX}$  was mutated (T to G and A to  
97 C) in  $P_{manX}$ Mut.

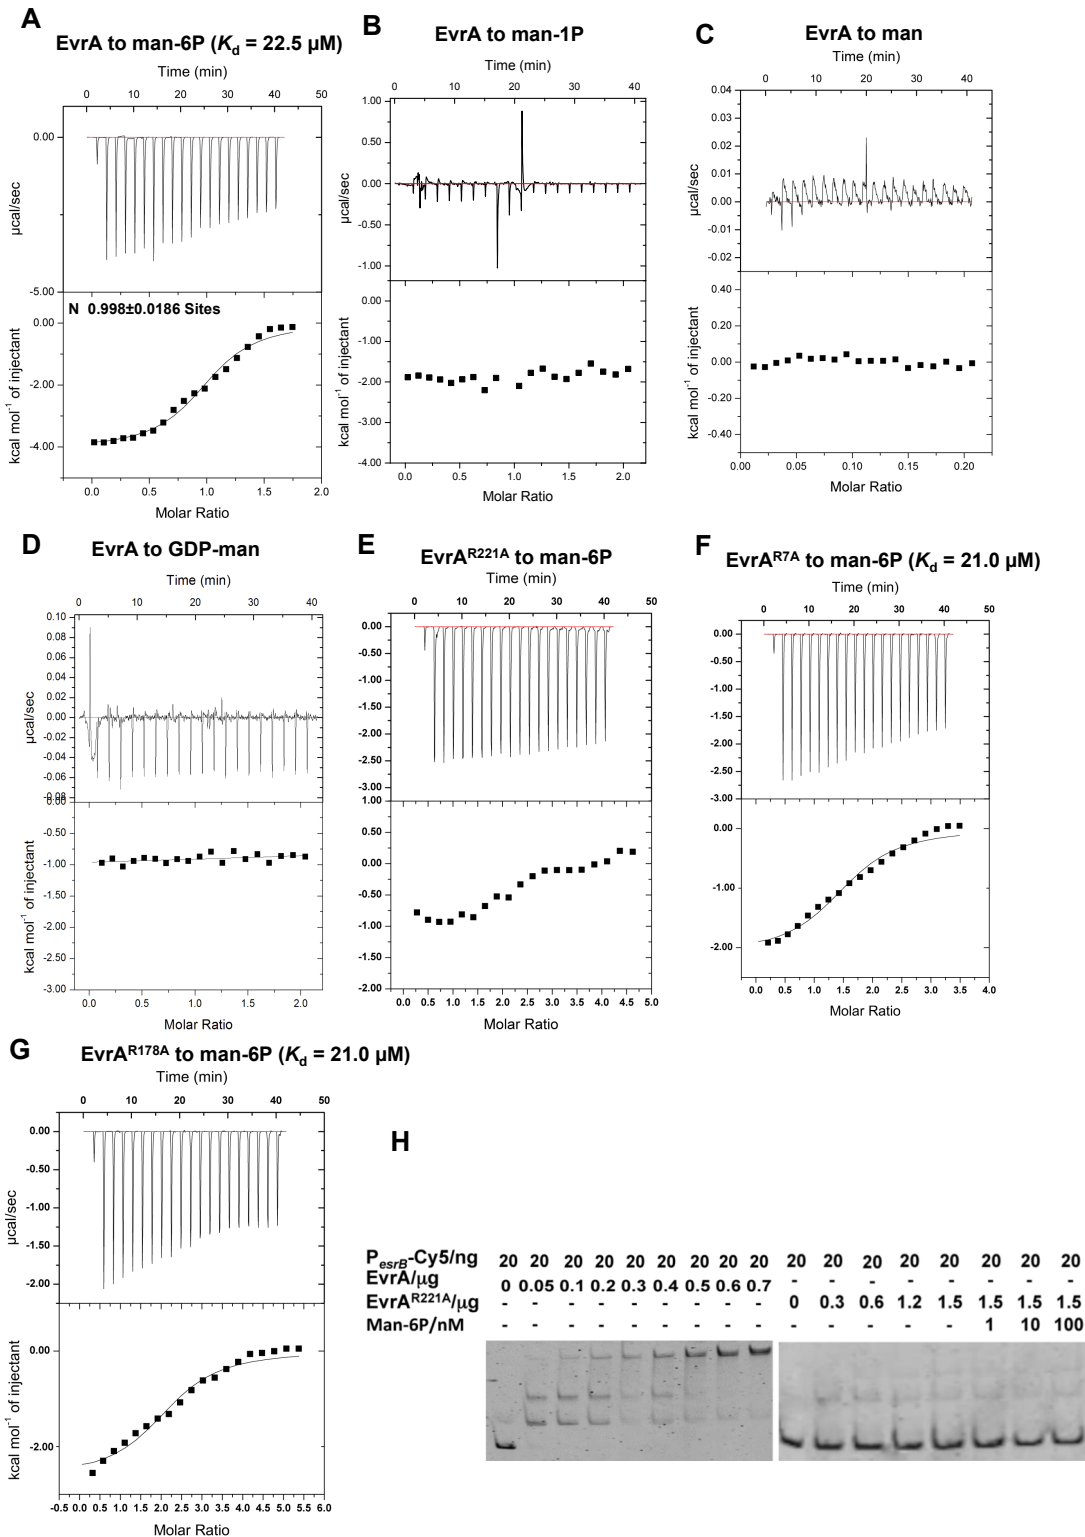

98

99

**Supplemental Figure S8. Binding behaviors of EvrA or EvrA<sup>R141A</sup> binding to *esrB* in the**

**presence of various sugars.** Related to Figure 5. **(A-G)** Isothermal titration calorimetry (ITC)

analyses of interaction of EvrA protein with mannose-6P (man-6P) (A), mannose-1P (man-1P)

(B), mannose (man) (C), and GDP-mannose (GDP-man) (D). EvrA<sup>R221A</sup> (E), EvrA<sup>R7A</sup> (F), and

EvrA<sup>R178A</sup> (G) were also tested for interactions with man-6P. The top panel shows the raw

104 calorimetric data for the interaction and bottom panel the integrated heat changes, corrected  
105 for heat of dilution, and fitted to a single-site binding model.  $K_d$ , dissociation constant. **(H)**  
106 EMSA of EvrA or EvrA<sup>R221A</sup> binding to *esrB* promoter probe in the absence or presence of  
107 excess man-6P. In EMSA experiments, 20 ng of each Cy5-labeled probe was added to the  
108 EMSA reactions. B: bound DNA; U: unbound DNA.

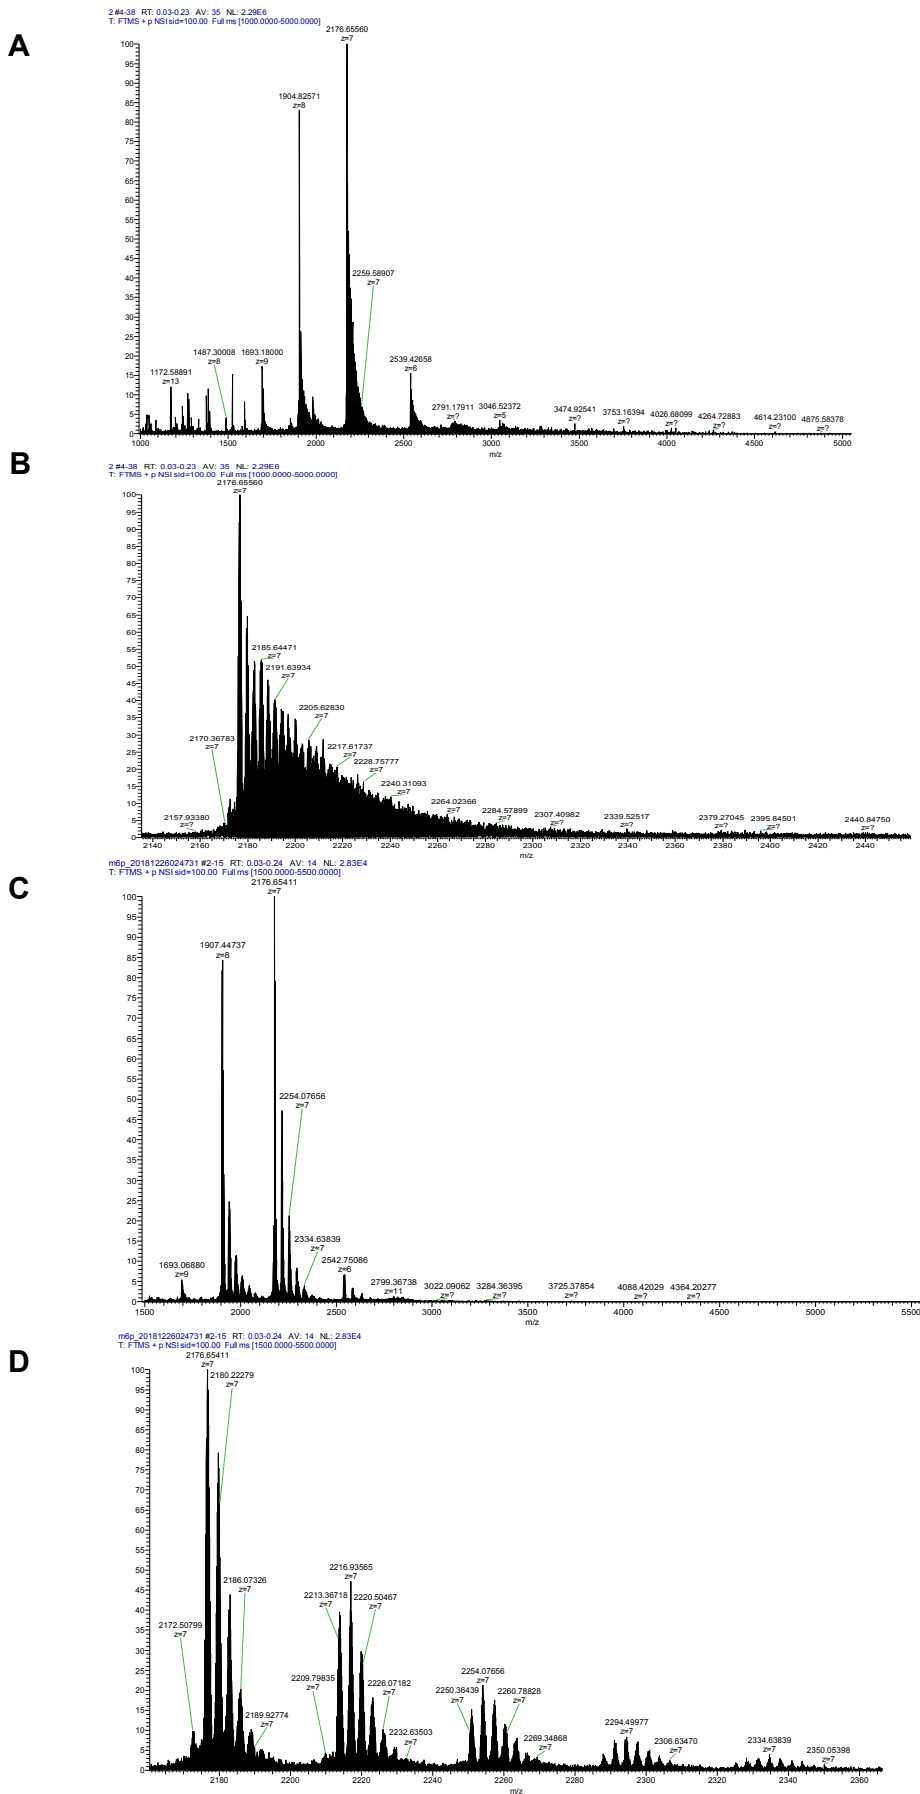

109

110

Supplemental Figure S9. Related to Figure 5. Mass spectrometry of EvrA in complex

111 with Man-6P after denatured with the addition of formic acids (A and B) or in the native  
 112 condition (non-formic acid-treated) (C and D). Mass spectrometry B and D were zoomed in  
 113 from the respective peak clusters with  $z = 7$  (A and B).  
 114

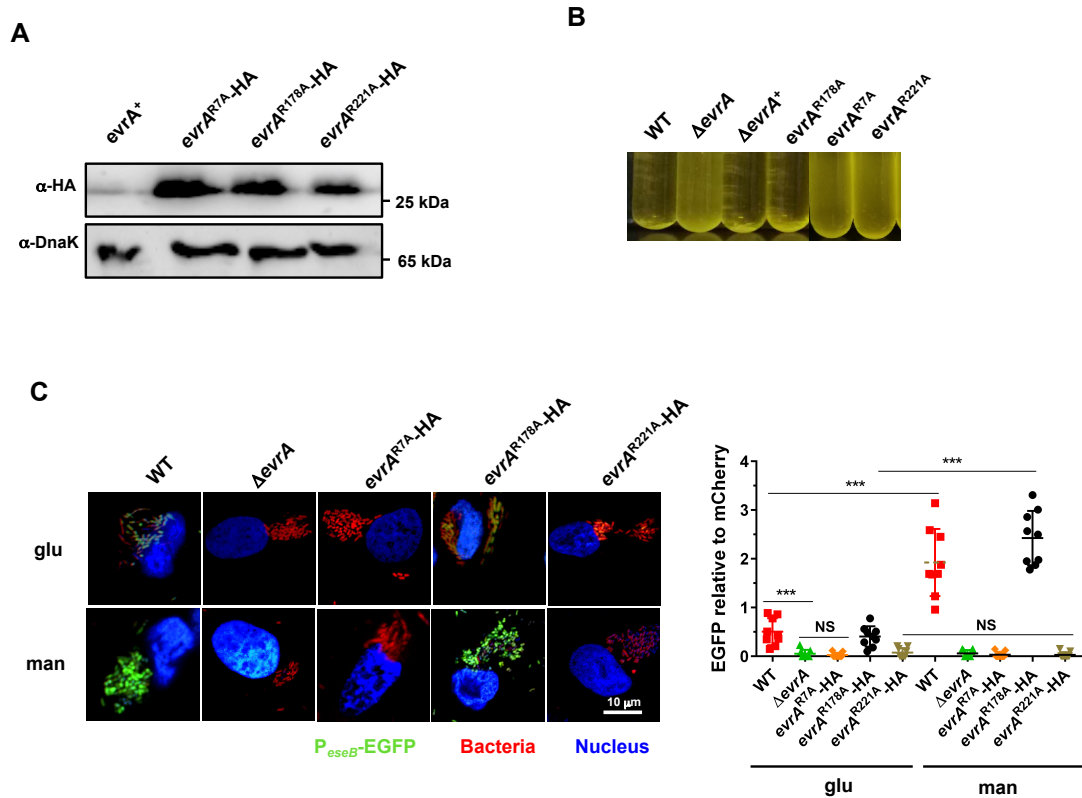

115  
 116 **Supplemental Figure S10. Characterization of critical Arg residues in EvrA regulation of**  
 117 **virulence gene expression.** Related to Figure 5. **(A)** Western blot of expression levels of  
 118 EvrA or EvrA-HA in various *E. piscicida* strains used in Figures 5 and 6. DnaK was used as a  
 119 loading control. **(B)** Auto-aggregation phenotypes of WT,  $\Delta evrA$ ,  $\Delta evrA^+$ , and various  $\Delta evrA$   
 120 strains expressing R7A, R178A and R221A of EvrA variants. **(C)** Detection of *eseB* expression  
 121 in HeLa cells infected by the indicated *E. piscicida* strains carrying a  $P_{eseB}$ -EGFP reporter  
 122 plasmid. Bacteria were pre-incubated in glucose or mannose before infection at an MOI of 10  
 123 for 8 h. mCherry fluorescence (red) was used to identify intracellular bacterial cells. DAPI was  
 124 used to label cell nuclei (blue). Scale bar represents 10  $\mu$ M. Quantification results are shown  
 125 for at least 9 cells. \*\*\*  $P < 0.0001$  based on Student's *t*-test.

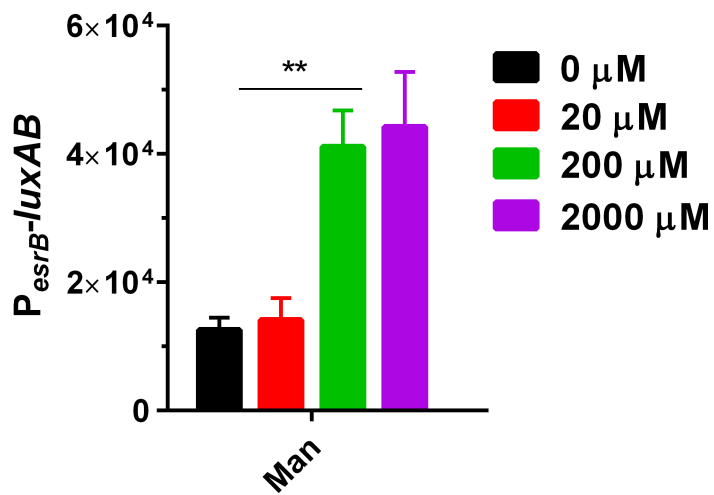

126

127 **Supplemental Figure S11. Activation of *esrB* expression by Mannose of physical**  
 128 **concentrations.** Related to Figure 6. Chromosomal  $P_{esrB-luxAB}$  reporter activity in WT grown  
 129 for 12 h in DMEM medium supplemented with mannose at indicated concentrations. Data  
 130 shown are the mean ± SEM of results for triplicate assays. \*  $P < 0.05$ ; \*\*,  $P < 0.01$  based on  
 131 the student's *t*- test.

132

**Table S1 Characteristics of the *E. piscicida* EIB202 derived defined transposon mutant library**

| Data set                                                                                                                       | N       |
|--------------------------------------------------------------------------------------------------------------------------------|---------|
| Master library                                                                                                                 |         |
| Transposon mutants isolated                                                                                                    | 34,560  |
| Mutants with well-defined insertion locations                                                                                  | 24,470  |
| Mutants in unique genomic locations                                                                                            | 20,346  |
| Insertions inside ORFs                                                                                                         | 18,128  |
| Insertions between ORFs                                                                                                        | 6,342   |
| Insertions inside 5-85% ORFs                                                                                                   | 14,028  |
| Insertions outside 5-85% ORFs                                                                                                  | 4,100   |
| Transcriptional fusion                                                                                                         | 12,295  |
| Transposon with – frame insertions <sup>a</sup>                                                                                | 12,383  |
| Transposon with + frame insertions <sup>b</sup>                                                                                | 12,087  |
| Annotated ORFs in <i>E. piscicida</i>                                                                                          | 3,599   |
| ORFs disrupted                                                                                                                 | 2,806   |
| ORFs without hits                                                                                                              | 793     |
| Average hits per annotated ORF                                                                                                 | 5.04    |
| Predicted essential genes                                                                                                      | 496     |
| Conditional essential genes/ intergenic regions in DMEM medium                                                                 | 52/20   |
| Conditional essential genes/ intergenic regions in J774A.1                                                                     | 67/62   |
| Conditional essential genes/ intergenic regions in turbot                                                                      | 258/108 |
| Subset libraries <sup>c</sup>                                                                                                  |         |
| 1 <sup>st</sup> NR subset (single mutant for each disrupted ORF) <sup>d</sup>                                                  | 2,759   |
| 2 <sup>nd</sup> NR subset (single mutant for each disrupted ORF) <sup>e</sup>                                                  | 2,235   |
| 3 <sup>rd</sup> NR subset (Tn transcriptionally fused to the disrupted gene) <sup>f</sup>                                      | 3,705   |
| 4 <sup>th</sup> NR subset (mutants with intergenic insertions) <sup>g</sup>                                                    | 2,305   |
| 5 <sup>th</sup> NR subset (composite library of equally mixed 1 <sup>st</sup> , 2 <sup>nd</sup> , and 4 <sup>th</sup> subsets) | 7,299   |

<sup>a, b</sup> “+” and “-” indicates that the direction of transposon insertion is consistent with or reverse with the direction of gene, respectively.

<sup>c</sup> the number indicated the mutants included in the specific subset:

<sup>d, e</sup> No. 1 and 2 non-redundant (NR) libraries are parallel containing distinct insertion (20-80% region in the gene) mutants in the same allelic genes:

<sup>f, g</sup> No more than two transcriptional fusion mutants for each disrupted ORF were selected for the 3<sup>rd</sup> and 4<sup>th</sup> subset.



**Table S7 List of 5th subset of defined transposon insertion mutant library**

| Name of Composite Collection    | Annotation                                                                                                                                                                          |
|---------------------------------|-------------------------------------------------------------------------------------------------------------------------------------------------------------------------------------|
| 1st subset composite collection | composite collection of 1st subset, Col <sup>r</sup> and Gm <sup>r</sup> , consist of 10 $\mu$ l bacterium culture which contains $2 \times 10^6$ c.f.u of 2,759 defferent mutants. |
| 2nd subset composite collection | composite collection of 2nd subset, Col <sup>r</sup> and Gm <sup>r</sup> , consist of 10 $\mu$ l bacterium culture which contains $2 \times 10^6$ c.f.u of 2,235 defferent mutants. |
| 4th subset composite collection | composite collection of 4th subset, Col <sup>r</sup> and Gm <sup>r</sup> , consist of 10 $\mu$ l bacterium culture which contains $2 \times 10^6$ c.f.u of 2,305 defferent mutants. |

**Table S8 Conditional essential genes grown in DMEM medium**

| Gene_ID   | Gene | Annotation-nr                                                | No.TA | LB_01 | LB_02 | LB_03 | DMEM_01     | DMEM_02     | DMEM_03     | DMEM/LB      | P value     |
|-----------|------|--------------------------------------------------------------|-------|-------|-------|-------|-------------|-------------|-------------|--------------|-------------|
| ETAE_0075 | waaQ | heptosyl III transferase                                     | 45    | 260   | 311   | 282   | 37.63220892 | 35.31304348 | 43.93939988 | -2.856865972 | 8.37407E-05 |
| ETAE_0076 | walW | lipopolysaccharide biosynthesis                              | 46    | 211   | 178   | 154   | 26.22850925 | 20.50434783 | 18.69759144 | -3.033742991 | 0.000673513 |
| ETAE_0078 | walR | putative glycosyltransferase                                 | 52    | 254   | 259   | 309   | 45.61479869 | 64.93043478 | 33.65566459 | -2.503221036 | 0.000337238 |
| ETAE_0079 | wabK | putative glycosyltransferase                                 | 78    | 161   | 172   | 160   | 24.28988003 | 16.5173913  | 15.61248885 | -3.104561798 | 6.61277E-06 |
| ETAE_0083 | rfaD | ADP-L-glycero-D-manno-heptose-6-epimerase                    | 45    | 3     | 2     | 4     | 0.540369967 | 0           | 0.934879572 | -2.008433752 | 0.015635015 |
| ETAE_0185 | purD | phosphoribosylamine-glycine ligase                           | 37    | 227   | 225   | 199   | 42.19368879 | 52.4        | 47.67885816 | -2.186744767 | 5.48257E-05 |
| ETAE_0186 | purH | phosphoribosylaminoimidazolecarboxamide formyltransferase/Im | 51    | 780   | 741   | 680   | 167.6343852 | 119.6086957 | 153.3202498 | -2.318332308 | 5.38948E-05 |
| ETAE_0204 | pgi  | glucose-6-phosphate isomerase                                | 60    | 50    | 45    | 55    | 13.68443961 | 12.53043478 | 7.479036574 | -2.118770112 | 0.000377832 |
| ETAE_0246 | 0    | hypothetical protein                                         | 9     | 222   | 272   | 288   | 3.421109902 | 4.556521739 | 3.739518287 | -5.943288669 | 0.000204106 |
| ETAE_0358 | purA | adenylosuccinate synthase                                    | 48    | 52    | 46    | 64    | 13.68443961 | 12.53043478 | 12.15343443 | -2.052408584 | 0.001674465 |
| ETAE_0368 | rpII | 50S ribosomal protein L9                                     | 15    | 32    | 25    | 36    | 1.140369967 | 4.556521739 | 2.804638715 | -3.296101516 | 0.001275789 |
| ETAE_0459 | folB | bifunctional dihydroneopterin aldolase/dihydroneopterin tri  | 10    | 40    | 31    | 37    | 2.280739935 | 1.139130435 | 1.869759144 | -4.114148411 | 0.000221066 |
| ETAE_0593 | carA | carbamoylphosphate synthase small subunit                    | 26    | 183   | 168   | 180   | 46.75516866 | 43.28695652 | 32.72078501 | -2.105702307 | 2.44036E-05 |
| ETAE_0594 | carB | carbamoylphosphate synthase large subunit                    | 89    | 1,304 | 1,340 | 1,268 | 366.0587595 | 389.5826087 | 203.8037467 | -2.026405802 | 9.22999E-05 |
| ETAE_0771 | pspE | rhodanese-related sulfurtransferase                          | 9     | 292   | 304   | 258   | 55.44069641 | 40.49565217 | 39.74843889 | -2.653415605 | 0.000519648 |
| ETAE_0774 | purL | phosphoribosylformylglycinamide synthase                     | 74    | 1,631 | 1,646 | 1,640 | 458.4287269 | 439.7043478 | 330.0124888 | -2.000454698 | 6.86623E-06 |
| ETAE_0796 | proB | gamma-glutamyl kinase                                        | 27    | 260   | 265   | 263   | 60.43960827 | 54.67826087 | 56.09277431 | -2.19596383  | 1.01296E-07 |
| ETAE_0797 | proA | gamma-glutamyl phosphate reductase                           | 24    | 436   | 470   | 423   | 84.38737758 | 67.20869565 | 75.72524532 | -2.54196643  | 1.66033E-05 |
| ETAE_0802 | 0    | hypothetical protein                                         | 8     | 225   | 226   | 197   | 28.50924918 | 35.31304348 | 35.52542373 | -2.693134931 | 4.85458E-05 |
| ETAE_0808 | 0    | hypothetical protein                                         | 3     | 38    | 61    | 43    | 10.52665941 | 12.66956522 | 11.89295272 | -2.113968356 | 0.013236919 |
| ETAE_0837 | 0    | putative phospholipid biosynthesis acyltransferase           | 26    | 473   | 452   | 476   | 119.3014146 | 110.6173913 | 118.3621766 | -2.211522028 | 5.18511E-05 |
| ETAE_0891 | 0    | hypothetical protein                                         | 6     | 12    | 14    | 6     | 1.140369967 | 1.417391304 | 2.804638715 | -2.562229382 | 0.030152916 |
| ETAE_1010 | acrB | RND family, acridine/multidrug efflux pump/acriflavin resist | 104   | 809   | 875   | 824   | 84.38737758 | 103.6608696 | 114.0553078 | -3.049164806 | 4.70073E-06 |
| ETAE_1011 | acrA | efflux transporter, RND family, MFP subunit                  | 42    | 458   | 423   | 424   | 109.4755169 | 63.79130435 | 99.09723461 | -2.256245111 | 4.39294E-05 |
| ETAE_1020 | dnaX | DNA polymerase III, subunits gamma and tau                   | 34    | 20    | 28    | 23    | 1.140369967 | 1.139130435 | 4.674397859 | -3.166150504 | 0.001156244 |
| ETAE_1053 | purB | adenylosuccinate lyase                                       | 29    | 344   | 300   | 333   | 66.14145811 | 54.67826087 | 67.31132917 | -2.369860097 | 4.67743E-05 |
| ETAE_1086 | purM | phosphoribosylformylglycinamide cyclo-ligase                 | 20    | 307   | 300   | 318   | 77.54515778 | 67.20869565 | 68.24620874 | -2.119736111 | 2.70844E-06 |
| ETAE_1098 | purC | phosphoribosylaminoimidazole-succinocarboxamide synth        | 17    | 132   | 138   | 158   | 21.66702938 | 46.70434783 | 36.4603033  | -2.016136161 | 0.000540506 |
| ETAE_1248 | pyrD | dihydrodrotate dehydrogenase 2                               | 47    | 187   | 231   | 209   | 39.91294886 | 58.09565217 | 43.0044603  | -2.145275549 | 0.000316366 |
| ETAE_1520 | 0    | ferritin Dps family protein                                  | 22    | 877   | 892   | 871   | 106.054407  | 186.8173913 | 208.4781445 | -2.394696475 | 2.33859E-05 |
| ETAE_1563 | 0    | hypothetical protein                                         | 7     | 166   | 190   | 173   | 40.43960827 | 39.23478261 | 34.50669045 | -2.014143443 | 9.14137E-05 |
| ETAE_1689 | pdxH | pyridoxamine 5'-phosphate oxidase                            | 20    | 27    | 21    | 13    | 1.140369967 | 1.139130435 | 5.609277431 | -2.812698256 | 0.014153307 |
| ETAE_1867 | pspA | lock protein A (IM30), suppresses sigma54-dependent tran     | 10    | 715   | 705   | 688   | 21.66702938 | 38.73043478 | 44.87421945 | -4.310206022 | 3.81692E-07 |
| ETAE_1894 | 0    | hypothetical protein                                         | 11    | 1,203 | 1,245 | 1,143 | 86.66811752 | 72.90434783 | 101.9018733 | -3.774829304 | 3.48145E-06 |
| ETAE_1951 | wza  | polysaccharide export-related protein                        | 14    | 1,372 | 1,373 | 1,295 | 117.4581066 | 76.32173913 | 125.2738626 | -3.658414808 | 2.03634E-06 |
| ETAE_1961 | 0    | hypothetical protein                                         | 11    | 75    | 84    | 75    | 9.122959739 | 9.113043478 | 5.609277431 | -3.244205294 | 2.74928E-05 |
| ETAE_2082 | pyrF | OMP decarboxylase; OMPDCase; OMPdecase                       | 16    | 87    | 76    | 74    | 23.94776931 | 19.36521739 | 14.95807315 | -2.003738305 | 0.000250875 |
| ETAE_2138 | 0    | hypothetical protein                                         | 8     | 244   | 245   | 309   | 25.08813928 | 18.22608696 | 31.78590544 | -3.392868407 | 0.00038499  |
| ETAE_2159 | mukE | condesin subunit E                                           | 22    | 2     | 3     | 1     | 0           | 0           | 0           | -2.885963624 | 0.021610065 |
| ETAE_2160 | mukF | chromosome segregation and condensation protein              | 46    | 6     | 9     | 7     | 1.140369967 | 0           | 0.934879572 | -2.883327261 | 0.001283873 |
| ETAE_2256 | 0    | hypothetical protein                                         | 22    | 3     | 4     | 4     | 0           | 0           | 0           | -3.566250389 | 0.000585947 |
| ETAE_2262 | 0    | hypothetical protein                                         | 12    | 9     | 9     | 7     | 0           | 0           | 0           | -4.683175648 | 0.000117254 |
| ETAE_2274 | 0    | hypothetical protein                                         | 2     | 8     | 6     | 5     | 1.280739935 | 1.27826087  | 1.869759144 | -2.653415605 | 0.010712579 |
| ETAE_2391 | 0    | aminotransferase class I and II                              | 31    | 539   | 597   | 548   | 139.125136  | 119.6086957 | 82.26940232 | -2.300582757 | 5.34221E-05 |
| ETAE_2409 | purF | amidophosphoribosyltransferase                               | 56    | 996   | 1,017 | 881   | 249.7410229 | 213.0173913 | 164.5388046 | -2.20403196  | 0.000103139 |
| ETAE_2519 | 0    | hypothetical protein                                         | 14    | 582   | 477   | 690   | 21.66702938 | 29.6173913  | 35.52542373 | -4.316392181 | 0.000853337 |
| ETAE_2700 | purE | phosphoribosylaminoimidazole carboxylase catalytic subu      | 8     | 57    | 54    | 54    | 13.68443961 | 17.08695652 | 8.413916146 | -2.047184308 | 0.000102292 |
| ETAE_2701 | purK | phosphoribosylaminoimidazole carboxylase                     | 22    | 285   | 245   | 254   | 65.00108814 | 95.68695652 | 34.59054416 | -2.000616641 | 0.000776871 |
| ETAE_2736 | 0    | inorganic polyphosphate/ATP-NAD kinase                       | 23    | 10    | 4     | 7     | 0           | 1.139130435 | 63.94879572 | -2.866993196 | 0.01891615  |
| ETAE_3124 | pyrI | aspartate carbamoyltransferase regulatory subunit            | 9     | 241   | 257   | 273   | 60.43960827 | 58.09565217 | 63.57181088 | -2.076427757 | 3.19329E-05 |
| ETAE_3125 | pyrB | aspartate carbamoyltransferase                               | 24    | 369   | 364   | 387   | 78.68552775 | 58.09565217 | 44.87421945 | -2.616665381 | 1.3228E-05  |
| ETAE_3261 | aroK | shikimate kinase I                                           | 12    | 15    | 10    | 17    | 0           | 2.27826087  | 3.739518287 | -2.569333197 | 0.008092284 |

**Table S9 Conditional essential genes grown in J774A.1 cells**

| Gene_ID   | Gene  | Annotation-nr                              | No.TA | Input_01 | Input_02    | Input_03    | J774A.1_01 | J774A.1_02  | J774A.1_03  | J774A.1/Input | P value     |
|-----------|-------|--------------------------------------------|-------|----------|-------------|-------------|------------|-------------|-------------|---------------|-------------|
| ETAE_0147 | ubiE  | ubiquinone/menaquinone biosynt             | 30    | 337      | 245.3632144 | 364.569027  | 52         | 49.01921317 | 17.51487414 | -2.98699558   | 0.001843319 |
| ETAE_0217 | ubiA  | 4-hydroxybenzoate polyprenyltr             | 26    | 10       | 11.10240789 | 4.873917473 | 1          | 0           | 1.251062439 | -3.07361928   | 0.016011176 |
| ETAE_0228 | citA  | sensor histidine kinase                    | 51    | 15,575   | 15291.34639 | 14869.34743 | 2179       | 2095.571363 | 2468.346192 | -2.761697089  | 6.29927E-07 |
| ETAE_0314 | groEL | chaperonin GroEL (HSP60 family             | 49    | 112      | 145.4415434 | 113.0748854 | 8          | 12.25480329 | 66.30630925 | -2.086046428  | 0.012039748 |
| ETAE_0340 | poxA  | lysyl-tRNA synthetase, class II            | 27    | 6        | 4.440963156 | 2.924350484 | 0          | 1.750686185 | 0           | -2.40826283   | 0.024368157 |
| ETAE_0345 |       | hypothetical protein                       | 8     | 8        | 6.661444735 | 6.823484463 | 1          | 0           | 0           | -3.510960361  | 0.000370855 |
| ETAE_0348 |       | putative ATPase                            | 19    | 15       | 9.992167102 | 7.798267957 | 0          | 0           | 1.251062439 | -3.888652536  | 0.006983543 |
| ETAE_0381 | fbp   | fructose-1,6-bisphosphatase                | 38    | 1,127    | 1101.358863 | 1073.236628 | 311        | 248.5974382 | 226.4423014 | -2.068955919  | 9.30721E-06 |
| ETAE_0405 | infB  | translation initiation factor 2            | 73    | 2        | 1.110240789 | 3.899133979 | 0          | 0           | 0           | -3.015807311  | 0.044556486 |
| ETAE_0409 | pnp   | polyribonucleotide nucleotidyltran         | 66    | 223      | 135.4493763 | 180.3349465 | 31         | 26.26029277 | 12.51062439 | -2.93240182   | 0.003842202 |
| ETAE_0494 |       | conserved hypothetical protein             | 34    | 2,133    | 2167.19002  | 2076.288844 | 422        | 434.1701738 | 321.5230467 | -2.435754806  | 2.58749E-06 |
| ETAE_0578 | nhaA  | Na <sup>+</sup> /H <sup>+</sup> antiporter | 31    | 9        | 3.330722367 | 11.69740194 | 0          | 0           | 0           | -4.665765179  | 0.010336263 |
| ETAE_0600 | ksgA  | dimethyladenosine transferase (rf          | 19    | 45       | 68.83492892 | 49.71395823 | 3          | 7.002744739 | 8.757437071 | -3.055157261  | 0.003097679 |
| ETAE_0735 | glnD  | Pil uridylyl-transferase                   | 67    | 59       | 97.70118944 | 111.1253184 | 17         | 5.252058554 | 27.54037267 | -2.428617931  | 0.029865787 |
| ETAE_0743 | cdsA  | CDP-diglyceride synthetase                 | 25    | 15       | 11.10240789 | 3.899133979 | 0          | 0           | 0           | -4.933236128  | 0.034874421 |
| ETAE_0859 | esaH  | putative type III secretion apparat        | 6     | 326      | 445.2065564 | 463.9969435 | 35         | 43.76715462 | 61.3020595  | -3.131867732  | 0.00122871  |
| ETAE_0860 | esaG  | putative type III secretion system         | 7     | 1,716    | 1646.48709  | 1628.86322  | 298        | 320.3755718 | 130.1104936 | -2.735750711  | 2.74968E-05 |
| ETAE_0861 | esrC  | putative transcriptional regulator         | 19    | 9,378    | 9548.070786 | 9813.145441 | 833        | 835.0773102 | 870.7394573 | -3.500291293  | 2.68861E-04 |
| ETAE_0881 | esaS  | type III secretion apparatus               | 6     | 1,971    | 2061.717145 | 2830.771268 | 475        | 540.9620311 | 582.9950964 | -2.101048748  | 0.003078484 |
| ETAE_0882 | esaT  | type III secretion system EscT ho          | 24    | 8,523    | 8790.886568 | 10104.60571 | 1309       | 1253.491308 | 942.0500163 | -2.967488623  | 9.18513E-05 |
| ETAE_0883 | esaU  | type III secretion system EscU ho          | 24    | 25,085   | 23348.36379 | 25658.25115 | 1773       | 1685.910796 | 2047.989212 | -3.749764336  | 5.33059E-06 |
| ETAE_0884 |       | putative transglycosylase signal p         | 29    | 22,079   | 22106.00435 | 23736.95283 | 1780       | 1755.938243 | 2249.410265 | -3.553164088  | 3.45632E-06 |
| ETAE_0885 | esrA  | two-component sensor/regulator             | 69    | 28,010   | 26593.59762 | 27164.29165 | 2687       | 2718.815645 | 3121.400785 | -3.261240893  | 6.01382E-07 |
| ETAE_0886 | esrB  | two-component sensor/regulator             | 15    | 3,963    | 3894.724688 | 3782.159959 | 423        | 395.6550778 | 499.173913  | -3.141890979  | 5.98632E-07 |
| ETAE_0956 | ahpC  | alkyl hydroperoxide reductase, sn          | 23    | 82       | 81.0475776  | 115.9992359 | 1          | 3.50137237  | 48.79143511 | -2.367407153  | 0.017561024 |
| ETAE_0975 | ribH  | riboflavin synthase beta-chain             | 14    | 3        | 5.551203945 | 2.924350484 | 0          | 0           | 0           | -3.654629928  | 0.010241266 |
| ETAE_0981 | xseB  | exonuclease VII small subunit              | 6     | 193      | 203.1740644 | 212.5028018 | 40         | 26.26029277 | 48.79143511 | -2.394045236  | 4.34837E-05 |
| ETAE_0982 | thil  | thiamine biosynthesis ATP pyropl           | 41    | 622      | 659.4830287 | 643.3571065 | 116        | 140.0548948 | 125.1062439 | -2.332897594  | 2.46509E-06 |
| ETAE_1011 | acrA  | efflux transporter, RND family, Mf         | 42    | 1,836    | 1708.660574 | 1838.441671 | 397        | 409.6605672 | 455.4717228 | -2.092453133  | 3.56829E-05 |
| ETAE_1179 |       | hypothetical protein                       | 3     | 1        | 3.330722367 | 3.899133979 | 0          | 0           | 0           | -3.212450606  | 0.034395192 |
| ETAE_1207 | neuB  | sialic acid synthase                       | 81    | 246      | 253.1348999 | 194.9566989 | 15         | 24.50960659 | 96.33180778 | -2.39344416   | 0.004132014 |
| ETAE_1258 |       | hypothetical protein                       | 6     | 27       | 38.85842762 | 23.39480387 | 6          | 3.50137237  | 7.012749264 | -2.434590438  | 0.020812777 |
| ETAE_1439 | ruvA  | holliday junction resolvosome, DN          | 10    | 25       | 26.64577894 | 12.67218543 | 1          | 0           | 3.753187316 | -3.503834232  | 0.011998685 |
| ETAE_1489 |       | hypothetical protein                       | 9     | 85       | 89.92950392 | 75.05832909 | 0          | 0           | 60.05099706 | -2.040847657  | 0.003658424 |
| ETAE_1518 | cls   | cardiolipin synthetase                     | 50    | 214      | 235.3710473 | 269.0402445 | 19         | 17.50686185 | 50.04249755 | -3.038873742  | 0.000391098 |
| ETAE_1553 | cysB  | transcriptional regulator                  | 35    | 22       | 8.881926313 | 10.72261844 | 1          | 0           | 0           | -4.407065168  | 0.029325456 |
| ETAE_1554 | ospC  | cold shock protein                         | 6     | 67       | 44.40963156 | 97.47834947 | 4          | 8.753430924 | 33.77868585 | -2.139344416  | 0.039699662 |
| ETAE_1617 |       | hypothetical protein                       | 5     | 68       | 66.61444735 | 41.91569027 | 11         | 8.753430924 | 16.27231121 | -2.289212007  | 0.012457067 |
| ETAE_1654 |       | hypothetical protein                       | 5     | 34       | 23.31505657 | 32.16785532 | 4          | 0           | 2.502124877 | -3.597042675  | 0.001458571 |
| ETAE_1675 |       | hypothetical protein                       | 5     | 59       | 31.08674209 | 34.11742231 | 6          | 5.252058554 | 12.01699902 | -2.419068426  | 0.037475334 |
| ETAE_1725 |       | chain length determinant protein           | 60    | 131      | 95.48070786 | 88.70529801 | 7          | 1.750686185 | 27.52337365 | -3.084356147  | 0.003691597 |
| ETAE_1787 |       | hypothetical protein                       | 17    | 98       | 61.0623434  | 52.63830871 | 12         | 5.252058554 | 31.27656097 | -2.100472168  | 0.026801951 |
| ETAE_1792 | aroH  | 3-deoxy-7-phosphoheptulonate sy            | 25    | 208      | 112.1343197 | 185.208864  | 29         | 22.7589204  | 36.28081072 | -2.507241479  | 0.008836873 |
| ETAE_1831 |       | hypothetical protein                       | 5     | 11       | 33.30722367 | 20.47045339 | 0          | 0           | 0           | -6.048996085  | 0.026652392 |
| ETAE_1906 |       | hypothetical protein                       | 33    | 1,832    | 2100.575573 | 1334.478604 | 300        | 309.8714547 | 447.8803531 | -2.315023038  | 0.003620538 |
| ETAE_1967 |       | HpcH/Hpal aldolase family protein          | 9     | 116      | 113.2445605 | 68.23484463 | 9          | 10.50411711 | 32.55312194 | -2.516609241  | 0.03758009  |
| ETAE_2030 |       | hypothetical protein                       | 10    | 21       | 18.87409341 | 7.798267957 | 0          | 1.750686185 | 0           | -4.138930251  | 0.020389422 |
| ETAE_2176 | cmk   | cytidylate kinase                          | 19    | 9        | 2.220481578 | 7.798267957 | 0          | 0           | 0           | -4.34859903   | 0.040666975 |
| ETAE_2305 |       | hypothetical protein                       | 7     | 57       | 59.95300261 | 75.05832909 | 12         | 14.00548948 | 13.77018634 | -2.272479392  | 0.002027673 |
| ETAE_2374 | nuoM  | NADH:ubiquinone oxidoreductase             | 45    | 106      | 153.2132289 | 184.2340805 | 17         | 15.75617566 | 45.03824779 | -2.495901617  | 0.007809592 |
| ETAE_2376 | nuoK  | NADH:ubiquinone oxidoreductase             | 7     | 28       | 34.41746446 | 40.94090678 | 5          | 8.753430924 | 8.757437071 | -2.199844664  | 0.002320357 |
| ETAE_2377 | nuoJ  | NADH:ubiquinone oxidoreductase             | 12    | 43       | 72.16565129 | 76.03311258 | 0          | 0           | 15.01274926 | -3.582410392  | 0.007401223 |
| ETAE_2381 | nuoF  | NADH:ubiquinone oxidoreductase             | 29    | 81       | 74.38613287 | 94.55399898 | 5          | 5.252058554 | 8.757437071 | -3.648998663  | 0.000220093 |
| ETAE_2383 | nuoD  | NADH:ubiquinone oxidoreductase             | 49    | 220      | 229.8198433 | 233.9480387 | 2          | 3.50137237  | 135.1147434 | -2.274364101  | 0.014988342 |
| ETAE_2385 | nuoA  | NADH:ubiquinone oxidoreductase             | 15    | 22       | 27.75601973 | 39.96612328 | 5          | 8.753430924 | 1.251062439 | -2.500223919  | 0.012525015 |
| ETAE_2412 | folC  | bifunctional folylpolyglutamate sy         | 31    | 8        | 11.10240789 | 17.5461029  | 1          | 3.50137237  | 1.251062439 | -2.491135459  | 0.021687059 |
| ETAE_2549 |       | hypothetical protein                       | 6     | 19       | 28.86626052 | 36.0669893  | 2          | 0           | 0           | -4.818341079  | 0.005853485 |
| ETAE_2650 | lipA  | lipote synthase                            | 16    | 24       | 22.20481578 | 18.5208864  | 0          | 0           | 1.251062439 | -4.865709546  | 0.000210904 |
| ETAE_2745 |       | phage/plasmid primase                      | 3     | 45       | 59.95300261 | 51.66352522 | 13         | 10.50411711 | 12.51487414 | -2.117579482  | 0.001483348 |
| ETAE_2858 | sdhC  | succinate dehydrogenase cytochr            | 7     | 109      | 65.50420656 | 45.81482425 | 7          | 7.002744739 | 8.757437071 | -3.220389352  | 0.024439934 |
| ETAE_2859 | alaS  | alanyl-tRNA synthetase                     | 72    | 12       | 15.54337105 | 10.72261844 | 1          | 0           | 1.251062439 | -3.61155638   | 0.001134151 |
| ETAE_2873 | rpoS  | RNA polymerase sigma factor                | 24    | 830      | 749.4125326 | 865.6077433 | 42         | 31.51235133 | 41.28506048 | -4.401035826  | 2.32167E-05 |
| ETAE_3055 |       | truncated integrase                        | 5     | 11       | 13.32288947 | 17.5461029  | 1          | 1.750686185 | 5.004249755 | -2.306271159  | 0.00621337  |
| ETAE_3147 |       | hypothetical protein                       | 7     | 113      | 87.70902234 | 86.75573102 | 26         | 15.75617566 | 6.255312194 | -2.558665358  | 0.001539308 |
| ETAE_3211 | secY  | preprotein translocase subunit Se          | 67    | 11       | 33.30722367 | 23.39480387 | 0          | 0           | 0           | -6.111348871  | 0.022930809 |
| ETAE_3474 |       | transcriptional regulator, TetR fan        | 19    | 14,913   | 14799.50972 | 15576.06546 | 3132       | 3119.722781 | 2394.533508 | -2.388865778  | 3.73911E-06 |
| ETAE_3539 | pstC  | ABC-type phosphate transport sy            | 37    | 195      | 178.748767  | 160.8392766 | 58         | 43.02470265 | 15.01274926 | -2.204925796  | 0.001870957 |

Table S10 Conditional essential genes grown in turbot

| Gene_ID   | Gene | Annotation-nr                                                          | No. TA | Input_01   | Input_02  | Input_03  | Turbot_01 | Turbot_02 | Turbot_03 | Turbot/Input P value |           |
|-----------|------|------------------------------------------------------------------------|--------|------------|-----------|-----------|-----------|-----------|-----------|----------------------|-----------|
| ETAE_0023 |      | conserved hypothetical protein                                         | 20     | 1058.3721  | 1049.0489 | 1100.714  | 28.6      | 70.41     | 15.9      | -4.767325            | 1.452E-06 |
| ETAE_0026 |      | glIS Na <sup>+</sup> /glutamate symporter                              | 35     | 684.67741  | 628.76223 | 643.16231 | 205.43    | 132.02    | 101.76    | -2.147757            | 0.000134  |
| ETAE_0074 | waaG | lipopolysaccharide core biosynthesis protein                           | 40     | 181.2634   | 175.95336 | 85.25138  | 18.01     | 14.62     | 13.14     | -3.191256            | 0.013268  |
| ETAE_0075 | waaQ | heptosyl III transferase                                               | 45     | 353.07706  | 332.72696 | 372.30033 | 64.09     | 102.28    | 89.35     | -2.036103            | 7.522E-05 |
| ETAE_0076 | walW | lipopolysaccharide biosynthesis                                        | 46     | 133.15558  | 129.25484 | 112.22967 | 16.22     | 20.61     | 18.16     | -2.703136            | 8.352E-05 |
| ETAE_0101 |      | rfe UDP-N-acetylmuramyl pentapeptide phosphotransferase                | 50     | 2675.9977  | 2650.975  | 2437.7578 | 52.01     | 44.01     | 85.86     | -5.392832            | 5.048E-06 |
| ETAE_0103 | wecB | UDP-N-acetylglucosamine 2-epimerase                                    | 35     | 627.11984  | 668.78953 | 675.53625 | 91.01     | 28.61     | 111.3     | -3.077361            | 3.747E-05 |
| ETAE_0104 | wecC | UDP-N-acetyl-D-mannosaminuronate dehydrogenase                         | 31     | 525.74978  | 607.08077 | 547.11962 | 104.01    | 138.63    | 130.38    | -2.162111            | 8.002E-05 |
| ETAE_0105 | rftB | rTDP-D-glucose 4,6-dehydratase                                         | 36     | 768.00703  | 806.38339 | 858.98859 | 62.41     | 66.01     | 60.42     | -3.666763            | 9.255E-06 |
| ETAE_0106 | rftA | glucose-1-phosphate thymidyllyltransferase                             | 30     | 391.73513  | 376.08987 | 403.59514 | 13        | 4.4       | 9.54      | -5.293731            | 1.371E-06 |
| ETAE_0107 | wecD | TDP-D-fucosamine acetyltransferase                                     | 15     | 214.76707  | 219.31627 | 226.61759 | 5.2       | 0         | 0         | -6.338766            | 5.846E-07 |
| ETAE_0108 | wecE | TDP-4-oxo-6-deoxy-D-glucose transaminase                               | 38     | 814.39672  | 751.34585 | 875.17556 | 13        | 15.4      | 0         | -6.282288            | 2.396E-05 |
| ETAE_0109 | wzxE | membrane protein involved in the export of O-antigen and teichoic acid | 45     | 21.476707  | 39.193402 | 21.582628 | 2.6       | 0         | 0         | -3.928247            | 0.011494  |
| ETAE_0110 | wecF | 4-alpha-L-fucosyltransferase                                           | 31     | 492.24612  | 497.00569 | 459.70997 | 15.6      | 0         | 3.18      | -6.058856            | 2.96E-06  |
| ETAE_0112 | wecG | UDP-N-acetyl-D-mannosaminuronic acid transferase                       | 25     | 1117.6478  | 1102.4187 | 1019.7792 | 241.83    | 195.84    | 171.72    | -2.404738            | 1.821E-05 |
| ETAE_0121 |      | putative lipoprotein                                                   | 6      | 66.148257  | 60.874858 | 69.064409 | 10.4      | 0         | 0         | -3.893098            | 0.0001251 |
| ETAE_0126 | uvrD | DNA-dependent helicase II                                              | 62     | 1102.1846  | 1097.4152 | 1130.9297 | 161.22    | 44.01     | 254.4     | -2.84912             | 0.0001013 |
| ETAE_0131 | recQ | ATP-dependent DNA helicase                                             | 54     | 1637.3841  | 1729.5131 | 1638.1215 | 411.99    | 452.54    | 273.44    | -2.133979            | 3.214E-05 |
| ETAE_0137 | zntA | zinc/cadmium/mercury/lead-transporting ATPase                          | 43     | 1553.1954  | 1618.6041 | 1587.4023 | 465.46    | 107.82    | 407.05    | -2.275881            | 0.0003606 |
| ETAE_0147 | ubiE | ubiquinone/menaquinone biosynthesis methyltransferase                  | 30     | 238.82098  | 226.82139 | 240.6463  | 5.2       | 8.8       | 3.18      | -5.135375            | 9.939E-07 |
| ETAE_0151 | tatB | Sec-independent protein secretion pathway component                    | 8      | 183.84061  | 205.97383 | 208.27236 | 52.01     | 33.01     | 54.06     | -2.08087             | 0.0001185 |
| ETAE_0152 | tatC | twin arginine-targeting protein translocase                            | 27     | 2030.8374  | 2067.2435 | 2218.6941 | 725.5     | 189.23    | 343.45    | -2.325099            | 0.0005729 |
| ETAE_0158 | fre  | FMN reductase                                                          | 23     | 77.316144  | 72.549488 | 74.460066 | 5.2       | 0         | 12.72     | -3.441806            | 6.336E-05 |
| ETAE_0185 | purD | phosphoribosylamine-glycine ligase                                     | 37     | 853.91386  | 869.75995 | 887.04601 | 137.82    | 211.24    | 149.46    | -2.381725            | 9.029E-06 |
| ETAE_0186 | purH | bifunctional phosphoribosylaminoimidazolecarboxamide formyltransferase | 51     | 1780.8485  | 1819.5745 | 1810.7825 | 161.22    | 402.67    | 181.26    | -2.85535             | 3.779E-05 |
| ETAE_0204 | pgi  | glucose-6-phosphate isomerase                                          | 60     | 47.248755  | 42.52901  | 57.193964 | 11.4      | 13        | 9.5       | -2.022998            | 0.0010548 |
| ETAE_0220 | dgkA | diacylglycerol kinase                                                  | 12     | 688.11368  | 659.61661 | 773.73721 | 101.41    | 178.23    | 76.32     | -2.565206            | 0.0002151 |
| ETAE_0340 | poxA | lysyl-tRNA synthetase, class II                                        | 27     | 19.75867   | 17.511945 | 9.7121826 | 5.2       | 0         | 3.18      | -2.134928            | 0.0193541 |
| ETAE_0341 |      | putative membrane transport protein                                    | 67     | 1832.3926  | 1883.785  | 1783.8042 | 440.87    | 363.07    | 499.27    | -2.077357            | 2.351E-05 |
| ETAE_0351 | miaA | tRNA delta(2)-isopentenylpyrophosphate transferase                     | 21     | 35.221799  | 35.857793 | 52.877438 | 7.8       | 0         | 12.72     | -2.43238             | 0.0073778 |
| ETAE_0360 | mr   | exoribonuclease R                                                      | 72     | 3864.9481  | 3793.4209 | 3534.1553 | 731.15    | 992.38    | 878.04    | -2.103805            | 2.203E-05 |
| ETAE_0379 |      | conserved hypothetical protein                                         | 16     | 156.35042  | 141.76337 | 140.28708 | 52.01     | 28.61     | 15.9      | -2.149031            | 0.000633  |
| ETAE_0384 | argR | arginine repressor                                                     | 13     | 42.953413  | 50.868032 | 62.589621 | 2.6       | 13.2      | 12.72     | -2.338412            | 0.003075  |
| ETAE_0396 | greA | transcription elongation factor                                        | 9      | 322.1506   | 316.04892 | 296.76113 | 83.21     | 88.82     | 54.06     | -2.048008            | 0.0003635 |
| ETAE_0397 | yhbY | RNA-binding protein                                                    | 6      | 67.007325  | 58.373151 | 33.453073 | 0         | 0         | 3.18      | -4.71076             | 0.0068413 |
| ETAE_0406 | rftA | ribosome-binding factor A                                              | 11     | 18.899502  | 22.515358 | 34.532205 | 0         | 6.6       | 4.72      | -2.74612             | 0.0343798 |
| ETAE_0409 | npl  | polyribonucleotide nucleotidyltransferase                              | 66     | 61.852915  | 60.040956 | 69.064409 | 2.6       | 0         | 3.18      | -4.465382            | 2.978E-05 |
| ETAE_0410 | nlpI | lipoprotein NlpI, contains TPR repeats                                 | 47     | 572.13947  | 538.7008  | 544.96135 | 132.62    | 96.82     | 101.76    | -2.311358            | 8.343E-06 |
| ETAE_0411 | deaD | ATP-dependent RNA helicase                                             | 53     | 538.6358   | 509.51422 | 502.87523 | 117.02    | 72.61     | 118.54    | -2.320235            | 2.427E-05 |
| ETAE_0412 |      | hypothetical protein                                                   | 7      | 32.644594  | 35.857793 | 22.661759 | 10.4      | 4.4       | 3.18      | -2.166163            | 0.0058712 |
| ETAE_0479 | prfC | peptide chain release factor RF-3                                      | 50     | 113.39701  | 103.40387 | 123.02098 | 0         | 0         | 0         | -6.836353            | 3.687E-05 |
| ETAE_0488 | deoB | phosphopentomutase                                                     | 40     | 1005.1099  | 1015.6928 | 1095.3184 | 249.63    | 211.24    | 265.71    | -2.100558            | 0.0001505 |
| ETAE_0494 |      | conserved hypothetical protein                                         | 34     | 301.53296  | 316.88282 | 334.53073 | 96.21     | 24.2      | 111.3     | -2.026051            | 0.0010837 |
| ETAE_0497 | rpoN | RNA polymerase factor sigma-54                                         | 43     | 734.50337  | 761.35267 | 721.9389  | 52.01     | 55.01     | 143.1     | -3.133183            | 3.37E-05  |
| ETAE_0501 | kdsC | 3-deoxy-D-manno-oculosonate 8-phosphate phosphatase                    | 14     | 13.15558   | 125.91923 | 111.15053 | 62.41     | 0         | 15.9      | -2.198542            | 0.0079791 |
| ETAE_0502 | yrbH | D-arabinose 5-phosphate isomerase                                      | 24     | 161.50483  | 179.28896 | 213.66802 | 43.21     | 35.21     | 47.7      | -2.110161            | 0.0008186 |
| ETAE_0517 | sspA | stringent starvation protein A                                         | 18     | 126.28304  | 136.75995 | 106.83401 | 2.6       | 2.2       | 25.44     | -3.487708            | 0.0006291 |
| ETAE_0530 |      | hypothetical protein                                                   | 10     | 188.99502  | 175.11945 | 160.79058 | 26        | 6.6       | 28.62     | -3.039184            | 0.0001336 |
| ETAE_0543 | trpR | Trp operon repressor                                                   | 8      | 123.70583  | 150.10239 | 132.73316 | 26        | 36.01     | 25.44     | -2.216872            | 0.0034108 |
| ETAE_0570 | talB | transaldolase B                                                        | 34     | 542.07208  | 527.86007 | 637.76665 | 111.82    | 33.01     | 50.88     | -3.105849            | 0.0002753 |
| ETAE_0600 | ksGA | dimethyladenosine transferase (RNA methylation)                        | 23     | 23.194843  | 26.684869 | 16.186971 | 0         | 0         | 0         | -4.524956            | 0.0020409 |
| ETAE_0601 | pdxA | 4-hydroxythreonine-4-phosphate dehydrogenase                           | 32     | 106.52447  | 121.74972 | 111.15053 | 0         | 0         | 0         | -6.834681            | 1.494E-05 |
| ETAE_0618 | leuD | 3-isopropylmalate dehydratase small subunit                            | 17     | 376.2719   | 376.08987 | 367.98381 | 123.45    | 77.25     | 64.63     | -2.065722            | 9.474E-05 |
| ETAE_0627 | fruR | DNA-binding transcriptional regulator                                  | 35     | 370.25842  | 356.91013 | 426.2569  | 49.41     | 129.82    | 47.7      | -2.330406            | 0.0008546 |
| ETAE_0629 | mraW | S-adenosyl-methyltransferase                                           | 22     | 142.60533  | 128.42093 | 96.042694 | 0         | 0         | 12.72     | -4.557121            | 0.0012091 |
| ETAE_0644 |      | conserved hypothetical protein                                         | 17     | 97.933783  | 108.40728 | 131.65403 | 39.01     | 13.2      | 6.36      | -2.469452            | 0.0027042 |
| ETAE_0661 |      | hypothetical protein                                                   | 6      | 15.643229  | 12.508532 | 15.10784  | 3.8       | 2.2       | 0         | -2.84397             | 0.0116221 |
| ETAE_0670 | hpt  | hypoxanthine-guanine phosphoribosyltransferase                         | 24     | 88.484032  | 64.210466 | 97.121826 | 5.2       | 2.2       | 6.36      | -3.914996            | 0.0013724 |
| ETAE_0671 | cynT | carbonic anhydrase                                                     | 21     | 18.899502  | 24.183163 | 31.29481  | 7.8       | 6.6       | 0         | -2.152826            | 0.0099271 |
| ETAE_0697 |      | hypothetical protein                                                   | 11     | 18.899502  | 13.342435 | 20.503497 | 2.6       | 4.4       | 0         | -2.478854            | 0.0037511 |
| ETAE_0712 | recD | exonuclease V subunit alpha                                            | 35     | 224.21682  | 230.157   | 192.08539 | 48.01     | 28.61     | 59.5      | -2.24768             | 0.0016972 |
| ETAE_0746 | ompH | periplasmic chaperone                                                  | 17     | 127.161735 | 80.88851  | 99.280088 | 7.8       | 2.2       | 6.36      | -3.721214            | 0.0006499 |
| ETAE_0751 | rnhB | ribonuclease HII                                                       | 14     | 139.16906  | 150.93629 | 139.20795 | 39.81     | 11        | 50.88     | -2.077853            | 0.0027116 |
| ETAE_0769 |      | hypothetical protein                                                   | 15     | 384.86258  | 401.10694 | 332.37247 | 52.01     | 114.42    | 76.32     | -2.189963            | 0.0004505 |
| ETAE_0774 | purL | phosphoribosylformylglycinamide synthase                               | 74     | 3371.843   | 3461.5279 | 3226.6029 | 702.1     | 889.2     | 833.17    | -2.052885            | 4.836E-05 |
| ETAE_0783 | apbE | membrane-associated lipoprotein involved in thiamine biosynthesis      | 29     | 240.53912  | 245.16724 | 237.40891 | 2.6       | 4.4       | 34.98     | -4.012843            | 2.965E-05 |
| ETAE_0854 | esaL | putative type III secretion apparatus                                  | 30     | 660.6235   | 662.95222 | 673.37799 | 135.22    | 59.41     | 92.22     | -2.786588            | 1.391E-05 |
| ETAE_0856 |      | conserved hypothetical protein                                         | 15     | 390.01699  | 428.62571 | 423.01951 | 0         | 19.8      | 0         | -5.770577            | 7.7E-06   |
| ETAE_0857 | esaJ | putative type III secretion system apparatus lipoprotein               | 22     | 693.26809  | 662.95222 | 731.65109 | 13        | 24.2      | 31.8      | -4.859964            | 5.249E-06 |
| ETAE_0859 | esaH | putative type III secretion apparatus                                  | 6      | 94.49751   | 80.88851  | 76.618329 | 2.6       | 0         | 3.18      | -4.860157            | 0.0001157 |
| ETAE_0860 | esaG | putative type III secretion system needle protein                      | 7      | 180.40434  | 191.7975  | 209.35149 | 0         | 11        | 12.72     | -4.451343            | 3.715E-05 |
| ETAE_0861 | esrC | putative transcriptional regulator                                     | 19     | 842.74597  | 830.56655 | 805.03202 | 5.2       | 35.21     | 15.9      | -5.386703            | 5.671E-07 |
| ETAE_0863 | esaD | type-III secretion protein                                             | 28     | 680.38207  | 611.25028 | 625.89621 | 10.4      | 0         | 9.54      | -6.387494            | 7.65E-06  |
| ETAE_0864 | esaC | Type II secretory pathway, component PuID like protein                 | 47     | 1973.2798  | 2003.8669 | 1860.4225 | 15.6      | 46.21     | 6.36      | -6.358696            | 1.833E-06 |
| ETAE_0865 | esaB | two-component sensor/regulator                                         | 14     | 317.85526  | 361.07964 | 371.2212  | 26        | 26.4      | 22.26     | -3.761404            | 3.832E-05 |
| ETAE_0868 | eseE | type III secretion system effector protein E                           | 12     | 396.88954  | 441.13424 | 373.37946 | 7.8       | 4.4       | 15.9      | -5.287189            | 4.019E-05 |
| ETAE_0869 | eseD | type III secretion system effector protein D                           | 18     | 534.34046  | 527.86007 | 495.32131 | 148.22    | 74.81     | 15.9      | -2.689367            | 0.0003948 |
| ETAE_0870 | eseC | type III secretion system effector protein C                           | 30     | 445.85643  | 486.99886 | 498.5587  | 15.6      | 4.4       | 168.54    | -2.904744            | 0.0016989 |
| ETAE_0871 | esca | type III secretion low calcium response chaperone                      | 15     | 683.81834  | 688.80319 | 731.65109 | 13        | 46.21     | 168.54    | -3.190974            | 0.0002289 |
| ETAE_0872 | eseB | EspA family secreted protein                                           | 22     | 752.5438   | 733       | 749.99632 | 325.04    | 204.64    | 25.44     | -2.003911            | 0.0030267 |
| ETAE_0873 |      | conserved hypothetical protein                                         | 5      | 185.55875  | 199.30262 | 194.24365 | 23.4      | 0         | 25.44     | -3.489142            | 4.132E-05 |
| ETAE_0875 | esaP | putative major facilitator family transporter                          | 7      | 244.83446  | 266.84869 | 238.48804 | 7.8       | 13.2      | 3.18      | -4.79236             | 1.172E-05 |
| ETAE_0876 | esaO | type III secretion system ATPase                                       | 5      | 80.752417  | 100.90216 | 94.963563 | 0         | 0         | 0         | -6.542352            | 0.0001031 |
| ETAE_0877 | esaN | type III secretion system ATPase                                       | 24     | 530.90419  | 537.03299 | 519.0622  | 0         | 11        | 6.36      | -6.287145            | 1.154E-07 |
| ETAE_0878 | esaV | type III secretion protein, HrcV family                                | 43     | 1205.2728  | 1221.6667 | 1249.6342 | 18.2      | 24.2      | 22.26     | -5.765092            | 8.328E-08 |
| ETAE_0879 | esaM | type III secretion apparatus protein                                   | 7      | 210.47173  | 256.00796 | 228.77586 | 7.8       | 0         | 9.54      | -5.101364            | 7.575E-05 |
| ETAE_0880 | esaR | type three secretion apparatus protein R                               | 18     | 375.41283  | 355.24232 | 413.30732 | 0         | 4.4       | 0         | -7.276077            | 2.422E-05 |
| ETAE_0881 | esaS | type III secretion apparatus                                           | 6      | 222.49868  | 199.30262 | 241.72543 | 0         | 4.        |           |                      |           |

|            |                                                                               |     |           |           |           |        |        |        |           |             |
|------------|-------------------------------------------------------------------------------|-----|-----------|-----------|-----------|--------|--------|--------|-----------|-------------|
| ETA_E_1021 | hypothetical protein                                                          | 7   | 47.248755 | 62.542662 | 57.193964 | 15.6   | 19.8   | 0      | -2.146232 | 0.004279    |
| ETA_E_1025 | adk adenylate kinase                                                          | 22  | 18.899502 | 10.006826 | 16.186971 | 2.6    | 0      | 3.18   | -2.453543 | 0.0095307   |
| ETA_E_1086 | purM phosphoribosylformylglycinamide cyclo-ligase                             | 20  | 851.33665 | 842.24118 | 887.04601 | 106.61 | 107.82 | 130.38 | -2.893025 | 1.18E-06    |
| ETA_E_1095 | gcvR glycine cleavage system transcriptional repressor                        | 19  | 151.19602 | 136.75995 | 162.94884 | 44.21  | 8.8    | 34.98  | -2.31861  | 0.0007491   |
| ETA_E_1098 | purC phosphoribosylaminoimidazole-succinocarboxamide synthase                 | 17  | 485.37357 | 444.46985 | 488.84652 | 49.41  | 39.61  | 114.48 | -2.783393 | 0.0001232   |
| ETA_E_1128 | hypothetical protein                                                          | 15  | 290.36507 | 292.69966 | 268.70372 | 46.81  | 30.81  | 117.66 | -2.107994 | 0.0013998   |
| ETA_E_1131 | ptsI phosphoenolpyruvate-protein phosphotransferase                           | 43  | 47.248755 | 58.373151 | 59.352227 | 15.6   | 19.8   | 0      | -2.129601 | 0.0038179   |
| ETA_E_1167 | hypothetical protein                                                          | 16  | 4.2953413 | 9.1729238 | 5.395657  | 0      | 0      | 2.18   | -3.11323  | 0.0452115   |
| ETA_E_1169 | hypothetical protein                                                          | 122 | 56.698506 | 45.864619 | 39.927862 | 2.6    | 2.2    | 6.36   | -3.361037 | 0.0010007   |
| ETA_E_1201 | galE UDP-glucose 4-epimerase                                                  | 56  | 1262.8304 | 1299.2196 | 1101.7932 | 75.41  | 72.61  | 66.78  | -4.073463 | 4.581E-05   |
| ETA_E_1207 | neuD sialic acid synthase                                                     | 81  | 24.91289  | 25.017065 | 25.899153 | 2.6    | 0      | 3.18   | -3.166437 | 2.219E-05   |
| ETA_E_1208 | neuA acylneuraminate cytidyltransferase                                       | 118 | 42.094345 | 52.535836 | 39.927862 | 5.2    | 2.2    | 9.54   | -2.786303 | 0.0009056   |
| ETA_E_1212 | gnd 6-phosphogluconate dehydrogenase                                          | 48  | 768.8661  | 738.83732 | 789.92418 | 75.41  | 8.8    | 181.26 | -3.099195 | 0.0002058   |
| ETA_E_1407 | hemK N5-glutamine S-adenosyl-L-methionine-dependent methyltransferase         | 17  | 233.66657 | 223.48578 | 200.71844 | 96.21  | 15.4   | 0      | -2.527635 | 0.0043904   |
| ETA_E_1445 | msbB lipid A biosynthesis (KDO)2-(lauroyl)-lipid IVA acyltransferase          | 28  | 298.09669 | 341.89989 | 338.84726 | 57.21  | 17.6   | 15.9   | -3.389219 | 0.0001105   |
| ETA_E_1449 | zwf glucose-6-phosphate 1-dehydrogenase                                       | 38  | 758.55728 | 791.37315 | 786.68679 | 199.27 | 110.26 | 237.77 | -2.087982 | 0.0001108   |
| ETA_E_1450 | devB 6-phosphogluconolactonase                                                | 14  | 340.19103 | 326.88965 | 321.29334 | 67.61  | 45.23  | 66.78  | -2.455064 | 5.113E-06   |
| ETA_E_1461 | minE cell division topological specificity factor                             | 11  | 21.476707 | 40.861206 | 19.424365 | 0      | 2.2    | 0      | -4.026839 | 0.018129    |
| ETA_E_1462 | minD septum site-determining protein                                          | 24  | 420.94345 | 381.09329 | 343.16378 | 83.21  | 26.4   | 63.6   | -2.704007 | 0.0003169   |
| ETA_E_1463 | minC septum site-determining protein                                          | 25  | 749.9666  | 747.17634 | 679.85278 | 202.83 | 85.82  | 149.81 | -2.311821 | 0.0030053   |
| ETA_E_1468 | dsbB disulphide bond formation protein                                        | 12  | 188.13595 | 202.63823 | 207.19323 | 20.8   | 15.4   | 34.98  | -3.018185 | 2.801E-05   |
| ETA_E_1472 | fadR fatty acid metabolism regulator                                          | 36  | 45.530618 | 44.196815 | 41.006993 | 10.4   | 0      | 12.72  | -2.356144 | 0.0009716   |
| ETA_E_1486 | pncA nicotinamide/pyrazinamidase                                              | 11  | 487.95078 | 478.65984 | 466.18476 | 41.61  | 72.61  | 143.1  | -2.463492 | 0.0002167   |
| ETA_E_1518 | cls cardiolipin synthetase                                                    | 50  | 130.57838 | 147.60068 | 125.17924 | 23.4   | 24.2   | 25.44  | -2.417922 | 8.423E-05   |
| ETA_E_1545 | rluB ribosomal large subunit pseudouridine synthase B                         | 22  | 23.194843 | 30.020478 | 30.215679 | 7.8    | 0      | 3.18   | -2.628184 | 0.001718    |
| ETA_E_1553 | cysB transcriptional regulator                                                | 35  | 10.308819 | 15.010239 | 15.10784  | 3.2    | 0      | 3.18   | -2.663687 | 0.0081815   |
| ETA_E_1554 | cspC cold shock protein                                                       | 6   | 67.866393 | 73.38339  | 87.409643 | 10.4   | 0      | 9.54   | -3.336068 | 0.0004868   |
| ETA_E_1557 | manZ PTS system, mannose-specific IID component                               | 31  | 658.90536 | 669.62344 | 659.34928 | 130.63 | 183.85 | 176.66 | -2.010413 | 8.092E-06   |
| ETA_E_1558 | manY PTS system, mannose-specific IIC component                               | 25  | 724.19455 | 795.54266 | 663.66581 | 188.87 | 160.87 | 163.41 | -2.082697 | 0.0001419   |
| ETA_E_1559 | manX PTS system, mannose-specific IIB component                               | 34  | 877.96777 | 831.40046 | 834.16857 | 179.88 | 244.48 | 199.27 | -2.022851 | 1.249E-05   |
| ETA_E_1614 | regulatory prophage protein cl                                                | 20  | 115.97422 | 107.57338 | 111.15053 | 15.6   | 46.21  | 12.72  | -2.122908 | 0.001394    |
| ETA_E_1615 | cro putative phage transcriptional regulatory protein                         | 11  | 85.906827 | 94.230944 | 124.10011 | 18.2   | 11     | 25.44  | -2.414214 | 0.0020585   |
| ETA_E_1632 | hypothetical protein                                                          | 3   | 60.993847 | 59.207053 | 46.40265  | 2.6    | 0      | 3.18   | -2.181056 | 0.0169463   |
| ETA_E_1655 | prc carboxy-terminal protease                                                 | 61  | 174.39086 | 168.44824 | 176.97755 | 7.8    | 11     | 9.54   | -4.060228 | 4.347E-07   |
| ETA_E_1675 | hypothetical protein                                                          | 5   | 32.644594 | 28.352673 | 36.690467 | 5.2    | 0      | 12.72  | -2.266933 | 0.0038064   |
| ETA_E_1695 | rsxE SoxR-reducing system protein                                             | 17  | 91.920305 | 84.224118 | 90.647037 | 33.8   | 4.4    | 6.36   | -2.540424 | 0.0016318   |
| ETA_E_1696 | rnfG electron transport complex protein                                       | 16  | 34.362731 | 33.356086 | 14.028708 | 5.2    | 0      | 0      | -3.369475 | 0.0020289   |
| ETA_E_1697 | rnfD electron transport complex protein                                       | 46  | 46.389686 | 40.861206 | 46.40265  | 7.8    | 2.2    | 0      | -3.393399 | 0.0001554   |
| ETA_E_1698 | rnfE electron transport complex protein                                       | 23  | 157.20949 | 151.77019 | 142.44534 | 44.21  | 33.01  | 15.9   | -2.241134 | 0.0002112   |
| ETA_E_1700 | Na(+)-translocating NADH-quinone reductase subunit E                          | 20  | 209.28321 | 19.17975  | 21.582628 | 0      | 0      | 0      | -4.604283 | 0.0015192   |
| ETA_E_1705 | add adenosine deaminase                                                       | 23  | 353.07706 | 321.88623 | 311.88897 | 28.6   | 11     | 54.06  | -3.356193 | 7.179E-05   |
| ETA_E_1712 | hypothetical protein                                                          | 9   | 55.839437 | 41.695108 | 61.51049  | 5.2    | 18.61  | 6.36   | -2.398249 | 0.0146758   |
| ETA_E_1786 | predicted permease                                                            | 34  | 693.26809 | 696.3083  | 656.11189 | 202.83 | 72.61  | 128.46 | -2.340516 | 0.00217     |
| ETA_E_1792 | aroH 3-deoxy-7-phosphoheptulonate synthase                                    | 25  | 81.611485 | 80.88851  | 90.647037 | 0      | 0      | 0      | -6.415866 | 1.139E-05   |
| ETA_E_1822 | pfkfb 6-phosphofructokinase                                                   | 26  | 1254.2397 | 1239.1786 | 1238.8428 | 310.12 | 201.66 | 298.53 | -2.199332 | 6.949E-06   |
| ETA_E_1839 | hypothetical protein                                                          | 4   | 125.42397 | 112.57679 | 108.99227 | 10.4   | 24.2   | 12.72  | -2.798122 | 0.0001087   |
| ETA_E_1840 | pabB anthranilate/para-aminobenzoate synthases component I                    | 31  | 584.16642 | 615.4198  | 575.17703 | 18.2   | 13.2   | 12.72  | -5.23758  | 1.245E-06   |
| ETA_E_1851 | hypothetical protein                                                          | 14  | 21.476707 | 18.345848 | 7.5539198 | 0      | 0      | 0      | -4.069716 | 0.0200376   |
| ETA_E_1883 | potC spermidine/putrescine ABC transporter membrane protein                   | 22  | 159.7987  | 203.47213 | 187.76886 | 44.21  | 19.8   | 56.32  | -2.195128 | 0.0027405   |
| ETA_E_1910 | hypothetical protein                                                          | 35  | 972.46528 | 1040.7099 | 966.90173 | 231.43 | 160.63 | 318    | -2.064706 | 0.0001232   |
| ETA_E_1967 | HpcH/HpaI aldolase family protein                                             | 9   | 121.98769 | 117.5802  | 90.647037 | 13     | 6.6    | 38.16  | -2.455259 | 0.002714    |
| ETA_E_1981 | hypothetical protein                                                          | 3   | 16.322297 | 19.17975  | 14.028708 | 5.2    | 2.6    | 0      | -2.666779 | 0.0073317   |
| ETA_E_1982 | leuD 3-isopropylmalate dehydratase small subunit                              | 19  | 469.05127 | 483.66325 | 444.60213 | 86.27  | 62.65  | 52.45  | -2.776498 | 1.246E-05   |
| ETA_E_2044 | uvrC excinuclease ABC subunit C                                               | 51  | 923.49839 | 969.82821 | 1095.3184 | 289.32 | 185.54 | 252.25 | -2.034753 | 0.0002255   |
| ETA_E_2071 | transcriptional regulator, DeoR family                                        | 13  | 450.15177 | 456.14448 | 473.73868 | 60.05  | 62.63  | 54.25  | -2.94233  | 7.32E-07    |
| ETA_E_2079 | DeoA-family membrane protein                                                  | 12  | 232.8075  | 240.16382 | 254.67501 | 75.41  | 8.8    | 79.5   | -2.131833 | 0.0013896   |
| ETA_E_2099 | fabG 3-ketoacyl-(acyl-carrier-protein) reductase                              | 28  | 12.886024 | 10.006826 | 21.582628 | 2.2    | 2.2    | 3.18   | -2.55274  | 0.034601    |
| ETA_E_2114 | fumA hydro-lyase, Fe-S type, tartrate/fumarate subfamily, beta subunit        | 59  | 927.79373 | 885.6041  | 911.86603 | 101.41 | 26.4   | 238.5  | -2.885079 | 0.0002415   |
| ETA_E_2176 | cmk cytidylate kinase                                                         | 19  | 24.053912 | 27.518771 | 25.899153 | 10.4   | 0      | 6.36   | -2.025901 | 0.0031556   |
| ETA_E_2177 | aroA 3-phosphoshikimate 1-carboxyvinyltransferase                             | 35  | 572.99854 | 569.55518 | 467.26389 | 2.6    | 2.2    | 3.18   | -7.198561 | 0.0001039   |
| ETA_E_2178 | serC phosphoserine aminotransferase                                           | 36  | 11.167887 | 9.1729238 | 5.395657  | 2.2    | 0      | 0      | -3.548239 | 0.047556    |
| ETA_E_2202 | trxB thioredoxin reductase (NADPH)                                            | 29  | 329.02315 | 317.71672 | 311.88897 | 26     | 8.8    | 57.24  | -3.338843 | 4.337E-05   |
| ETA_E_2241 | grxA glutaredoxin 1                                                           | 11  | 110.81981 | 91.729238 | 76.618329 | 26     | 19.8   | 12.72  | -2.197424 | 0.0022761   |
| ETA_E_2260 | undecaprenyl-diphosphatase                                                    | 17  | 250.84793 | 281.85893 | 283.81156 | 18.2   | 0      | 69.96  | -3.168304 | 0.0004969   |
| ETA_E_2281 | hisF imidazole glycerol phosphate synthase subunit                            | 16  | 413.21184 | 437.79863 | 405.7534  | 75.22  | 96.82  | 120.84 | -2.101332 | 3.442E-05   |
| ETA_E_2298 | NLP/P60 protein                                                               | 29  | 852.19572 | 833.90216 | 836.32683 | 91.01  | 123.22 | 111.3  | -2.942429 | 3.066E-07   |
| ETA_E_2306 | hypothetical protein                                                          | 12  | 19.75857  | 23.349261 | 22.661759 | 5.8    | 6.6    | 0      | -2.407081 | 0.0030077   |
| ETA_E_2324 | putative transcriptional regulator                                            | 20  | 871.09522 | 778.03072 | 883.80861 | 137.82 | 11     | 152.64 | -3.058193 | 0.0001852   |
| ETA_E_2326 | transcriptional regulator, AraC family                                        | 13  | 271.46557 | 277.68942 | 308.63158 | 93.61  | 26.4   | 50.88  | -2.307481 | 0.0005486   |
| ETA_E_2327 | rhsE ATP-dependent RNA helicase                                               | 36  | 1499.0741 | 1433.4778 | 1411.5039 | 281.98 | 491.87 | 224.32 | -2.118352 | 0.0001989   |
| ETA_E_2334 | rcbB two-component system, NarL family, captular synthesis response regulator | 14  | 140.02813 | 134.25825 | 105.75488 | 20.8   | 35.21  | 0      | -2.698468 | 0.0018366   |
| ETA_E_2346 | moaC molybdenum cofactor biosynthesis protein C                               | 10  | 615.95195 | 585.39932 | 512.58741 | 86.46  | 102.06 | 97.85  | -2.568851 | 0.0001052   |
| ETA_E_2347 | moaA molybdenum cofactor biosynthesis protein A                               | 22  | 382.28538 | 434.46303 | 382.01251 | 79.65  | 43.48  | 47.65  | -2.789816 | 8.022E-05   |
| ETA_E_2359 | menF isochorismate synthase                                                   | 29  | 652.89188 | 676.29465 | 693.88149 | 190.28 | 155.25 | 120.11 | -2.112131 | 2.476E-05   |
| ETA_E_2373 | nuoM NADH:ubiquinone oxidoreductase subunit 2 (chain N)                       | 38  | 109.10167 | 102.56997 | 85.25138  | 2.6    | 4.4    | 3.18   | -4.50817  | 0.0001796   |
| ETA_E_2374 | nuoM NADH:ubiquinone oxidoreductase subunit 4 (chain M)                       | 45  | 170.95459 | 180.12287 | 183.45234 | 7.8    | 0      | 3.18   | -5.264908 | 2.348E-06   |
| ETA_E_2375 | nuoL NADH:ubiquinone oxidoreductase subunit 5 (chain L)/multisubunit Na+/H+   | 56  | 267.17023 | 260.17747 | 295.862   | 5.2    | 4.4    | 9.54   | -5.221467 | 1.67E-05    |
| ETA_E_2376 | nuoK NADH:ubiquinone oxidoreductase subunit 11 or 4L (chain K)                | 7   | 36.939936 | 50.03413  | 46.40265  | 0      | 0      | 3.18   | -4.463847 | 0.0004274   |
| ETA_E_2377 | nuoJ NADH:ubiquinone oxidoreductase subunit 6 (chain J)                       | 12  | 90.202168 | 95.064846 | 83.093117 | 13     | 6.6    | 19.08  | -2.702782 | 0.0001067   |
| ETA_E_2378 | nuoI formate hydrogenlyase subunit 6/NADH:ubiquinone oxidoreductase 23 kD     | 18  | 42.094345 | 50.868032 | 36.690467 | 0      | 0      | 0      | -5.466549 | 0.0004718   |
| ETA_E_2380 | nuoG NADH dehydrogenase/NADH:ubiquinone oxidoreductase 75 kD subunit (c       | 68  | 349.64079 | 371.08646 | 397.12035 | 15.6   | 2.2    | 12.72  | -5.063424 | 1.446E-05   |
| ETA_E_2381 | nuoF NADH:ubiquinone oxidoreductase, NADH-binding (51 kD) subunit             | 29  | 82.779373 | 87.559727 | 87.409643 | 5.2    | 0      | 0      | -5.045187 | 3.812E-06   |
| ETA_E_2382 | nuoE NADH:ubiquinone oxidoreductase 24 kD subunit                             | 11  | 30.926458 | 26.684869 | 39.927862 | 0      | 0      | 0      | -5.066652 | 0.0011363   |
| ETA_E_2383 | nuoD NADH:ubiquinone oxidoreductase 49 kD subunit 7                           | 49  | 288.64694 | 242.66553 | 270.86198 | 18.2   | 2.2    | 6.36   | -4.757855 | 5.386E-05   |
| ETA_E_2384 | nuoB NADH:ubiquinone oxidoreductase 20 kD subunit and related Fe-S oxidore    | 27  | 185.55875 | 161.77702 | 215.82628 | 5.2    | 0      | 0      | -6.109447 | 0.0002933   |
| ETA_E_2385 | nuoA NADH:ubiquinone oxidoreductase subunit 3 (chain A)                       | 15  | 32.644594 | 46.698521 | 37.769599 | 2.6    | 0      | 0      | -4.422818 | 0.0008103   |
| ETA_E_2391 | aminotransferase class I and II                                               | 31  | 1456.1207 | 1477.6746 | 1533.4457 | 228.83 | 330.06 | 324.36 | -2.334567 | 7.568E-06   |
| ETA_E_2398 | pta phosphotransacylase                                                       | 39  | 16.322297 | 18.345848 | 15.10784  | 5.2    | 0      | 4.36   | -2.380367 | 0.0042173   |
| ETA_E_2410 | cvpA colicin V production protein                                             | 19  | 274.04278 | 238.49602 | 212.58888 | 46.81  | 6.6    | 44.52  | -2.850836 | 0.0006934   |
| ETA_E_2428 | evpP type VI secretion system protein EvpP                                    | 29  | 377.99004 | 371.92036 | 441.36474 | 143.02 | 61.61  | 15.9   | -2.417595 | 0.0017144   |
| ETA_E_2429 | evpA type VI secretion system protein EvpA                                    | 12  | 267.17023 | 216.81456 | 247.12109 | 0      | 0      | 0      | -7.934882 | 7.623E-05</ |

|           |                                                                                |    |           |           |           |        |        |        |           |           |
|-----------|--------------------------------------------------------------------------------|----|-----------|-----------|-----------|--------|--------|--------|-----------|-----------|
| ETAE_2441 | evpM type VI secretion system protein EvpM                                     | 38 | 1110.7753 | 1144.9477 | 1225.8933 | 10.4   | 39.61  | 25.44  | -5.473083 | 5.483E-06 |
| ETAE_2442 | evpN type VI secretion system protein EvpN                                     | 20 | 970.74714 | 999.84869 | 1038.1244 | 20.8   | 50.61  | 34.98  | -4.783035 | 1.412E-06 |
| ETAE_2443 | evpO type VI secretion system protein EvpO                                     | 86 | 2226.705  | 2208.1729 | 2314.7368 | 41.61  | 50.61  | 47.7   | -5.562167 | 3.007E-07 |
| ETAE_2445 | aroC chorismate synthase                                                       | 19 | 374.55377 | 376.08987 | 336.689   | 88.41  | 35.21  | 115.36 | -2.185832 | 0.00263   |
| ETAE_2448 | sixA phosphohistidine phosphatase                                              | 10 | 53.262233 | 47.532423 | 53.95657  | 7.8    | 0      | 12.72  | -2.745691 | 0.0004502 |
| ETAE_2488 | hypothetical protein                                                           | 9  | 25.772048 | 19.17975  | 32.373942 | 5.2    | 2.2    | 9.54   | -2.010197 | 0.0009396 |
| ETAE_2524 | hypothetical protein                                                           | 12 | 21.476707 | 25.017065 | 26.978285 | 7.8    | 4.4    | 3.18   | -2.056796 | 0.0007999 |
| ETAE_2547 | uvrB excinuclease ABC subunit B                                                | 43 | 1812.634  | 1826.2457 | 1890.6382 | 455.24 | 340.04 | 281.56 | -2.357119 | 1.24E-05  |
| ETAE_2575 | tolR colicin uptake protein                                                    | 13 | 3.7181365 | 1.6678043 | 4.3165256 | 0      | 0      | 0      | -2.01     | 0.0425803 |
| ETAE_2582 | sucC succinyl-CoA synthetase subunit beta                                      | 27 | 422.66159 | 406.94425 | 374.45859 | 46.81  | 57.21  | 38.16  | -3.055588 | 2.028E-05 |
| ETAE_2583 | sucB 2-oxoglutarate dehydrogenase, E2 subunit, dihydroliipoamide succinyltrans | 28 | 173.53179 | 162.61092 | 185.6106  | 13     | 6.6    | 6.36   | -4.179506 | 1.897E-05 |
| ETAE_2584 | sucA component of the 2-oxoglutarate dehydrogenase complex, thiamin-binding    | 59 | 824.70554 | 778.03072 | 796.39897 | 0      | 8.8    | 9.54   | -6.814613 | 5.663E-07 |
| ETAE_2585 | sdhB succinate dehydrogenase iron-sulfur subunit                               | 20 | 297.23762 | 288.53015 | 285.96982 | 78.81  | 63.62  | 64.94  | -2.055921 | 3.082E-06 |
| ETAE_2586 | sdhA succinate dehydrogenase catalytic subunit                                 | 33 | 977.61969 | 1006.5199 | 1015.4626 | 218.43 | 288.25 | 157.58 | -2.169892 | 3.887E-05 |
| ETAE_2587 | sdhD succinate dehydrogenase cytochrome b556 small membrane subunit            | 15 | 902.88075 | 927.2992  | 904.31211 | 179.42 | 74.81  | 168.54 | -2.684709 | 2.281E-05 |
| ETAE_2588 | sdhC succinate dehydrogenase cytochrome b556 large membrane subunit            | 11 | 193.29036 | 180.12287 | 173.74015 | 57.61  | 33.01  | 34.98  | -2.123109 | 0.0004052 |
| ETAE_2589 | glTA type II citrate synthase                                                  | 41 | 1353.0325 | 1366.7656 | 1427.6908 | 176.82 | 244.24 | 337.08 | -2.447048 | 2.617E-05 |
| ETAE_2593 | edwR AHL-dependent transcriptional regulator                                   | 32 | 275.76091 | 287.69625 | 247.12109 | 67.61  | 35.21  | 38.16  | -2.498413 | 0.0001484 |
| ETAE_2617 | nagB glucosamine-6-phosphate deaminase                                         | 33 | 446.7155  | 467.81911 | 468.34303 | 140.42 | 68.21  | 114.48 | -2.087369 | 9.26E-05  |
| ETAE_2619 | nagC putative N-acetylglucosamine regulatory protein                           | 28 | 168.37738 | 185.96018 | 173.74015 | 41.61  | 8.8    | 12.72  | -3.005546 | 0.0001802 |
| ETAE_2649 | lipB lipote-protein ligase B                                                   | 23 | 329.88222 | 331.05916 | 240.6463  | 101.41 | 28.61  | 87.66  | -2.050259 | 0.0057991 |
| ETAE_2700 | purE phosphoribosylaminoimidazole carboxylase catalytic subunit                | 8  | 164.94111 | 156.77361 | 149.99926 | 7.8    | 2.2    | 22.26  | -3.750954 | 3.788E-05 |
| ETAE_2701 | purK phosphoribosylaminoimidazole carboxylase                                  | 22 | 752.5438  | 804.71559 | 735.96761 | 187.23 | 170.65 | 181.26 | -2.088647 | 0.0001005 |
| ETAE_2724 | lepA GTP-binding protein                                                       | 48 | 79.034281 | 70.881684 | 85.25138  | 26     | 6.6    | 6.36   | -2.504889 | 0.0010659 |
| ETAE_2731 | srnB ATP-dependent RNA helicase                                                | 31 | 399.46674 | 342.73379 | 362.58815 | 46.81  | 17.6   | 47.7   | -3.266598 | 6.846E-05 |
| ETAE_2738 | smpA SmpA/OmlA domain protein                                                  | 14 | 79.893349 | 82.556314 | 66.906146 | 10.4   | 6.6    | 19.08  | -2.571833 | 0.00045   |
| ETAE_2739 | hypothetical protein                                                           | 7  | 18.899502 | 16.678043 | 39.927862 | 7.8    | 0      | 0      | -2.861761 | 0.045251  |
| ETAE_2786 | guaA GMP synthase, large subunit                                               | 31 | 108.2426  | 105.07167 | 135.97056 | 15.6   | 2.2    | 0      | -4.082087 | 0.0005442 |
| ETAE_2787 | guaB inositol-5-monophosphate dehydrogenase                                    | 35 | 621.96543 | 642.10466 | 614.02576 | 0      | 0      | 0      | -9.292395 | 1.903E-07 |
| ETAE_2812 | hscB co-chaperone Hsc20                                                        | 11 | 20.617638 | 15.010239 | 20.503497 | 3.8    | 0      | 6.36   | -2.465907 | 0.0098739 |
| ETAE_2855 | gshA glutamate--cysteine ligase                                                | 47 | 134.01465 | 123.41752 | 133.81229 | 2.6    | 8.8    | 25.44  | -3.306801 | 0.0001034 |
| ETAE_2876 | ETAE_2876 stationary phase survival protein                                    | 14 | 315.27805 | 311.04551 | 305.39418 | 57.42  | 50.61  | 85.86  | -2.264655 | 0.0005739 |
| ETAE_2877 | truD tRNA pseudouridine synthase D                                             | 18 | 500.8368  | 474.49033 | 433.81082 | 111.82 | 63.81  | 124.02 | -2.222159 | 0.0001596 |
| ETAE_2879 | ispD 2-C-methyl-D-erythritol 4-phosphate cytidylyltransferase                  | 13 | 18.040434 | 32.522184 | 49.640044 | 0      | 0      | 0      | -5.104374 | 0.0216312 |
| ETAE_2947 | Z-ring-associated protein                                                      | 13 | 348.78172 | 346.9033  | 339.92639 | 110.82 | 63.81  | 50.88  | -2.199219 | 0.0012334 |
| ETAE_2964 | metK S-adenosylmethionine synthetase                                           | 10 | 14.604161 | 12.508532 | 8.6330512 | 4.8    | 0      | 0      | -2.896665 | 0.0410327 |
| ETAE_3036 | hypothetical protein                                                           | 12 | 28.349253 | 17.511945 | 14.028708 | 7.8    | 0      | 3.18   | -2.169464 | 0.0286353 |
| ETAE_3148 | panF sodium/panthothenate symporter                                            | 37 | 285.21067 | 335.22867 | 328.05594 | 65.01  | 59.41  | 79.5   | -2.201123 | 0.00012   |
| ETAE_3248 | trpD anthranilate synthase component II                                        | 17 | 702.71784 | 636.26735 | 623.73795 | 31.2   | 15.4   | 85.86  | -3.859121 | 4.742E-05 |
| ETAE_3278 | envZ osmolarity sensor protein                                                 | 44 | 786.90653 | 751.34585 | 841.72249 | 109.21 | 79.21  | 159    | -2.765607 | 4.248E-05 |
| ETAE_3312 | glpD glycerol-3-phosphate dehydrogenase                                        | 41 | 42.094345 | 65.044369 | 31.29481  | 7.8    | 2.2    | 0      | -3.443541 | 0.0138098 |
| ETAE_3327 | cell division protein                                                          | 26 | 2007.6425 | 2027.2162 | 1773.0129 | 518.88 | 255.25 | 575.59 | -1.999998 | 0.0004977 |
| ETAE_3328 | ftsE cell division protein                                                     | 17 | 1525.7052 | 1475.1729 | 1310.0655 | 405.66 | 239.84 | 386.55 | -2.062491 | 0.0004073 |
| ETAE_3367 | gor glutathione-disulfide reductase                                            | 42 | 809.24231 | 883.93629 | 793.16158 | 260.04 | 116.62 | 146.28 | -2.242793 | 0.0002275 |
| ETAE_3400 | proC pyrroline-5-carboxylate reductase                                         | 16 | 210.47173 | 203.47213 | 199.63931 | 5.2    | 2.2    | 9.54   | -4.950558 | 8.151E-07 |
| ETAE_3438 | menA 1,4-dihydroxy-2-naphthoate octaprenyltransferase                          | 33 | 1108.1981 | 1129.1035 | 1148.1958 | 313.91 | 231.28 | 226.47 | -2.129011 | 9.101E-06 |
| ETAE_3446 | frp ferredoxin-NADP reductase                                                  | 23 | 394.31234 | 361.07964 | 353.9551  | 41.61  | 22     | 66.78  | -3.059885 | 5.398E-05 |
| ETAE_3450 | ptk 6-phosphofruktokinase                                                      | 35 | 240.53912 | 276.02162 | 279.49503 | 65.01  | 30.81  | 69.96  | -2.243152 | 0.0002762 |
| ETAE_3461 | gpm phosphoglycerate mutase                                                    | 45 | 173.53179 | 150.93629 | 152.15753 | 62.44  | 0      | 22.26  | -2.451754 | 0.0026717 |
| ETAE_3462 | membrane-bound metalloproteinase                                               | 35 | 1879.6414 | 1886.2867 | 2006.1053 | 309.44 | 72.61  | 314.82 | -3.04467  | 4.677E-05 |
| ETAE_3476 | transcriptional regulator, LysR family                                         | 29 | 1140.8427 | 1159.9579 | 1083.4479 | 72.81  | 2.2    | 216.24 | -3.525    | 0.0001043 |
| ETAE_3481 | argB acetylglutamate kinase                                                    | 19 | 1043.7679 | 1050.7167 | 1016.5418 | 117.47 | 359.38 | 244.47 | -2.104082 | 0.0003523 |
| ETAE_3492 | yihK GTP-binding protein                                                       | 64 | 111.67887 | 116.7463  | 98.200957 | 0      | 2.2    | 3.18   | -5.297737 | 4.449E-05 |
| ETAE_3493 | glN glutamine synthetase                                                       | 44 | 944.9751  | 953.98407 | 1026.254  | 252.23 | 55.01  | 155.82 | -2.651433 | 0.000194  |
| ETAE_3531 | atpA F-type H+-transporting ATPase alpha chain                                 | 50 | 5.1544096 | 8.3390216 | 5.395657  | 0      | 0      | 1.18   | -4.000694 | 0.0237262 |
| ETAE_3540 | pstA ABC-type phosphate transport system, permease component                   | 26 | 24.053912 | 19.17975  | 21.582628 | 5.2    | 0      | 0      | -3.047936 | 0.0008805 |
| ETAE_3554 | lpxH UDP-2,3-diacylglucosamine pyrophosphatase                                 | 24 | 18.899502 | 17.511945 | 22.661759 | 0      | 2.2    | 0      | -3.577387 | 0.0003716 |

**Table S11 Regions for genes of interests after in vivo and in vitro screening**

| ID        | loc-s   | loc-e   | gene | Annotation-nr          | DMEM/Input   | J774A.1/Input | Turbot/Input | category |
|-----------|---------|---------|------|------------------------|--------------|---------------|--------------|----------|
| ETAE_0073 | 65362   | 66456   | wabH | putative glycosy       | -2.131967136 | 0.753208244   | 1.042644337  | region1  |
| ETAE_0074 | 66460   | 67587   | waaG | lipopolysacchari       | -1.12998707  | 1.177650735   | -3.191256379 | region1  |
| ETAE_0075 | 67584   | 68660   | waaQ | heptosyl III transfi   | -2.856865972 | 0.586506554   | -2.036103053 | region1  |
| ETAE_0076 | 68793   | 69764   | walW | lipopolysacchari       | -3.033742991 | -0.904675783  | -2.703135853 | region1  |
| ETAE_0077 | 69850   | 71061   |      | putative glycosy       | -0.012558773 | -0.235049314  | 0.780377638  | region1  |
| ETAE_0078 | 71268   | 72374   | walR | putative glycosy       | -2.503221036 | 0.126252918   | 1.592898884  | region1  |
| ETAE_0079 | 72378   | 73535   | wabK | putative glycosy       | -3.104561798 | 0.255657819   | 0            | region1  |
| ETAE_0080 | 73537   | 74670   | walL | lipid A core - O-c     | 0.11381022   | -0.867720963  | 0.1398864    | region1  |
| ETAE_0081 | 74660   | 75625   | waaC | ADP-heptose:LP $\zeta$ | 1.097024454  | 4.07980996    | -1.315193724 | region1  |
| ETAE_0082 | 75613   | 76674   | waaF | ADP-heptose:LP $\zeta$ | 0.952243775  | 0.383626693   | -1.191401195 | region1  |
| ETAE_0083 | 76698   | 77627   | rfaD | ADP-L-glycero-D        | -1.659230386 | 0.639753601   | -1.355002573 | region1  |
| ETAE_0860 | 942694  | 942915  | esaG | putative type III s    | 0.335681578  | -2.735750711  | -4.451342723 | region2  |
| ETAE_0861 | 942934  | 943626  | esrC | putative transcrip     | 0.684854525  | -3.500291293  | -5.386702891 | region2  |
| ETAE_0862 | 943711  | 943935  |      | hypothetical pro       | 0.40428455   | 0.289725369   | 0.764671248  | region2  |
| ETAE_0863 | 943946  | 945136  | esaD | type-III secretion     | 0.030868954  | 0.183084454   | -6.387494218 | region2  |
| ETAE_0864 | 945144  | 946628  | esaC | Type II secretory      | 0.081003617  | -0.488940103  | -6.358695937 | region2  |
| ETAE_0865 | 946625  | 947104  | esaB | two-component          | -0.074744379 | -0.89731476   | -3.761403766 | region2  |
| ETAE_0866 | 947143  | 948162  | eseG | two-component          | -0.132075936 | 0.233248623   | -1.015808013 | region2  |
| ETAE_0867 | 948050  | 948541  | escB | type III secretion     | 0.210345642  | 0.08486143    | -1.413532895 | region2  |
| ETAE_0868 | 948697  | 949080  | eseE | type III secretion     | 0.102403366  | -0.139261225  | -5.287189162 | region2  |
| ETAE_0869 | 949091  | 949672  | eseD | type III secretion     | 0.121914919  | 0.030338547   | -2.689366966 | region2  |
| ETAE_0870 | 949688  | 951208  | eseC | type III secretion     | 0.057012458  | -0.015564898  | -2.90474386  | region2  |
| ETAE_0871 | 951121  | 951588  | escA | type III secretion     | 0.000339695  | 0.099214783   | -3.190974411 | region2  |
| ETAE_0872 | 951599  | 952195  | eseB | EspA family secre      | 0.303516655  | 0.083900032   | -2.003910926 | region2  |
| ETAE_0873 | 952220  | 952567  |      | conserved hypo         | -0.04188396  | -0.448116749  | -6.38914182  | region2  |
| ETAE_0874 | 952871  | 953785  | esaQ | translocation prc      | 0.125934069  | -0.383922713  | -5.315107022 | region2  |
| ETAE_0875 | 953763  | 954236  | esaP | putative major fc      | -0.073484791 | 0.072366716   | -4.792360448 | region2  |
| ETAE_0876 | 954233  | 954601  | esaO | type III secretion     | 0.007363707  | -1.358719487  | -6.542351654 | region2  |
| ETAE_0877 | 954595  | 955911  | esaN | type III secretion     | -0.061162966 | 1.099063679   | -6.287144834 | region2  |
| ETAE_0878 | 955898  | 957955  | esaV | type III secretion     | -0.100326418 | -0.140884208  | -5.765091606 | region2  |
| ETAE_0879 | 957939  | 958319  | esaM | type III secretion     | -0.016531647 | 0.653106873   | -5.101363541 | region2  |
| ETAE_0880 | 958499  | 959146  | esaR | type three secre       | -0.160763926 | 1.154581364   | -7.27607721  | region2  |
| ETAE_0881 | 959165  | 959434  | esaS | type III secretion     | -0.039179404 | -2.101048748  | -6.492993654 | region2  |
| ETAE_0882 | 959434  | 960216  | esaT | type III secretion     | 0.087116512  | -2.967488623  | -7.111083855 | region2  |
| ETAE_0883 | 960213  | 961271  | esaU | type III secretion     | 0.050794596  | -3.749764336  | -5.299346927 | region2  |
| ETAE_0884 | 961264  | 961914  |      | putative transgly      | 0.172018165  | -3.553164088  | -3.487438937 | region2  |
| ETAE_0885 | 961860  | 964661  | esrA | two-component          | 0.344473177  | -3.261240893  | -6.427831621 | region2  |
| ETAE_0886 | 964658  | 965302  | esrB | two-component          | 0.099314503  | -3.141890979  | -1.667898125 | region2  |
| ETAE_2373 | 2498661 | 2500118 | nuoN | NADH:ubiquinon         | 0.029350574  | -1.694218146  | -4.508169964 | region3  |
| ETAE_2374 | 2500125 | 2501648 | nuoM | NADH:ubiquinon         | -0.061208448 | -2.495901617  | -5.264908444 | region3  |
| ETAE_2375 | 2501726 | 2503570 | nuoL | NADH:ubiquinon         | -0.050097379 | -1.71155172   | -5.221466542 | region3  |
| ETAE_2376 | 2503567 | 2503869 | nuoK | NADH:ubiquinon         | -0.350862071 | -1.924347325  | -4.463846693 | region3  |
| ETAE_2377 | 2503866 | 2504438 | nuoJ | NADH:ubiquinon         | -0.430819243 | -3.582410392  | -2.702781594 | region3  |
| ETAE_2378 | 2504449 | 2504991 | nuoI | formate hydroge        | 0.093756537  | -2.221482716  | -5.4665493   | region3  |
| ETAE_2379 | 2505009 | 2505986 | nuoH | NADH:ubiquinon         | 0.171767748  | -0.594618037  | -3.324725804 | region3  |
| ETAE_2380 | 2505983 | 2508718 | nuoG | NADH dehydrog          | 0.044950791  | -1.717393614  | -5.063424172 | region3  |
| ETAE_2381 | 2508779 | 2510125 | nuoF | NADH:ubiquinon         | 0.114994175  | -3.648998663  | -5.04518692  | region3  |
| ETAE_2382 | 2510122 | 2510622 | nuoE | NADH:ubiquinon         | 0.399321671  | -1.204341271  | -5.066651638 | region3  |
| ETAE_2383 | 2510625 | 2512421 | nuoD | NADH:ubiquinon         | 0.110122605  | -2.274364101  | -4.757854957 | region3  |
| ETAE_2384 | 2512521 | 2513195 | nuoB | NADH:ubiquinon         | -0.117939029 | -1.810318535  | -6.109447314 | region3  |
| ETAE_2385 | 2513259 | 2513618 | nuoA | NADH:ubiquinon         | 0.445872139  | -2.500223919  | -4.422818233 | region3  |
| ETAE_2428 | 2554573 | 2555136 | evpP | type VI secretion      | -0.011017199 | -0.192785759  | -2.417594876 | region4  |
| ETAE_2429 | 2555386 | 2555901 | evpA | type VI secretion      | 0.194115069  | -0.699248533  | -7.934881853 | region4  |
| ETAE_2430 | 2555898 | 2557385 | evpB | type VI secretion      | -0.052361621 | -0.402694053  | -3.065273183 | region4  |
| ETAE_2431 | 2557455 | 2557946 | evpC | type VI secretion      | -0.044305356 | -0.429432845  | -5.276353601 | region4  |
| ETAE_2432 | 2558043 | 2559248 | evpD | type VI secretion      | 0.039331342  | -0.079935946  | -4.951615624 | region4  |
| ETAE_2433 | 2559257 | 2559733 | evpE | type VI secretion      | 0.001068584  | -0.160079486  | -5.620110996 | region4  |
| ETAE_2434 | 2559737 | 2561578 | evpF | type VI secretion      | -0.092801513 | -0.021723099  | -6.092925209 | region4  |
| ETAE_2435 | 2561575 | 2562600 | evpG | type VI secretion      | -0.055207938 | -0.417009205  | -4.85852982  | region4  |
| ETAE_2436 | 2562719 | 2565331 | evpH | type VI secretion      | 0.0317927    | -0.165080774  | -6.114718663 | region4  |
| ETAE_2437 | 2565331 | 2567316 | evpI | type VI secretion      | 0.051936205  | -0.262586565  | -5.739158632 | region4  |
| ETAE_2438 | 2567411 | 2567713 | evpJ | type VI secretion      | 0.123923695  | 0.138112081   | -6.904822177 | region4  |
| ETAE_2439 | 2567727 | 2568794 | evpK | type VI secretion      | 0.027725446  | -0.232445393  | -5.83709582  | region4  |
| ETAE_2440 | 2568715 | 2569422 | evpL | type VI secretion      | 0.299428151  | 0.058126482   | -5.887241041 | region4  |
| ETAE_2441 | 2569522 | 2570910 | evpM | type VI secretion      | 0.211728325  | -0.087730055  | -5.473082509 | region4  |
| ETAE_2442 | 2570907 | 2571557 | evpN | type VI secretion      | -0.531149416 | -0.106168872  | -4.783034998 | region4  |
| ETAE_2443 | 2571545 | 2575336 | evpO | type VI secretion      | 0.030628451  | -0.184312318  | -5.56216652  | region4  |

**Table 12 Intracellular growth deficient mutants**

| Strain with mutation in | Annotation                                            | Gene name      | Intracellular growth | Autoaggregation |
|-------------------------|-------------------------------------------------------|----------------|----------------------|-----------------|
| WT                      | /                                                     |                | +                    | +               |
| ETAE_0854               | Putative type III secretion apparatus                 | esaL ETAE_0854 | -                    | -               |
| ETAE_0856               | Uncharacterized protein                               | ETAE_0856      | -                    | -               |
| ETAE_0857               | Lipoprotein                                           | esaJ ETAE_0857 | -                    | -               |
| ETAE_0860               | Putative type III secretion system needle protein     | esaG ETAE_0860 | -                    | -               |
| ETAE_0861               | Putative transcriptional regulator EsrC               | esrC ETAE_0861 | -                    | -               |
| ETAE_0863               | Type-III secretion protein                            | esaD ETAE_0863 | -                    | -               |
| ETAE_0864               | Type II secretory pathway, component PuD like protein | esaC ETAE_0864 | -                    | -               |
| ETAE_0865               | Uncharacterized protein                               | esaB ETAE_0865 | -                    | -               |
| ETAE_0872               | EspA family secreted protein                          | eseB ETAE_0872 | -                    | -               |
| ETAE_0875               | Putative major facilitator family transporter         | esaP ETAE_0875 | -                    | -               |
| ETAE_0877               | Type III secretion system ATPase                      | esaN ETAE_0877 | -                    | -               |
| ETAE_0878               | Type III secretion protein, HrcV family               | esaV ETAE_0878 | -                    | -               |
| ETAE_0879               | Type III secretion apparatus protein                  | esaM ETAE_0879 | -                    | -               |
| ETAE_0880               | Type three secretion apparatus protein R              | esaR ETAE_0880 | -                    | -               |
| ETAE_0881               | Type III secretion apparatus                          | esaS ETAE_0881 | -                    | -               |
| ETAE_0882               | Type III secretion apparatus protein                  | esaT ETAE_0882 | -                    | -               |
| ETAE_0883               | Type III secretion apparatus protein                  | esaU ETAE_0883 | -                    | -               |
| ETAE_0884               | Putative transglycosylase signal peptide protein      | ETAE_0884      | -                    | -               |
| ETAE_0885               | Two-component sensor/regulator EsrA                   | esrA ETAE_0885 | -                    | -               |
| ETAE_0886               | Two-component response regulator EsrB, LuxR family    | esrB ETAE_0886 | -                    | -               |
| ETAE_0861-62            | /                                                     | /              | -                    | -               |
| ETAE_0863-64            | /                                                     | /              | -                    | -               |
| ETAE_0873-74            | /                                                     | /              | -                    | -               |
| ETAE_0879-80            | /                                                     | /              | -                    | -               |
| ETAE_2071               | Transcriptional regulator, DeoR family                | ETAE_2071      | -                    | -               |
| ETAE_0323               | Putative invasin                                      | ETAE_0323      | -                    | -               |
| ETAE_1437               | Probable transcriptional regulatory protein ETAE_1437 | ETAE_1437      | -                    | -               |
| ETAE_1039               | Copper transporter                                    | ybaR ETAE_1039 | -                    | -               |
| ETAE_1720               | Putative porin                                        | ETAE_1720      | -                    | -               |
| ETAE_2185               | Uncharacterized protein                               | ETAE_2185      | -                    | -               |
| ETAE_3320               | Glycerol-3-phosphate transporter permease             | ugpA ETAE_3320 | -                    | -               |
| ETAE_1709               | DNA replication terminus site-binding protein         | tus ETAE_1709  | -                    | -               |
| ETAE_3474               | HTH-type transcriptional repressor FabR               | fabR ETAE_3474 | -                    | -               |
| ETAE_3493               | Glutamine synthetase                                  | glnA ETAE_3493 | -                    | -               |



**Table S14 Bacterial strains and plasmids used in this study**

| Strain or plasmid                                                        | Genotype                                                                                                                     |
|--------------------------------------------------------------------------|------------------------------------------------------------------------------------------------------------------------------|
| <u><i>Escherichia coli</i></u>                                           |                                                                                                                              |
| SM10 $\lambda$ pir                                                       | <i>thi thr leu tonA lacy supE recA::RP4-2-Tc::Mu, pirR6K, Kan<sup>r</sup></i>                                                |
| DH5a $\lambda$ pir                                                       | <i><math>\lambda</math>pir lysogen D(ara-leu) araD D(lacX74) phoA20 thi-1 rpoB argE (am) recA1</i>                           |
| BL21(DE3)                                                                | Host for protein expression                                                                                                  |
| <u>Plasmid</u>                                                           |                                                                                                                              |
| pMKGR                                                                    | Mariner Himar1 transposon encoding a gentamycin resistance gene. Suicide plasmid, <i>pir</i> dependent, R6K, Gm <sup>r</sup> |
| pDM4                                                                     | Suicide plasmid, <i>pir</i> dependent, R6K, SacBR, Cm <sup>r</sup>                                                           |
| pDMK                                                                     | pDM4 derivative with Kan resistance gene inserted in Sall site, Kan <sup>r</sup> , Cm <sup>r</sup>                           |
| pUTt                                                                     | Complementation vector. Amp <sup>r</sup>                                                                                     |
| pET28b-HisSumo                                                           | Protein expression vector. Km <sup>r</sup>                                                                                   |
| pET28b-HisSumo- <i>evrA</i>                                              | Protein expression vector, Km <sup>r</sup>                                                                                   |
| pET28b-HisSumo- <i>evrA</i> <sup>R221A</sup>                             | Protein expression vector. Km <sup>r</sup>                                                                                   |
| pET28b-HisSumo- <i>evrA</i> <sup>R7A</sup>                               | Protein expression vector. Km <sup>r</sup>                                                                                   |
| pET28b-HisSumo- <i>evrA</i> <sup>R178A</sup>                             | Protein expression vector. Km <sup>r</sup>                                                                                   |
| pUTt- <i>evrA</i>                                                        | Complementation vector. ETAE 2071. Amp <sup>r</sup>                                                                          |
| pUTt-P <sub><i>eseB</i></sub> -EGFP                                      | Complementation vector, <i>eseB</i> promoter driven EGFP exprssion, Amp <sup>r</sup>                                         |
| pUTt-P <sub><i>eseB</i></sub> - <i>luc</i>                               | Complementation vector, <i>eseB</i> promoter driven luciferase exprssion, Amp <sup>r</sup>                                   |
| pUTt-P <sub><i>esrB</i></sub> - <i>luxAB</i>                             | Complementation vector, <i>esrB</i> promoter driven luxAB exprssion, Amp <sup>r</sup>                                        |
| pUTt-P <sub><i>esrC</i></sub> - <i>luxAB</i>                             | Complementation vector, <i>esrC</i> promoter driven luxAB exprssion, Amp <sup>r</sup>                                        |
| <u><i>Edwardsiella piscicida</i></u>                                     |                                                                                                                              |
| EIB202                                                                   | Wild type strain, CCTCC M 208068, Col <sup>r</sup> , Cm <sup>r</sup> , Kan <sup>s</sup>                                      |
| wt_ΔP                                                                    | EIB202, pEIB202 cured, Col <sup>r</sup> , Cm <sup>s</sup> , Kan <sup>s</sup>                                                 |
| EIB202::Tn                                                               | EIB202, transposon insertion mutant, labelling mCherry, locus between ETAE_3351 and ETAE_3352                                |
| <i>esrB</i> ::Tn                                                         | EIB202, transposon insertion mutant                                                                                          |
| <i>eseB</i> ::Tn                                                         | EIB202, transposon insertion mutant                                                                                          |
| 2071::Tn                                                                 | EIB202, transposon insertion mutant                                                                                          |
| <i>pdhR</i> ::Tn                                                         | EIB202, transposon insertion mutant                                                                                          |
| 2342::Tn                                                                 | EIB202, transposon insertion mutant                                                                                          |
| <i>esaB</i> ::Tn                                                         | EIB202, transposon insertion mutant                                                                                          |
| <i>esaM</i> ::Tn                                                         | EIB202, transposon insertion mutant                                                                                          |
| ΔwaaQ                                                                    | EIB202, in-frame deletion of ETAE_0075                                                                                       |
| ΔwalW                                                                    | EIB202, in-frame deletion of ETAE_0076                                                                                       |
| ΔwabK                                                                    | EIB202, in-frame deletion of ETAE_0079                                                                                       |
| Δ <i>esrA</i>                                                            | EIB202, in-frame deletion of <i>esrA</i>                                                                                     |
| Δ <i>esrB</i>                                                            | EIB202, in-frame deletion of <i>esrB</i>                                                                                     |
| Δ <i>esrC</i>                                                            | EIB202, in-frame deletion of ETAE_0861                                                                                       |
| Δ <i>eseB</i>                                                            | EIB202, in-frame deletion of ETAE_0872                                                                                       |
| Δ <i>esaM</i>                                                            | EIB202, in-frame deletion of ETAE_0879                                                                                       |
| Δ <i>nuoM</i>                                                            | EIB202, in-frame deletion of ETAE_2374                                                                                       |
| Δ <i>nuoJ</i>                                                            | EIB202, in-frame deletion of ETAE_2377                                                                                       |
| Δ <i>nuoI</i>                                                            | EIB202, in-frame deletion of ETAE_2378                                                                                       |
| Δ <i>evpP</i>                                                            | EIB202, in-frame deletion of ETAE_2428                                                                                       |
| Δ <i>evpC</i>                                                            | EIB202, in-frame deletion of ETAE_2431                                                                                       |
| Δ <i>evpI</i>                                                            | EIB202, in-frame deletion of ETAE_2437                                                                                       |
| Δ <i>manX</i>                                                            | EIB202, in-frame deletion of ETAE_1559                                                                                       |
| Δ <i>evrA</i>                                                            | EIB202, in-frame deletion of ETAE_2071                                                                                       |
| Δ <i>evrA</i> +pUTt                                                      | EIB202, in-frame deletion of ETAE_2071 complemented with pUTt vector                                                         |
| Δ <i>evrA</i> +pUTt-2071                                                 | EIB202, in-frame deletion of ETAE_2071 complementation                                                                       |
| Δ <i>evrA</i> Δ <i>esrB</i>                                              | EIB202, double in-frame deletion of ETAE_2071 and <i>esrB</i>                                                                |
| Δ <i>evrA</i> Δ <i>esrB</i> +pUTt-P <sub><i>esrB</i></sub> - <i>esrB</i> | EIB202, double in-frame deletion of ETAE_2071 and <i>esrB</i> complemented with <i>esrB</i> driven by its own promoter       |
| Δ <i>evrA</i> Δ <i>esrB</i> +pUTt-P <sub><i>lac</i></sub> - <i>esrB</i>  | EIB202, double in-frame deletion of ETAE_2071 and <i>esrB</i> complemented with <i>esrB</i> driven by <i>lac</i> promoter    |
| Δ <i>evrA</i> +P <sub><i>eseB</i></sub> - <i>luc</i>                     | EIB202, in-frame deletion of ETAE_2071 complemented with luciferase driven by <i>eseB</i> promoter                           |
| WT+P <sub><i>eseB</i></sub> - <i>luc</i>                                 | EIB202, wild type complemented with luciferase driven by <i>eseB</i> promoter                                                |

**Table S15 Primers used in this study**

| <b>primer name</b>                                           | <b>primer sequence</b>                             |
|--------------------------------------------------------------|----------------------------------------------------|
| <b>transposon mutant library construction and validation</b> |                                                    |
| evpP-F                                                       | TCATCGCACATACAGAATAAACGCC                          |
| evpP-R                                                       | CCGTAACATTTCTTACAACACTGCG                          |
| pG1                                                          | AGGTGATGCTACATACGGAAAG                             |
| pmh1                                                         | AGCGCATGAACCTCTTGATG                               |
| PpMar1                                                       | AAAAGTCCGCTGGCAAAG                                 |
| PpMar2                                                       | CCCTTCAAGAGCGATACAAC                               |
| Sp1                                                          | GCTCCGTAGTAAGACATTCATCGCG                          |
| Sp2                                                          | GCTTACGTTCTGCCAAGTTTGAG                            |
| ABS                                                          | GGCCACGCGTCTGACTAGTAC                              |
| AB2                                                          | GGCCACGCGTCTGACTAGTACNNNNNNNNNNCCTGG               |
| Seq2                                                         | CAATTCGTTCAAGCCGAGATCG                             |
| <b>mutants construction</b>                                  |                                                    |
| pDMK-2071-P1                                                 | ccccccgagctcaggttaccggatctatGGCCAGATAGCTCAGCGCATCG |
| pDMK-2071-P2                                                 | CGCAGGATCACATAGTGTCTGTGCGGGCAG                     |
| pDMK-2071-P3                                                 | GGACACTATGTGATCCTGCGCAGAGAAAAATC                   |
| pDMK-2071-P4                                                 | gagtacgcgtcactagtggggccccttagCGGGATGCGTCTGGATAACT  |
| pDMK-2071-in-F                                               | AGCTACCTCAAGCGGGTGCA                               |
| pDMK-2071-in-R                                               | GAAC TTGGAGGCGTGGTCA                               |
| pDMK-2071-out-F                                              | GCTCGGCAACCAGCAGCGTAT                              |
| pDMK-2071-out-R                                              | GTGCTAATCCCACCGTCCCT                               |
| pDM4-esrA-P1                                                 | ccccccgagctcaggttaccggatctatTGGTGCTCCGCTTAAATGG    |
| pDM4-esrA-P2                                                 | AGTTTTAATCCATAGGGGATTCCTTTATG                      |
| pDM4-esrA-P3                                                 | ATCCCCTATGGATTA AAACTCCAGAACCCC                    |
| pDM4-esrA-P4                                                 | gagtacgcgtcactagtggggccccttagCGGCGTTGACGTGATCCGTC  |
| pDM4-esrA-in-F                                               | GCCGAAACGGTCTATGAGC                                |
| pDM4-esrA-in-R                                               | CCTCGTCAA AATTACTCTCC                              |
| pDM4-esrA-out-F                                              | TGGAGAATATTCCGCTGGC                                |
| pDM4-esrA-out-R                                              | GGGCTGGCCGTTTATGAGG                                |
| pDM4-eseB-P1                                                 | gtggaattccccgggagagctCACCCGAGAAAAACCAACG           |
| pDM4-eseB-P2                                                 | GGCCTCCTTACATAGTGTCTCTCTCTGAG                      |
| pDM4-eseB-P3                                                 | GAGCACTATGTAAGGAGGCCACGATGACCG                     |
| pDM4-eseB-P4                                                 | aagcttatcgataccgtcgaGAACTGACGCAGTATTTCCC           |
| pDM4-eseB-in-F                                               | CGATAGCATCATGTCCGAC                                |
| pDM4-eseB-in-R                                               | CTGGGTGACAAAGTCGGAGC                               |
| pDM4-eseB-out-F                                              | CGGCTGGACGATGGCTGG                                 |
| pDM4-eseB-out-R                                              | GGTGATCGTGCTGCGACTGC                               |
| pDM4-esaM-P1                                                 | gtggaattccccgggagagctAGCTCTTTGTGCGCCACCTG          |
| pDM4-esaM-P2                                                 | TAGCCAGCTACATGAATATCCTCCGCGATC                     |
| pDM4-esaM-P3                                                 | GATATTCATGTAGCTGGCTACACAAACTC                      |
| pDM4-esaM-P4                                                 | aagcttatcgataccgtcgaCTGCACGACGGTAATGATGG           |
| pDM4-esaM-in-F                                               | GCAAACCGAACTTTGGCTAC                               |
| pDM4-esaM-in-R                                               | CATGGGGATTCTCCATCACG                               |
| pDM4-esaM-out-F                                              | CGACACCATCATCATCCCC                                |
| pDM4-esaM-out-R                                              | AGAGCTGGCTCTCTTTTTGC                               |
| pDM4-waaQ-P1                                                 | gtggaattccccgggagagctATAGCCGCTGTAGTCACTAC          |
| pDM4-waaQ-P2                                                 | AATTGGGTCACATTCTTTTGCCTTTGACTG                     |
| pDM4-waaQ-P3                                                 | CAAAGAATGTGACCCAATTCAGATTGGC                       |
| pDM4-waaQ-P4                                                 | aagcttatcgataccgtcgaTGGCATTGTAGATGACGTGG           |
| pDM4-waaQ-in-F                                               | GGATATGTTGTGCGGCTAATC                              |
| pDM4-waaQ-in-R                                               | CGGAGGTGAGCAAAATAGGG                               |
| pDM4-waaQ-out-F                                              | CAGGTGATTAACAGCGGAG                                |
| pDM4-waaQ-out-R                                              | GACATAGATCAGGCAGGAGG                               |
| pDM4-walW-P1                                                 | gtggaattccccgggagagctGCTATATCCCATGGTGACGC          |
| pDM4-walW-P2                                                 | AACGAAATTACATACTGATACGTCTTCTTC                     |
| pDM4-walW-P3                                                 | TATCAGTATGTAATTTCTGTTTGGGCGCATG                    |
| pDM4-walW-P4                                                 | aagcttatcgataccgtcgaCTAGAGGCTGGAACCTATGG           |

pDM4-walW-in-F CCGCTATTTGCCTCGATTCC  
pDM4-walW-in-R GCGTCCACAAAATAGGCG  
pDM4-walW-out-F GAGAGCATTAAATGACCTCGC  
pDM4-walW-out-R CCGCATCATTGCTATATCG  
pDM4-wabK-P1 gtggaattcccgggagagctGCATCGTTTTATTAGCTGGC  
pDM4-wabK-P2 TCATTATCTACATGTTATACTTGCTCCGAT  
pDM4-wabK-P3 GTATAACATGTAGATAATGAATATCGCCCAC  
pDM4-wabK-P4 aagcttatcgataccgtcgaGGGAGCAACCAGCGTTTTATC  
pDM4-wabK-in-F GTTGAGCGTCTTATTTTAGAC  
pDM4-wabK-in-R GCAATCAGGGGAAGTAATCC  
pDM4-wabK-out-F CGATAGATTCTATCCAATCC  
pDM4-wabK-out-R TCCACATAATAGTTTTGCC  
pDM4-nuoM-P1 gtggaattcccgggagagctCCGAATGATCTTCATCGTGT  
pDM4-nuoM-P2 TGGCGATTTACATGGCGTTTGGTTTCCCTT  
pDM4-nuoM-P3 AAACGCCATGTAAATCGCCATGACAATAAC  
pDM4-nuoM-P4 aagcttatcgataccgtcgaCTCTATCCCCAGGAACAGCG  
pDM4-nuoM-in-F GCTGAAAGCGCCGCGCTGG  
pDM4-nuoM-in-R CGATCAGGAAGTACATCGGC  
pDM4-nuoM-out-F GCAGAACATCTTCAAGATG  
pDM4-nuoM-out-R CGGCGAAGGAGAGATCGC  
pDM4-nuoJ-P1 gtggaattcccgggagagctGCTGGCGTATTTGCCTGCC  
pDM4-nuoJ-P2 AACGGGATCACATGCTCGGCTCCTTAGGG  
pDM4-nuoJ-P3 GCCGAGCATGTGATCCCGTTACAACATGGG  
pDM4-nuoJ-P4 aagcttatcgataccgtcgaCGGGAAAAGGCCAGGATCAG  
pDM4-nuoJ-in-F CCGTGTTGGCGACGATCCG  
pDM4-nuoJ-in-R CAGCATCGAGACCAGCTCC  
pDM4-nuoJ-out-F CACCCTGTTCTTCGGCGGC  
pDM4-nuoJ-out-R CGGTAAAGTTACCGACCGC  
pDM4-nuol-P1 gtggaattcccgggagagctCTGTTCTTCCTGATGATGGC  
pDM4-nuol-P2 CGGCTCCTTATGTCATGGTTACACTCACC  
pDM4-nuol-P3 AACCATGACATAAGGAGCCGAGCATGGAAT  
pDM4-nuol-P4 aagcttatcgataccgtcgaCAATGTGGAAGGCCACGAC  
pDM4-nuol-in-F GGTTGGTTTCGGCACCCAAG  
pDM4-nuol-in-R CCATACGGTAAAAGTTGTAG  
pDM4-nuol-out-F GATCAAGATGTTCTTCAAGG  
pDM4-nuol-out-R CTTATTGCTCAGTACCTC  
pDM4-evpC-P1 gtggaattcccgggagagctGCACACCTTTACCACCGATG  
pDM4-evpC-P2 CGTCTTACTTCATAGCGGACCTCTCTTG  
pDM4-evpC-P3 GTCCGCTATGAAGTAAGACGGTCAAACAGG  
pDM4-evpC-P4 aagcttatcgataccgtcgaCCAGCACATTGGACGCCGTC  
pDM4-evpC-in-F CGATAAGCACAAAAATGG  
pDM4-evpC-in-R CATGCGTAAATTTGTAGATG  
pDM4-evpC-out-F CAGGCCTATGCCAAATATGG  
pDM4-evpC-out-R ATGGTCAGCGCGATATAGG  
pDM4-evpl-P1 gtggaattcccgggagagctGTTCTTCCAGGTGTTTGAC  
pDM4-evpl-P2 AAAATCAGTTCAAGGATGCCTTACAGGTG  
pDM4-evpl-P3 GGCATCCTTGAAGTGAATTTTCGCTATCCGC  
pDM4-evpl-P4 aagcttatcgataccgtcgaGTCATACAGCGGGTCCAAGC  
pDM4-evpl-in-F GGCATTTTCTACTGGTTTCG  
pDM4-evpl-in-R GAGACAGATAAAGTGGTTC  
pDM4-evpl-out-F CAACCTGTCGGAGTTTTCAG  
pDM4-evpl-out-R CAGCTGCAGATCTTTGCTGC  
pDM4-manX-P1 gtggaattcccgggagagctCATGGGTTATTCTGCCCTCG  
pDM4-manX-P2 CGGCATATCAAATACTCACTCGCTACCTCC  
pDM4-manX-P3 AGTGAGTATTTGATATGCCGTAAGGCATTG  
pDM4-manX-P4 aagcttatcgataccgtcgaGGTACGTACGATGATGGTC  
pDM4-manX-in-F GTAACGTTGGCTTTATCGAC  
pDM4-manX-in-R GGTTTCCTTGGTCCAGCG

|                                 |                                               |
|---------------------------------|-----------------------------------------------|
| pDM4-manX-out-F                 | ATCAGCGCTAAACTGAGC                            |
| pDM4-manX-out-R                 | GTGACGACCTCCGGAATGG                           |
| pUTt-2071-F                     | ctcatccgcaaaacagccaGCAGCGGCTTCCACAGGTGG       |
| pUTt-2071-R                     | ttaaaaattaaggaggaattTCAGCGGATGCCGTTTTTCAGAG   |
| pUTt-P <sub>eseB</sub> -luc-1   | ctcatccgcaaaacagccaGTTAGTCCTCGGCTGGTGCTGG     |
| pUTt-P <sub>eseB</sub> -luc-2   | cgtcttccatAGTGAAACCTCCTATTGACTAC              |
| pUTt-P <sub>eseB</sub> -luc-3   | aggtttcactATGGAAGACGCCAAAAACATAA              |
| pUTt-P <sub>eseB</sub> -luc-4   | ttaaaaattaaggaggaattTTACACGGCGATCTTTCCGCC     |
| pUTt-P <sub>eseB</sub> -EGFP-1  | ctcatccgcaaaacagccaGTTAGTCCTCGGCTGGTGCTGG     |
| pUTt-P <sub>eseB</sub> -EGFP-2  | tgtagccatAGTGAAACCTCCTATTGACTAC               |
| pUTt-P <sub>eseB</sub> -EGFP-3  | aggtttcactATGGCTAGCAAAGGAGAAG                 |
| pUTt-P <sub>eseB</sub> -EGFP-4  | ttaaaaattaaggaggaattTTATTTGTACAGTTCATCCATG    |
| pET28b-Sumo-2071-F              | tcacagagaacagattggtggatccATGAACGCCAGACAACAACG |
| pET28a-Sumo-2071-R              | agtgggggtggtggtgctcgaTCAGCGGATGCCGTTTTTCAG    |
| pUTt-luxAB-F                    | TGGCTGTTTTGGCGGATGAG                          |
| pUTt-luxAB-R                    | CAAATAAGGAAATGTTATGAAAT                       |
| pUTt-P <sub>esrB</sub> -luxAB-F | ctcatccgcaaaacagccaGTTATCGGCATATAAAAAATATT    |
| pUTt-P <sub>esrB</sub> -luxAB-R | atttcataacatttcctatttgATTTAAAGGGTACTCCGAATC   |
| pUTt-P <sub>esrC</sub> -luxAB-F | ctcatccgcaaaacagccaGCCAACGCCTGATCGACTGC       |
| pUTt-P <sub>esrC</sub> -luxAB-F | atttcataacatttcctatttgAGGTGCTCCTGACTGAGGTAC   |
| <b>qRT-PCR</b>                  |                                               |
| qPCR-esrA-F                     | TAGCGCCGTAGAGAAAACCC                          |
| qPCR-esrA-R                     | TCGCGGCAGATGGAGAATAC                          |
| qPCR-esrB-F                     | CGACCAGCTTGAGAATTTGCC                         |
| qPCR-esrB-R                     | GTAGCCTCGTCCGATATGGC                          |
| qPCR-esrC-F                     | CCATGCCGAACTTGTCGTTG                          |
| qPCR-esrC-R                     | GAGTGTCAACGGACCTCCAC                          |
| qPCR-eseB-F                     | CCCGCTTTCTTGAACCTTGGC                         |
| qPCR-eseB-R                     | ACGCTATTCACCGATCTGGC                          |
| qPCR-eseE-F                     | ATAACGGCCTGTCCATCGTC                          |
| qPCR-eseE-R                     | TTTCTCATGGGACAGCGCAT                          |
| qPCR-evpP-F                     | GAATGGGGACGACTCACCTC                          |
| qPCR-evpP-R                     | AAATCCACCGAACCAGGCAT                          |
| qPCR-evpC-F                     | CGATAAGCACAAAAAATGG                           |
| qPCR-evpC-R                     | CTCCATCGTGCATTTCATTGC                         |
| qPCR-pdhR-F                     | ATCTGTTGGAAACCCGCCAT                          |
| qPCR-pdhR-R                     | TCGCGCAGACGAACAAAATC                          |
| qPCR-2342-F                     | CCATCCCAGACAGGACGAAC                          |
| qPCR-2342-R                     | AGGTGTATGGCTGGATGTGC                          |
| qPCR-2071-F                     | AAAACGCAGCTACCTCAAGC                          |
| qPCR-2071-R                     | AAGATGGTCTCCCCGTGTT                           |
| qPCR-esaM-F                     | CTGAAATCCACAGCGCATCG                          |
| qPCR-esaM-R                     | GGGATCGCGACCGTATCTTT                          |
| RT- <i>gyrB</i> -F              | CCGATGATGGTACGGGTCTG                          |
| RT- <i>gyrB</i> -R              | GCTTTTCAGACAGGGCGTTC                          |
| <b>EMSA</b>                     |                                               |
| EMSA-P <sub>esrB</sub> -F       | tgctgcaggtcgacgatCATGATGATCCATACTCCAAAG       |
| EMSA-P <sub>esrB</sub> -R       | AAACTTCATATAGCTCGCTCGG                        |
| EMSA-P <sub>manX</sub> -F       | tgctgcaggtcgacgatCGGCTACATTTGTTACAGTC         |
| EMSA-P <sub>manX</sub> -R       | ACGCCGTAAAATAAACACGG                          |
| Cy5-F                           | tgctgcaggtcgacgat                             |
| FAM-F                           | tgctgcaggtcgacgat                             |

## 133 **Transparent Methods**

### 134 ***Bacterial strains and culture conditions***

135 A list of the strains used in this study is in [Table S14](#). *E. piscicida* EIB202 cured of the  
136 endogenous plasmid pEIB202, (*E. piscicida* EIB202  $\Delta$ P), was used as the parental strain for  
137 generation of the transposon insertion mutant library. *E. coli* SM10 $\lambda$ pir was used as the donor  
138 for conjugations. *E. piscicida* strains were grown in Luria-Bertani broth (LB) or on LB agar  
139 (LBA) (Oxoid, England) and in Dulbecco's modified Eagle's medium (DMEM) (Invitrogen, USA)  
140 at 28°C. DMEM was used to induce T3/T6SS production as well as to yield auto-aggregation  
141 phenotypes mimicking in macrophages and *in vivo* conditions ([Zheng and Leung 2007](#)).  
142 Where required, antibiotics were supplemented at the following concentrations: polymyxin B  
143 (Col, 20  $\mu$ g/mL), ampicillin (Amp, 100  $\mu$ g/mL), kanamycin (Km, 25  $\mu$ g/mL), streptomycin (Str,  
144 100  $\mu$ g/mL) and gentamicin (Gm, 15  $\mu$ g/mL).

### 145 ***Generation of the MKGR transposon***

146 The transposon derivatives were constructed within pMar2xT7, a vector containing the  
147 *mariner* transposase outside the *Himar1* transposon ([Jacobs et al., 2003](#)). First, an *mcherry*  
148 gene with a constitutive promoter,  $P_{tetA}$ , was inserted into the *DraIII* site in pMar2xT7 (yielding  
149 PMmch). Promoterless *km* and *egfp* with their respective ribosome binding sequences (RBS)  
150 were amplified from the appropriate templates ([Dennis and Zylstra 1998; Gu et al., 2016](#)) and  
151 fused together with overlap PCR ([Table S15](#)) and then the triplet terminator TGACTAGCTAA  
152 and a 48-bp T7 terminator were introduced at the 5' and at 3' ends, respectively. After  
153 sequence verification, the complete amplicon was cloned into the *NheI* site of pMmch, yielding  
154 pMKGR.

### 155 ***Preparation of the transposon mutant library***

156 Transposon insertion mutants were generated by conjugative transfer of pMKGR into *E.*  
157 *piscicida* EIB202 ( $\Delta$ p) from *E. coli* SM10 $\lambda$ pir on LBA plates containing Gm and Col ([Yang et al.,](#)  
158 [2017](#)). The mutants were then manually picked into 96-well plates, containing 200  $\mu$ L LB per  
159 well. After incubation at 28°C for 16-20 h, 20% glycerol was added to the wells and the plates  
160 were stored at -80°C. Transposon insertion sites for each mutant were determined by thermal  
161 asymmetric interlaced PCR (TAIL-PCR) ([Liu and Chen 2007](#)) as follows: the first round of PCR  
162 was performed with a transposon-specific primer SP1 and a degenerate primer AB2 ([Table](#)  
163 [S15](#)). The PCR products were then diluted 12-fold and used as the template for a second  
164 round of PCR, using a nested transposon-specific primer SP2 and a primer ABS that  
165 hybridizes to the defined portion of AB2. The third nested transposon-specific primer Seq2

166 was used for sequencing and the sequencing results were batch mapped by local BLAST  
167 (<https://blast.ncbi.nlm.nih.gov>).

168 Five subset libraries were assembled from the original set of 20,346 unique insertion  
169 mutants to facilitate targeted studies with smaller libraries ([Tables S1-S7](#)). The 1st (2,759  
170 mutants) and 2nd (2,235 mutants) subset libraries each contained distinct insertion mutants  
171 for each disrupted gene, with insertion sites located within the central 40-60% of each coding  
172 sequence. Mutants in genes that only contained a single insertion were preferentially selected  
173 for inclusion in the first subset library. The 3rd subset library (3,705 mutants) contained  
174 transcriptional fusions and priority was given to mutants that had insertions close to beginnings  
175 of ORFs in the creation of this library. The 4th library (2,305 mutants) consisted of insertions  
176 within intergenic regions. The 5th library was a composite composed of equally mixture of  
177 mutants from the 1st, 2nd and 4th subset libraries and contained 7,299 distinct insertion  
178 mutants ([Table S1](#)).

#### 179 **Construction of deletion mutants and complemented strains**

180 In-frame deletion mutants were generated using *sacB*-based allelic exchange ([Yin et al.,](#)  
181 [2018](#)). Overlap PCR was used to generate appropriate DNA fragments for creating in-frame  
182 deletions in each target gene. The fragments were inserted into the suicide vector pDM4 with  
183 Gibson assembly ([Gu et al., 2016](#)) and the resulting plasmids were introduced into *E. coli*  
184 SM10  $\lambda$ *pir* for conjugation into *E. piscicida* EIB202. Transconjugants were selected on LBA  
185 containing Km and Col. Double-crossover events were subsequently selected on LBA  
186 containing 12% sucrose. To complement the *evrA* deletion in  $\Delta$ *evrA*, an intact *evrA* containing  
187 the putative promoter region was amplified and introduced into plasmid pUTt ([Yin et al., 2018](#));  
188 the sequence of the insert was subsequently verified.

#### 189 **Growth conditions for TIS studies**

190 To prepare input inocula for the TIS studies, the 5th composite library ([Table S7](#)) was  
191 grown in LB medium with shaking at 28°C for 12 h, collected by centrifugation at 8,000  $\times$  *g* for  
192 2 min and washed twice with filter sterilized PBS. Then, the input library was subjected to three  
193 selective growth conditions as follows. For growth in DMEM, the input was diluted 1:100 into  
194 DMEM and incubated at 28°C for 24 h after which genomic DNA extraction was performed.  
195 For growth in macrophages, the input was inoculated into J774A.1 cell cultures at an MOI of  
196 10 at 37°C for 2 h, followed by killing of extracellular bacteria with Gm. The J774A.1 cells were  
197 incubated for an additional 4 h and lysed with 1% Triton X-100 as described ([Okuda et al.,](#)  
198 [2009](#)). Bacterial cells from the lysate were pelleted and resuspended into 30 mL LB with

199 shaking at 28°C until OD<sub>600</sub> reached 1.0 (~ 3 h), eliminating DNA contamination from dead *E.*  
200 *piscicida* cells before genomic DNA extraction. For growth in turbot, the input was used to  
201 intraperitoneally (i.p.) inoculate six-month old naïve turbot fish (~100 g), with 3 × 10<sup>6</sup> CFU/fish.  
202 At 14-days post infection (d.p.i.), each output library was generated from pooled livers of 5  
203 cohoused fish. The pooled livers were homogenized and plated on the LBA plates  
204 supplemented with Col and Gm. After overnight incubation at 28°C, bacterial colonies were  
205 scraped, resuspended into fresh LB and ~1:10 back-diluted into 30 mL LB with shaking at  
206 28°C until OD<sub>600</sub> 1.0 before genomic DNA was extracted (Fu et al., 2013).

### 207 **Transposon insertion sequencing (TIS)**

208 TIS libraries were analyzed by the STAT-Tn-seq bioinformatic pipeline (Fu et al., 2013).  
209 Briefly, genomic DNA was extracted and fragmented by sonication. Then, DNA fragments  
210 were end-repaired, A-tailed and P5/P7 adaptor sequences were added by two rounds of PCR.  
211 Experimental triplicate libraries of inputs and outputs were sequenced on an Illumina Miseq  
212 platform; ~ 2 million reads were generated for each library. The sequencing results were  
213 processed with adapter trimming, mapping to the genome, and tallying as described (Fu et al.,  
214 2013). The read counts for each locus were normalized among the three libraries according to  
215 sequencing depth. The fold change of each locus was generated by dividing the output over  
216 the input read counts.

### 217 **HeLa, J774A.1, and turbot macrophage infection assays**

218 HeLa or macrophage cells (J774A.1 and turbot primary macrophages) were seeded at a  
219 density of 1.0 × 10<sup>5</sup> and 3.0 × 10<sup>5</sup> cells/well, respectively, in 24-well plates and incubated  
220 overnight at 37°C with 5% CO<sub>2</sub>. *E. piscicida* cultures were inoculated into fresh DMEM and  
221 statically grown for 12 h at 28°C. J774A.1 or HeLa cells were infected with *E. piscicida* at an  
222 MOI of 10 or 100, respectively, followed by centrifugation at 600 × *g* for 10 min to facilitate  
223 bacterial attachment to cells. After 2 h infection, cells were washed twice with PBS. DMEM  
224 was added into cell cultures with 50 µg/mL Gm to kill extracellular bacteria and cells were  
225 incubated at 37°C with 5% CO<sub>2</sub> for another 4-6 h. Then the cultures were treated for 10 min  
226 with 1% Triton X-100 to disrupt the cells. Intracellular bacteria were enumerated by serial  
227 dilution plating on LBA. For lactate dehydrogenase (LDH) detection, supernatants were  
228 transferred to a new centrifuge tube and spun at 5,000 × *g* for 5 min at 4°C and LDH was  
229 measured with a CytoTox 96 assay kit (Promega, USA). For fluorescence microscopy, cells  
230 were washed twice with PBS and fixed with 4% paraformaldehyde for 10 min, washed with  
231 PBS, permeabilized with 0.1% Triton X-100 for 5 min, and washed with PBS again. Nuclei

232 were stained with DAPI (Beyotime Biotechnology, China) for 30 s, washed 3x with PBS, and  
233 coverslips were sealed with nail polish. Images were acquired by a Nikon A1R confocal  
234 microscope and analyzed with NIS-Elements Viewer (Nikon, Japan).

#### 235 **Total RNA extraction and qRT-PCR**

236 Overnight cultures of WT and  $\Delta evrA$  were cultured statically in DMEM or DMEM  
237 supplemented with various sugars at 28°C for 12 h, respectively. RNA samples were extracted  
238 with a commercial RNA isolation kit (Tiangen, China) and mRNA was reverse-transcribed into  
239 cDNA using the FastKing RT kit (Tiangen, China). qRT-PCR was performed with an Applied  
240 Biosystems 7500 cycler (Applied Biosystems, USA) with triplicate reactions for each sample.  
241 The comparative  $C_T$  ( $2^{-\Delta\Delta C_T}$ ) method (Gu et al., 2016) was used to quantify the relative levels  
242 of each transcript with the housekeeping *gyrB* gene as an internal control and the specific  
243 primer pair (Yin et al., 2018).

#### 244 **RNA-seq**

245 For preparation of mRNA for RNA-seq, the Ribo-Zero-rRNA kit (Epicentre, USA) was  
246 initially used to remove rRNA from the RNA samples. The final concentration of RNA samples  
247 was determined with a Qubit 2.0 Fluorometer (Thermo Fisher, USA). The VAHTS Stranded  
248 mRNA-seq Library Prep Kit for Illumina (Vazyme, China) was used to construct strand-specific  
249 RNA-seq libraries, and sequencing was conducted on an Illumina HiSeq 2500 platform,  
250 yielding 101-bp paired end-reads. Adapter sequences and low-quality bases (PHRED quality  
251 scores  $\leq 5$ ) were trimmed with the Trimmomatic package (Bolger et al., 2014) using the default  
252 parameters and reads smaller than 35 bp were discarded. The RNA-seq data processing  
253 procedures and statistical analysis were performed (Tjaden 2015). The SRA accession  
254 number for the RNA-seq data is SRP156435.

#### 255 **SDS-PAGE and Western blotting analysis**

256 Whole cell proteins (WCPs) and extracellular proteins (ECPs) were extracted and  
257 concentrated (Yin et al., 2018; Zheng and Leung 2007). Overnight cultures of *E. piscicida* were  
258 subcultured into 50 mL fresh DMEM and statically incubated for 24 h at 28°C; bacteria were  
259 then harvested by centrifugation at 5,000  $\times g$  for 10 min at 4°C for WCPs. For ECPs, culture  
260 supernatants were filtered with 0.22  $\mu\text{m}$  filters (Millipore, USA), and concentrated using 10 kDa  
261 cutoff centrifugal filter devices (Millipore, USA). Proteins were separated by 12% SDS-PAGE,  
262 followed by Coomassie Blue staining or Western blotting. For Western blots, separated  
263 proteins were wet transferred onto PVDF membranes (Millipore, USA) and incubated with a  
264 1:1000 dilution of mouse anti-EseB (GL Biochem, China). HRP-conjugated anti-mouse IgG



265 (Santa Cruz Biotechnology, CA) was used at a 1:2,000 dilution as a secondary antibody.  
266 Proteins were visualized with TMB substrate (Amresco, USA). Mouse anti-DnaK (Santa Cruz  
267 Biotechnology, USA) was used as a cytoplasmic protein control.

### 268 **Luminescence and fluorescence assays**

269 For assays involving luminescence and fluorescence, pUTt derivative plasmids bearing  
270  $P_{esrB}$ -*luxAB*,  $P_{esrC}$ -*luxAB* and  $P_{eseB}$ -*luc* (luciferase) reporters were introduced into WT and  
271  $\Delta$ *evrA* *E. piscicida*. For luminescence assays, strains were inoculated into 50 mL DMEM and  
272 statically incubated at 28°C. Pellets of 150  $\mu$ L culture of each strain were mixed with 40  $\mu$ L  
273 capraldehyde dissolved in ethanol as substrate, and OD<sub>600</sub> was determined using a Microplate  
274 Reader (Bio-Tek, USA) and luminescence values were monitored using a Microplate  
275 Luminometer Orion II (Titertek-Berthold, Germany) every 2 hours.

276 For *in vivo* fluorescence detection, overnight cultures of WT+ $P_{eseB}$ -*luc* and  
277  $\Delta$ *evrA*+ $P_{eseB}$ -*luc* were i.p. injected into turbot. At 5 d.p.i., the fish were anesthetized with  
278 tricaine methanesulfonate (MS-222) (Sigma-Aldrich, USA) and i.p. injected 100  $\mu$ L of a 1  
279 mg/mL beetle luciferin solution (Promega, USA). At 10 min post-injection, fluorescence was  
280 detected with a Kodak In-Vivo Multispectral System FX (Carestream Health, USA). After  
281 fluorescence measurements were taken, the fish were killed with overdose of MS-222 and  
282 livers from each fish were obtained for bacterial CFU plating (Yin et al., 2018).

### 283 **Protein purification**

284 Recombinant EvrA (WT and mutant variants) with N-terminal HisSumo tags were purified  
285 from BL21 (DE3) *E. coli*. Expression of the EvrA-HisSumo fusion was induced by growth in LB  
286 medium supplemented with 0.2 mM isopropyl  $\beta$ -D-1-thiogalacto-pyranoside at 22°C at 200  
287 rpm. At 18 h post-induction, the cells were harvested by centrifugation, resuspended in lysis  
288 buffer (20 mM Tris, 500 mM NaCl, pH 9.0) and lysed with a French press (Glen Mills, USA).  
289 Following centrifugation at 12,000 rpm for 30 min, the supernatant was loaded onto a  
290 pre-packed Ni-NTA column (GE Healthcare, Sweden) for purification. The loaded column was  
291 washed with a lysis buffer gradient supplemented with 40-100 mM imidazole on an ÄKTA  
292 protein purification system (GE, Healthcare, Sweden). Proteins were eluted with lysis buffer  
293 supplemented with 500 mM imidazole. The SUMO protease ULP1 (Thermo Fisher, USA) was  
294 added into the purified protein at the ratio 1:500 to digest HisSumo tag at 4°C in statics. After  
295 digestion of the HisSumo tag with ULP1 for 10 h, reaction mixtures were reloaded on to a  
296 Ni-NTA column to isolate EvrA protein in the flowthrough. Purified proteins were stored in 10%  
297 glycerol at 4°C and their purity was confirmed by SDS-PAGE. Protein concentrations were

298 determined by the bicinchoninic acid protein assay (Thermo Fisher, USA).

299 ***Electrophoretic mobility shift assay (EMSA) and DNase I footprinting assay***

300 For EMSAs, purified EvrA protein was incubated with Cy5-labeled DNA probes ( $P_{esrB}$ ,  
301  $P_{esrC}$ , and  $P_{manX}$ ) (Genewiz, China) in 20  $\mu$ L of binding buffer (10 mM Tris, 50 mM KCl, 5 mM  
302  $MgCl_2$ , 0.1 mM DTT, pH 7.4). In all EMSA analysis, excess (10-fold) of the nonspecific  
303 competitor poly(dI-dC) was used to determine the specificity of the binding. After incubation at  
304 25°C for 30 min, the samples were loaded on a 6% polyacrylamide gel and electrophoresed in  
305 0.5  $\times$  TBE (Tris/Boric acid/EDTA) buffer at 4°C at 100 V for 120 min. Gels were imaged using a  
306 Typhoon FLA 9500 (GE Healthcare, Sweden) with the Cy5 channel set at a 531 nm excitation  
307 wavelength (Gu et al., 2016).

308 Dye primer-based DNase I footprinting assays were performed (Gu et al., 2016). Briefly,  
309 the promoter region of *esrB* was PCR-amplified to include a 6-FAM moiety at the 5' end (S14  
310 Table). For each assay, 200 ng of probe was incubated without or with the presence of 200 ng  
311 EvrA in a total volume of 40  $\mu$ L. After the mixture was incubated for 30 min at 25°C, a 10  $\mu$ L  
312 solution containing approximately 0.015 units of DNase I (Promega, USA) and 100 nmol of  
313 freshly prepared  $CaCl_2$  was added. The mixture was then incubated for 1 min at 25°C. The  
314 reaction was stopped by adding 140  $\mu$ L of DNase I stop solution (200 mM unbuffered sodium  
315 acetate, 30 mM EDTA and 0.15% SDS). The samples were first extracted using  
316 phenol/chloroform and then precipitated using ethanol, and the pellets were dissolved in 10  $\mu$ L  
317 of MilliQ water. Approximately 2  $\mu$ L of digested DNA was added to 7.9  $\mu$ L of HiDi formamide  
318 (Applied Biosystems, USA) and 0.1  $\mu$ L of GeneScan-500 LIZ size standards (Applied  
319 Biosystems, USA). The samples were analyzed using a 3730 DNA Analyzer with a G5 dye set  
320 that was run on an altered default genotyping module that increased the injection time to 30 s  
321 and the injection voltage to 3 kV. The results were analyzed using GeneMapper 4.0 (Applied  
322 Biosystems, USA).

323 ***Chromatin immunoprecipitation quantitative PCR (ChIP-qPCR)***

324 ChIP-qPCR was performed (Liu et al., 2017). Briefly, strains expressing functional  
325 FLAG-tagged EvrA or FLAG only vectors (WT+EvrA-Flag and WT+Flag) (Fig. S7C) were  
326 cultured in DMEM at 28°C for 12 h without shaking. Bacteria were treated with 1%  
327 formaldehyde at room temperature for 10 min and the cross-linking reaction was stopped with  
328 125 mM glycine. The bacteria were then washed twice with cold sterile PBS and resuspended  
329 in 5 mL of SDS lysis buffer (Liu et al., 2017). Next, the bacteria were sonicated, and the DNA  
330 was fragmented to 100-500 bp at 200 W (Diaenode, USA). Insoluble cellular debris was

331 removed via centrifugation, and the supernatant was used as the input sample in IP  
332 experiments. Both the input and the IP samples were washed with 50  $\mu$ L protein G beads for 1  
333 h, and incubated overnight with 30  $\mu$ L anti-Flag M2 magnetic beads (Sigma-Aldrich, USA).  
334 The beads were washed twice with 1 mL of each of the following buffers: low salt wash buffer,  
335 high salt wash buffer, LiCl wash buffer, and standard TE buffer (Liu et al., 2017). The beads  
336 were resuspended in 200  $\mu$ L of elution buffer, incubated at 65°C for 2 h, and then centrifuged  
337 at 5,000  $\times g$  for 1 min. The supernatants containing the immunoprecipitated DNA were  
338 collected, and 8  $\mu$ L of 5 M NaCl was added to all of the tubes (IPs and Inputs). The tubes were  
339 then incubated at 65°C overnight to reverse the DNA-protein crosslinks. After treatment with  
340 RNase A (10  $\mu$ g/mL) and Proteinase K (1 mg/mL), the enriched DNA was purified using  
341 phenol-chloroform and amplified using qPCR.

342 For each DNA target,  $\Delta C_T$  of the Input fraction and IP fraction was calculated in both the  
343 WT+EvrA-Flag and WT+Flag samples. Each value was then divided by the corresponding  $\Delta C_T$   
344 that was obtained for the non-specific *gyrB* intragenic region in the strains. Then, the  
345 enrichment ratio was calculated from the  $\Delta\Delta C_T$  value in WT+EvrA-Flag strain divided by that of  
346 WT+Flag strain. The formula of EvrA binding is as following:  $(\Delta\Delta C_T) = IP\{[C_T (WT+EvrA-Flag)$   
347  $- C_T (WT+Flag)] - C_T(gyrB)\} - Input\{[C_T (WT+EvrA-Flag) - C_T (WT+Flag)] - C_T(gyrB)\}$ .

#### 348 **Electrospray ionization mass spectrometry (ESI-MS)**

349 ESI-MS based determination of EvrA interaction with man-6P (Zhou et al., 2018). Purified  
350 EvrA (20  $\mu$ M) was buffer-exchanged into 100 mM ammonium acetate (pH 7.5) using a  
351 centrifugal buffer exchange column (Micro Bio-Spin 6, Bio-Rad, USA), and one aliquot was  
352 denatured by adding formic acid to a final concentration of 0.1%. Both native (non-formic  
353 acid-treated) and denatured protein samples were analyzed by direct infusion. Specifically, 15  
354  $\mu$ L of each protein sample was loaded into a nano-flow borosilicate emitter (NanoES spray  
355 capillaries, Thermo Scientific, USA) and sprayed into an Orbitrap Fusion mass spectrometer  
356 through a Nanospray FLEX Ion Source (Thermo Scientific, USA). The mass spectrometer  
357 settings were: spray voltage 1.3 kV for native samples and 2.2 kV for denatured samples;  
358 S-lens RF level of 150, SID 100 for complete desolvation of the native protein sample; capillary  
359 temperature at 150°C for native protein samples or 300°C for denatured samples; scan range  
360 1500–5500 m/z for native samples and 1000–5000 for denatured samples; intact protein mode  
361 with trapping gas pressure set as 0.2. Mass spectra were analyzed using Thermo Scientific  
362 Protein Deconvolution software (Thermo Scientific, USA). The parameters for spectra analysis  
363 were specified according to the mass spectrometer settings. The minimum adjacent range of

364 charges was 4–8 for native proteins or 5–10 for the denatured proteins, and mass tolerance  
365 was 30 p.p.m. The deconvoluted mass of the most abundant ion was selected as the mass of  
366 the target protein. The mass of the bound ligand was calculated as the difference between the  
367 native protein and the denatured protein.

### 368 ***Turbot virulence and competitive index assays***

369 Turbot experiments were performed according to protocols approved by the Animal Care  
370 Committee of the East China University of Science and Technology (2006272) and the  
371 Experimental Animal Care and Use Guidelines from the Ministry of Science and Technology of  
372 China (MOST-2011-02). Healthy turbot weighing  $30.0 \pm 3.0$  g (~ 2 months' old and ~1:1 female  
373 to male) were obtained from a commercial farm (Yantai, China) and acclimatized to laboratory  
374 conditions for at least 7 days. Competitive assays were performed between WT or the  
375 indicated gene-deletion mutant strains and WT( $\Delta$ p), the WT strain cured of its endogenous Cm  
376 and Str resistance plasmid pEIB202 (Wang et al., 2009). WT( $\Delta$ p) does not exhibit impaired  
377 growth in LB, DMEM, J774A.1 or turbot. Inocula were prepared using fresh cultures of bacteria  
378 that were diluted and mixed at a 1:1 ratio. The i.p. injection dose was  $\sim 10^5$  CFU/fish in a 100  
379  $\mu$ L inoculum. At 8 d.p.i., the livers from fish in each group (5 animals/group) were sampled,  
380 homogenized and plated on LBA plates with or without the presence of 34  $\mu$ g/mL  
381 chloramphenicol (Cm) to distinguish WT( $\Delta$ p) (Cm<sup>s</sup>) or other strains (Cm<sup>r</sup>) (Yang et al., 2017)  
382 and enumerate the ratio of the competing strains. The ratios of the bacterial counts were used  
383 to determine competitive indices.

384 For fish survival assays, overnight cultures were harvested by centrifugation at  $8,000 \times g$   
385 for 2 min at 4°C and washed three times with PBS. A total of  $2.0 \times 10^4$  CFU bacteria  
386 suspended in PBS containing 5 mg/mL mannose or glucose was i.p. injected into each fish;  
387 PBS or PBS supplemented with 5 mg/mL mannose and glucose was used as negative control.  
388 A total of 30 fish were injected with each strain and fish mortality was monitored daily. The  
389 infection experiments were performed at least three independent times.

### 390 ***Turbot macrophage separation***

391 The separated head kidney of turbot fishes was homogenized with woven nylon mesh,  
392 and macrophages obtained from the organ were collected using the continuous gradient  
393 Percoll separation method (Vray and Plasman 1994). Nine volumes of Percoll with 1 volume of  
394 sterile 1.5 M NaCl were mixed to make stock isotonic Percoll (SIP). The initial density of 1.065  
395 g/mL was obtained by mixing 4 mL of the head kidney cell suspension in pH 7.6 heparin/L-15  
396 with 4.2 ml of SIP. To make a self-generated continuous gradient, the prepared sample

397 solution was centrifuged for 20 min, 20,000 × *g*, at 5°C. Macrophages were obtained from the  
398 third band with a density distribution of 1.069-1.075 g/mL. The collected cell suspended  
399 solution was washed three times by centrifugation for 10 min at 300 × *g* and at 4°C with 10 mL  
400 of incomplete L-15. The washed cell suspension was counted with a 0.4% solution of Trypan  
401 Blue in HBSS to determine cell viability.

#### 402 ***Isothermal titration calorimetry (ITC)***

403 All ITC titrations were performed at 25°C using a MicroCal iTC200 instrument (Malvern  
404 Panalytical Ltd). A binding buffer consisting of 20 mM Tris and 500 NaCl (pH 9.0) was used for  
405 all measurements. Assays were performed with 20 total injections with 100 μM EvrA in the  
406 sample cell and 2 mM sugar in the injection syringe. Buffer-only runs were performed to  
407 quantify the heat of dilution for background subtraction from binding runs. Thermal data were  
408 fitted to the One Set of Sites binding model with the *N* value fixed at 1 to yield the equilibrium  
409 dissociation constant ( $K_d$ ) according to the modeling alignment to RpiA (Ishikawa et al., 2002).  
410 Each binding run was carried out at least 2 independent times.

#### 411 ***Quantification of mannose and man-6P/man-1P in bacterial cells and fish tissues***

412 Metabolites quantification was performed (Cheng et al., 2019; Guo et al., 2014). After 5 d.p.i.  
413 with *E. piscicida* WT or PBS as a control, turbot livers and intestines were harvested and  
414 weighted. To extract mannose and its derivatives, 1 mL methanol was added to the liver,  
415 vortexed for 10 s, ultrasonicated for 20 min, and centrifuged for 20 min with 12,000 rpm at 4°C.  
416 700 μL of the resulting supernatant was taken for UPLC-TQS MS/MS (Waters, USA).  
417 UPLC-TQS MS/MS settings were set as follows: column temperature 35°C, sample chamber  
418 temperature 10°C, carrier speed 0.3 ml/min, electronic press of spray 2.5 kV. The sample of  
419 bacterial cells cultivated in DMEM condition was treated with the same procedures.

#### 420 ***Bioinformatics analysis of EvrA***

421 Structural homology modeling of EvrA was performed with Phyre 2.0 (Kelley et al., 2015).  
422 The structural model with the highest confidence was from an alignment to the structure of  
423 RpiA (PDB: 1LK7) (Ishikawa et al., 2002). The Phyre-predicted structure of WT EvrA was used  
424 for ligand (man-6P) docking with AutoDock (<http://autodock.scripps.edu>) with the default  
425 docking parameters and the top ligand-binding site with lowest  $\Delta G$  was selected. Multiple  
426 sequence alignments were performed using ClusterX 1.8, and the phylogenetic tree was  
427 drawn using MEGA 6.0 (Tamura et al., 2013). COG counts were based on the previous COG  
428 annotation of EIB202 genome (Wang et al., 2009). EvrA was searched against Uniprot  
429 database (<https://www.uniprot.org>) to predict its conserved domains. STRING analysis was

430 performed with the default parameters (Szklarczyk et al., 2019).

### 431 **Statistical analysis**

432 GraphPad Prism (version 6.0) was used to perform the statistical analyses. Data are  
433 presented as the mean  $\pm$  SD of triplicate samples per experimental condition unless otherwise  
434 noted. Statistical analyses were performed using unpaired two-tailed Student's *t* test for the  
435 metabolite level analysis, One-way ANOVA analyses followed by Bonferroni's  
436 multiple-comparison post-test comparing the data of CI values, or Kaplan-Meier survival  
437 analysis with a log-rank test. Differences were considered significant at \**P* < 0.05, \*\**P* < 0.01,  
438 and \*\*\**P* < 0.001.

439

### 440 **Supplemental References**

- 441 Bolger, A.M., Lohse, M., and Usadel, B. (2014). Trimmomatic: A flexible trimmer for Illumina  
442 sequence data. *Bioinformatics* 30, 2114-20.
- 443 Cheng, Z.X., Guo, C., Chen, Z.G., Yang, T.C., Zhang, J.Y., Wang, J., Zhu, J.X., Li, D., Zhang,  
444 T.T., Li, H., Peng, B., and Peng, X.X. (2019). Glycine, serine and threonine metabolism  
445 confounds efficacy of complement-mediated killing. *Nat. Commun.* 10, 3325.
- 446 Dennis, J.J., and Zylstra, G.J. (1998). Plasposons: modular self-cloning minitransposon  
447 derivatives for rapid genetic analysis of Gram-negative bacterial genomes. *Appl. Environ.*  
448 *Microbiol.* 64, 2710-5.
- 449 Fu, Y., Waldor, M.K., and Mekalanos, J.J. (2013). Tn-Seq analysis of *Vibrio cholerae* intestinal  
450 colonization reveals a role for T6SS-mediated antibacterial activity in the host. *Cell Host*  
451 *Microbe* 14, 652-63.
- 452 Gu, D., Guo, M., Yang, M.J., Zhang, Y.X., Zhou, X.H., and Wang, Q.Y. (2016). A  $\sigma^E$ -Mediated  
453 temperature gauge controls a switch from LuxR-mediated virulence gene expression to  
454 thermal stress adaptation in *Vibrio alginolyticus*. *PLoS Pathog.* 12, e1005645.
- 455 Guo, C., Huang, X.Y., Yang, M.J., Wang, S., Ren, S.T., Li, H., and Peng, X.X. (2014).  
456 GC/MS-based metabolomics approach to identify biomarkers differentiating survivals from  
457 death in crucian carps infected by *Edwardsiella tarda*. *Fish Shellfish Immunol.* 39,  
458 215-222.
- 459 Ishikawa, K., Matsui, I., Payan, F., Cambillau, C., Ishida, H., Kawarabayasi, Y., Kikuchi, H.,  
460 and Roussel, A. (2002). A hyperthermostable D-ribose-5-phosphate isomerase from  
461 *Pyrococcus horikoshii* characterization and three-dimensional structure. *Structure* 10,  
462 877-886.

463 Jacobs, M.A., Alwood, A., Thaipisuttikul, I., Spencer, D., Haugen, E., Ernst, S., Will, O., Kaul,  
464 R., Raymond, C., Levy, R., Chun-Rong, L., Guenther, D., Bovee, D., Olson, M.V., and  
465 Manoil C. (2003). Comprehensive transposon mutant library of *Pseudomonas aeruginosa*.  
466 Proc. Natl. Acad. Sci. U. S. A. 100, 14339-44.

467 Kelley, L.A., Mezulis, S., Yates, C.M., Wass, M.N., and Sternberg, M.J.E. (2015). The Phyre2  
468 web portal for protein modeling, prediction and analysis. Nat. Protocols 10, 845-858.

469 Liu, Y., Zhao, L.Y., Yang, M.J., Yin, K.Y., Zhou, X.H., Leung, K.Y., Liu, Q., Zhang, Y.X., and  
470 Wang, Q.Y. (2017). Transcriptomic dissection of the horizontally acquired response  
471 regulator EsrB reveals its global regulatory roles in the physiological adaptation and  
472 activation of T3SS and the cognate effector repertoire in *Edwardsiella piscicida* during  
473 infection toward turbot. Virulence 8, 1355-77.

474 Liu, Y.G., and Chen, Y. (2007). High-efficiency thermal asymmetric interlaced PCR for  
475 amplification of unknown flanking sequences. BioTechniques 43, 649-56.

476 Okuda, J., Kiriya, M., Suzaki, E., Kataoka, K., Nishibuchi, M., and Nakai, T. (2009).  
477 Characterization of proteins secreted from a type III secretion system of *Edwardsiella*  
478 *tarda* and their roles in macrophage infection. Dis. Aquat. Organ. 84, 115-21.

479 Szklarczyk, D., Gable, A.L., Lyon, D., Junge, A., Wyder, S., Huerta-Cepas, J., Simonovic, M.,  
480 Doncheva, N.T., Morris, J.H., Bork, P., Jensen, L.J., and von Mering, C. (2019). STRING  
481 v11: protein-protein association networks with increased coverage, supporting functional  
482 discovery in genome-wide experimental datasets. Nucleic Acids Res. 47, D607-613.

483 Tamura, K., Stecher, G., Peterson, D., Filipowski, A., and Kumar, S. (2013). MEGA6: molecular  
484 evolutionary genetics analysis Version 6.0. Mol. Biol. Evol. 30, 2725-2729.

485 Tjaden, B. (2015). De novo assembly of bacterial transcriptomes from RNA-seq data. Genome  
486 Biol. 16, 1.

487 Vray, B., and Plasman, N. (1994). Separation of murine peritoneal macrophages using Percoll  
488 density gradients. J. Immunol. Methods 174, 53-9.

489 Wang, Q.Y., Yang, M.J., Xiao, J.F., Wu, H.Z., Wang, X., Lv, Y.Z., Xu, L.L., Zheng, H.J., Wang,  
490 S.Y., Zhao, G.P., Liu, Q., and Zhang, Y.X. (2009). Genome sequence of the versatile fish  
491 pathogen *Edwardsiella tarda* provides insights into its adaptation to broad host ranges and  
492 intracellular niches. PLoS ONE 4, e7646.

493 Yang, G.H., Billings, G., Hubbard, T.P., Park, J.S., Leung, K.Y., Liu Q., Davis, B.M., Zhang,  
494 Y.X., Wang, Q.Y., and Waldor, M.K. (2017). Time-resolved transposon insertion  
495 sequencing reveals genome-wide fitness dynamics during infection. mBio. 8, e1517-81.

496 Yin, K.Y., Guan, Y.P., Ma, R.Q., Wei, L.F., Liu, B., Liu, X.H., Zhou, X.S., Ma, Y., Zhang, Y.X.,  
497 Waldor, M.K., and Wang, Q.Y. (2018). Critical role for a promoter discriminator in RpoS  
498 control of virulence in *Edwardsiella piscicida*. PLoS Pathogen. 14, e1007272.  
499 Zheng, J., and Leung, K.Y. (2007). Dissection of a type VI secretion system in *Edwardsiella*  
500 *tarda*. Mol. Microbiol. 66, 1192-206.  
501 Zhou, P., She, Y., Dong, N., Li, P., He, H., Borio, A., Wu, Q., Lu, S., Ding, X., Cao, Y., Xu, Y.,  
502 Gao, W., Dong, M., Ding, J., Wang, D.C., Zamyatina, A., and Shao, F. (2018).  
503 Alpha-kinase 1 is a cytosolic innate immune receptor for bacterial ADP-heptose. Nature  
504 561, 122-126.  
505
